# Supplementary material
Source: PubMed Central journal article supplement (PMC2760986)
Supplement: NIHMS89652-supplement-HPLC-NMR.pdf [file NIHMS89652-supplement-HPLC-NMR.pdf]

# Synthesis of 2,3,4-Trisubstituted Thiochromanes by Using an Organocatalytic Enantioselective Tandem Michael-Henry Reaction

Rajasekhar Dodda, Joshua J. Goldman, Cong-Gui Zhao,\*  
Grant A. Broker and Edward R.T. Tiekink

Department of Chemistry, University of Texas at San Antonio,  
One UTSA Circle, San Antonio, TX 78249-0698

## Supporting Information

### Table of Contents

|                                   |      |
|-----------------------------------|------|
| NMR Data of New Compounds.....    | S-1  |
| X-Ray Data of Compound 10b.....   | S-5  |
| Additional References.....        | S-6  |
| NMR Spectra of New Compounds..... | S-7  |
| HPLC Analysis Spectra.....        | S-31 |

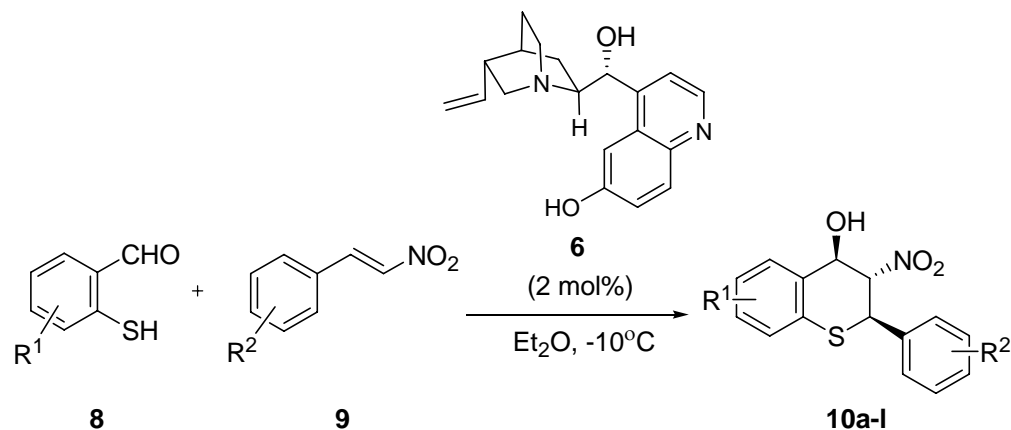

<sup>1</sup>H and <sup>13</sup>C NMR data of compounds 10a-l.

(2*R*\*,3*S*\*,4*R*\*)-3-Nitro-2-phenyl-thiochroman-4-ol (10a)

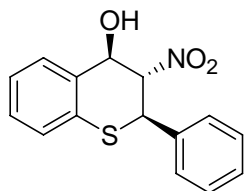

<sup>1</sup>H NMR (500 MHz, Acetone-*d*<sub>6</sub>) δ = 5.16 (d, *J* = 10.5 Hz, 1H), 5.37-5.43 (m, 2H), 5.83 (d, *J* = 8.0 Hz, 1H), 7.14 (dd, *J* = 7.0, 2.0 Hz, 1H), 7.25-7.28 (m, 2H), 7.39-7.44 (m, 3H), 7.53-7.55 (m, 2H),

7.73 (dd,  $J = 7.0, 1.5$  Hz, 1H).  $^{13}\text{C}$  NMR (125 MHz, Acetone- $d_6$ )  $\delta = 46.8, 71.7, 93.5, 124.8, 125.4, 128.0, 128.5, 128.7$  (2C), 129.2 (2C), 129.4, 131.9, 135.4, 135.8.

**(2*R*\*,3*S*\*,4*R*\*)-2-(2-Bromophenyl)-3-nitro-thiochroman-4-ol (10b)**

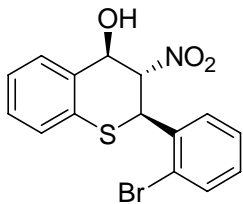

$^1\text{H}$  NMR (300 MHz, Acetone- $d_6$ )  $\delta = 5.46$  (t,  $J = 8.4$  Hz, 1H), 5.56 (t,  $J = 10.1$  Hz, 1H), 5.67 (d,  $J = 10.2$  Hz, 1H), 6.02 (d,  $J = 8.4$  Hz, 1H), 7.14 (m, 1H), 7.24-7.34 (m, 3H), 7.47 (td,  $J = 7.3, 0.9$  Hz, 1H), 7.67 (dd,  $J = 7.8, 1.2$  Hz, 1H), 7.73- 7.76 (m, 2H).  $^{13}\text{C}$  NMR (75 MHz, Acetone- $d_6$ )  $\delta = 45.5, 71.8, 92.2, 124.4, 125.0, 125.7, 128.0, 128.6, 128.8, 129.4, 131.0, 131.3, 133.8, 134.5, 135.9$ .

**(2*R*\*,3*S*\*,4*R*\*)-2-(4-Bromophenyl)-3-nitro-thiochroman-4-ol (10c)**

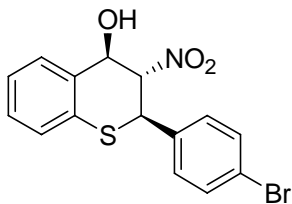

$^1\text{H}$  NMR (500 MHz, Acetone- $d_6$ )  $\delta = 5.19$  (d,  $J = 10.5$  Hz, 1H), 5.36-5.42 (m, 2H), 5.88 (d,  $J = 8.0$  Hz, 1H), 7.14 (dd,  $J = 7.0, 2.0$  Hz, 1H), 7.26, 7.28 (m, 2H), 7.51 (d,  $J = 8.5$  Hz, 2H), 6.62 (d,  $J = 8.5$  Hz, 2H), 7.74 (dd,  $J = 7.0, 2.5$  Hz, 1H).  $^{13}\text{C}$  NMR (125 MHz, Acetone- $d_6$ )  $\delta = 46.1, 71.5, 93.4, 122.9, 124.8, 125.5, 128.0, 128.5, 130.7$  (2C), 131.5, 132.4 (2C), 134.9, 135.8.

**(2*R*\*,3*S*\*,4*R*\*)-2-(3-Chlorophenyl)-3-nitro-thiochroman-4-ol (10d)**

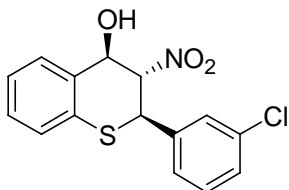

$^1\text{H}$  NMR (500 MHz, Acetone- $d_6$ )  $\delta = 5.21$  (m, 1H), 5.41-5.43 (m, 2H), 5.90 (m, 1H), 7.16 (dd,  $J = 7.5, 2.0$  Hz, 1H), 7.25-7.29 (m, 2H), 7.44-7.47 (m, 2H), 7.50-7.52 (m, 1H), 7.61 (d,  $J = 2.0$  Hz, 1H), 7.74 (m, 1H).  $^{13}\text{C}$  NMR (125 MHz, Acetone- $d_6$ )  $\delta = 46.2, 71.5, 93.3, 124.9, 125.6, 127.3, 127.9, 128.6, 128.7, 129.5, 131.0, 131.5, 134.4, 135.8, 137.9$ .

**(2*R*\*,3*S*\*,4*R*\*)-2-(4-Chlorophenyl)-3-nitro-thiochroman-4-ol (10e)**

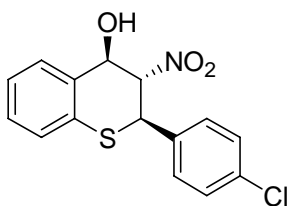

$^1\text{H}$  NMR (300 MHz, Acetone- $d_6$ )  $\delta$  = 5.19 (d,  $J$  = 11.1, 1H), 5.35-5.46 (m, 2H), 5.71 (d,  $J$  = 8.4 Hz, 1H), 7.14 (m, 1H), 7.24-7.27 (m, 2H), 7.44 (d,  $J$  = 8.7 Hz, 2H), 7.56 (d,  $J$  = 8.7 Hz, 2H), 7.21 (m, 1H).  $^{13}\text{C}$  NMR (75 MHz, Acetone- $d_6$ )  $\delta$  = 46.2, 71.6, 93.5, 124.8, 125.5, 127.9, 128.5, 129.3 (2C), 130.4 (2C), 131.6, 134.3, 134.7, 135.7.

**(2R\*,3S\*,4R\*)-3-Nitro-2-(2-nitrophenyl)-thiochroman-4-ol (10f)**

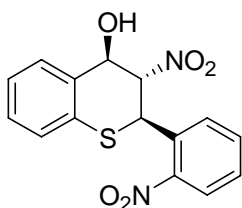

$^1\text{H}$  NMR (500 MHz, Acetone- $d_6$ )  $\delta$  = 5.41 (t,  $J$  = 8.5 Hz, 1H), 5.50 (t,  $J$  = 10.0 Hz, 1H), 5.70 (d,  $J$  = 10.0 Hz, 1H), 6.03 (d,  $J$  = 8.0 Hz, 1H), 7.20 (m, 1H), 7.30-7.32 (m, 2H), 7.68 (td,  $J$  = 8.5, 1.5 Hz, 1H), 7.76 (m, 1H), 7.81 (td,  $J$  = 8.0, 1.5 Hz, 1H), 7.96 (td,  $J$  = 8.0, 1.5 Hz, 2H).  $^{13}\text{C}$  NMR (125 MHz, Acetone- $d_6$ )  $\delta$  = 40.9, 71.6, 93.0, 125.1, 125.3, 126.0, 127.7, 128.7, 129.9, 130.1, 131.1, 133.7, 133.9, 136.2, 150.1.

**(2R\*,3S\*,4R\*)-2-(2-Methoxyphenyl)-3-nitro-thiochroman-4-ol (10g)**

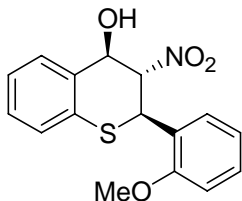

$^1\text{H}$  NMR (300 MHz, Acetone- $d_6$ )  $\delta$  = 3.84 (s, 3H), 5.38 (m, 1H), 5.48-5.50 (m, 2H), 5.84 (d,  $J$  = 8.1 Hz, 1H), 6.96 (td,  $J$  = 7.5, 1.2 Hz, 1H), 7.05 (d,  $J$  = 8.4 Hz, 1H), 7.12 (m, 1H), 7.21-7.27 (m, 2H), 7.33 (td,  $J$  = 8.7, 1.8, 1H), 7.45 (dd,  $J$  = 7.5, 1.8 Hz, 1H), 7.72 (m, 1H).  $^{13}\text{C}$  NMR (75 MHz, Acetone- $d_6$ )  $\delta$  = 41.0, 55.7, 72.0, 92.3, 112.0, 121.1, 123.3, 125.1, 125.4, 127.7, 128.3, 129.2, 130.5, 132.4, 136.1, 157.7.

**(2R\*,3S\*,4R\*)-2-(4-Methoxyphenyl)-3-nitro-thiochroman-4-ol (10h)**

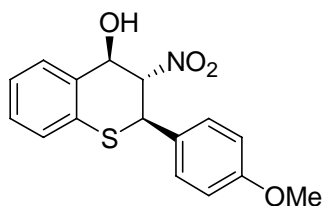

$^1\text{H}$  NMR (500 MHz, Acetone- $d_6$ )  $\delta$  = 3.82 (s, 3H), 5.10 (d,  $J$  = 11.0 Hz, 1H), 5.33 (t,  $J$  = 10.3 Hz, 1H), 5.40 (m, 1H), 5.79 (d,  $J$  = 8.0 Hz, 1H), 6.95 (d,  $J$  = 9.0 Hz, 2H), 7.12 (dd,  $J$  = 7.5, 1.2 Hz, 1H), 7.23 (td,  $J$  = 7.0, 2.5 Hz, 1H), 7.26 (td,  $J$  = 7.0, 2.5 Hz, 1H), 7.45 (d,  $J$  = 9.0 Hz, 2H), 7.73 (m, 1H).  
 $^{13}\text{C}$  NMR (125 MHz, Acetone- $d_6$ )  $\delta$  = 46.3, 55.0, 71.7, 93.7, 114.5 (2C), 124.7, 125.3, 126.8, 128.0, 128.4, 129.9 (2C), 132.1, 135.8, 160.6.

**(2R\*,3S\*,4R\*)-2-(4-Methylphenyl)-3-nitro-thiochroman-4-ol (10i)**

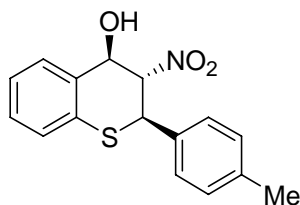

$^1\text{H}$  NMR (300 MHz, Acetone- $d_6$ )  $\delta$  = 2.32 (s, 3H), 5.10 (d,  $J$  = 10.8 Hz, 1H), 5.32-5.40 (m, 2H), 5.85 (d,  $J$  = 7.8 Hz, 1H), 7.10 (m, 1H), 7.19-7.27 (m, 4H), 7.39 (d,  $J$  = 7.8 Hz, 2H), 7.71 (dd,  $J$  = 6.9, 2.4 Hz, 1H).  $^{13}\text{C}$  NMR (75 MHz, Acetone- $d_6$ )  $\delta$  = 20.6, 46.6, 71.7, 93.6, 124.7, 125.3, 128.0, 128.4, 128.5 (2H), 129.8 (2H), 131.4, 132.1, 135.8, 139.2.

**(2R\*,3S\*,4R\*)-7-Methoxy-3-nitro-2-phenyl-thiochroman-4-ol (10j)**

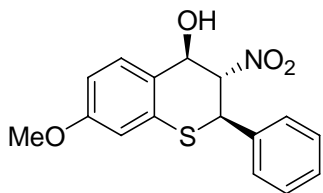

$^1\text{H}$  NMR (300 MHz, Acetone- $d_6$ )  $\delta$  = 3.80 (s, 3H), 5.16 (m, 1H), 5.31-5.37 (m, 2H), 5.72 (d,  $J$  = 6.0, 1.8 Hz, 1H), 6.67 (d,  $J$  = 2.3 Hz, 1H), 6.81 (dd,  $J$  = 8.7, 2.3 Hz, 1H), 7.36-7.43 (m, 3H), 7.50-7.53 (m, 2H), 7.61 (d,  $J$  = 8.7 Hz, 1H).  $^{13}\text{C}$  NMR (75 MHz, Acetone- $d_6$ )  $\delta$  = 47.0, 55.2, 71.6, 93.9, 109.0, 112.1, 128.7 (2C), 129.2 (2C), 129.3, 129.4, 132.8, 133.0, 135.1, 159.7.

**(2R\*,3S\*,4R\*)-2-(4-Bromophenyl)-7-Methoxy-3-nitro-thiochroman-4-ol (10k)**

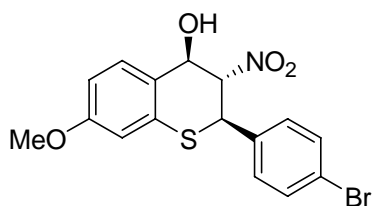

$^1\text{H}$  NMR (300 MHz, Acetone- $d_6$ )  $\delta$  = 3.80 (s, 3H), 5.15 (m, 1H), 5.31-5.35 (m, 2H), 5.78 (d,  $J$  = 5.7 Hz, 1H), 6.68 (d,  $J$  = 2.4 Hz, 1H), 6.81 (dd,  $J$  = 8.9, 2.4 Hz, 1H), 7.49 (d,  $J$  = 8.6 Hz, 2H), 7.60 (d,  $J$  = 8.6 Hz, 2H), 7.61 (d,  $J$  = 8.9 Hz, 1H).  $^{13}\text{C}$  NMR (75 MHz, Acetone- $d_6$ )  $\delta$  = 46.3, 55.2, 71.4, 93.7, 109.1, 112.2, 122.9, 127.7, 129.3, 130.7 (2C), 132.3 (2C), 132.8, 134.7, 159.6.

**(2*R*\*,3*S*\*,4*R*\*)-7-Chloro-3-nitro-2-phenylthiochroman-4-ol (10l)**

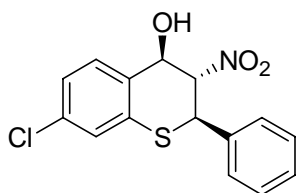

$^1\text{H}$  NMR (300 MHz, Acetone- $d_6$ )  $\delta$  = 5.18 (m, 1H), 5.37-5.40 (m, 2H), 5.80 (m, 1H), 7.17 (d,  $J$  = 2.1 Hz, 1H), 7.22 (dd,  $J$  = 8.3, 2.1 Hz, 1H), 7.36-7.41 (m, 3H), 7.48-7.52 (m, 2H), 7.68 (d,  $J$  = 8.3 Hz, 1H).  $^{13}\text{C}$  NMR (75 MHz, Acetone- $d_6$ )  $\delta$  = 47.2, 71.6, 93.2, 124.2, 125.6, 128.9 (2C), 129.5 (2C), 129.8, 129.9, 133.9, 134.6, 134.9, 135.0.

**X-Ray data of compound 10b [(2*R*,3*S*,4*R*)-2-(2-Bromophenyl)-3-nitro-thiochroman-4-ol]**

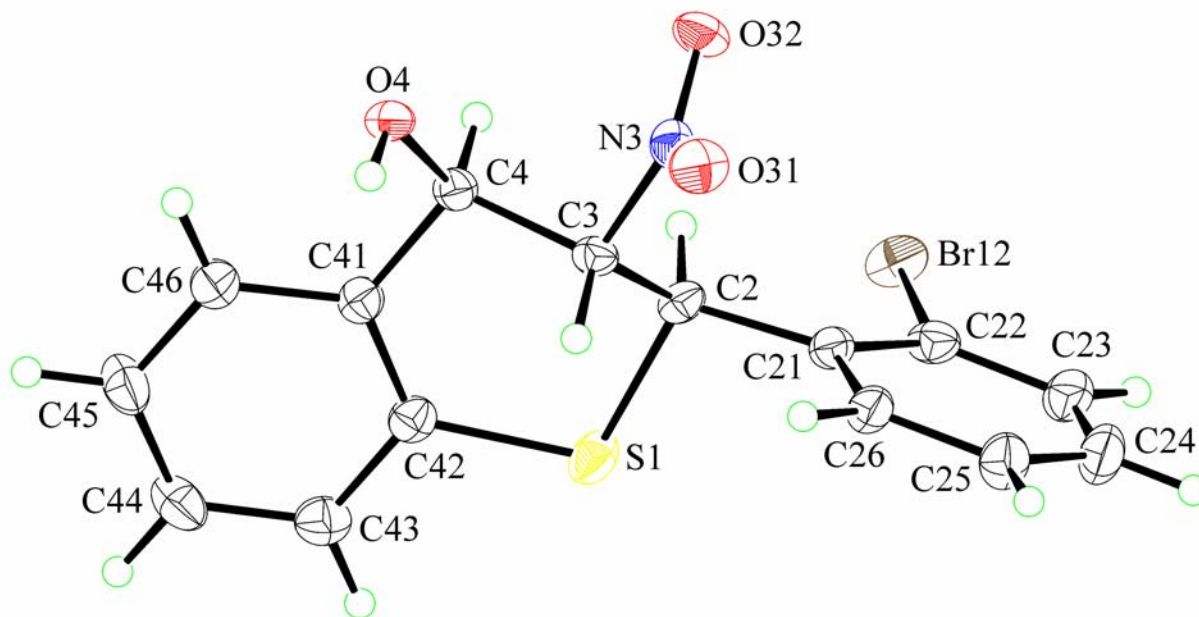

Crystal data for C<sub>15</sub>H<sub>12</sub>BrNO<sub>3</sub>S (**10b**):  $M = 366.23$ ,  $T = 173(2)$  K, orthorhombic,  $P2_12_12_1$ ,  $a = 5.1673(10)$ ,  $b = 11.594(2)$ ,  $c = 24.283(5)$  Å,  $V = 1454.8(5)$  Å<sup>3</sup>,  $Z = 4$ ,  $D_x = 1.672$  g cm<sup>-3</sup>,  $\mu = 2.978$  mm<sup>-1</sup>, no. of unique data (AFC12κ/SATURN724 CCD<sup>17</sup> using Mo-Kα radiation so that  $\theta_{\max} = 30.2^\circ$ ) = 2610, no. of parameters = 193,  $R$  (2485 data with  $I \geq 2\sigma(I)$ ) = 0.047,  $wR$  (all data) = 0.129. The structure was solved by direct-methods (SHELXS-97<sup>18</sup>) and refined (anisotropic displacement parameters, H atoms in the riding model approximation and a weighting scheme  $w = 1/[\sigma^2(F_o^2) + 0.069P^2 + 0.735P]$  where  $P = (F_o^2 + 2F_c^2)/3$ ) with SHELXL-97 on  $F^2$ .<sup>19</sup> The absolute structure was determined based on differences in Friedel pairs included in the data set yielding a value for the Flack parameter<sup>20</sup> of -0.002(16). Fig. 1 was drawn with ORTEP-II<sup>21</sup> at 35% displacement ellipsoids. Molecules aggregate in the crystal structure via a zig-zag chain of [O-H...O]<sub>∞</sub> hydrogen bonds aligned along the  $a$ -axis: O1-H...O1<sup>*i*</sup> = 1.97 Å, O1...O1<sup>*i*</sup> = 2.797(4) Å, with O-H...O angle of 169° for  $i: \frac{1}{2}+x, \frac{1}{2}-y, -z$ . CCDC deposition number: 647961.

#### **Additional References:**

17. CrystalClear User Manual, Rigaku/MSI Inc., The Woodlands, TX 77381, USA, **2005**;
18. Sheldrick, G. M. *Acta Crystallogr.* **1990**, *A46*, 467;
19. Sheldrick, G. M. SHELXL97. University of Göttingen, Germany, **1997**;
20. Flack, H. D. *Acta Crystallogr.* **1983**, *A39*, 876;
21. Johnson, C. K. *ORTEP-II, Report ORNL-5138*, Oak Ridge National Laboratory: Oak Ridge, TN, 1976.

VII-DR-146-1H

Archive directory: /home/drajasek/vnmrsys/data  
Sample directory:

Pulse Sequence: s2pu1

Solvent: Acetone  
Ambient temperature  
File: VIII-DR-146-1H-phenyl  
INOVA-500 "Inova500"

Relax. delay 1.000 sec  
Pulse 45.0 degrees  
Acq. time 1.892 sec  
Width 7995.2 Hz  
8 repetitions  
OBSERVE H1, 499.6778675 MHz  
DATA PROCESSING  
FT size 32768  
Total time 0 min, 23 sec

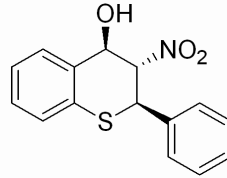

10a

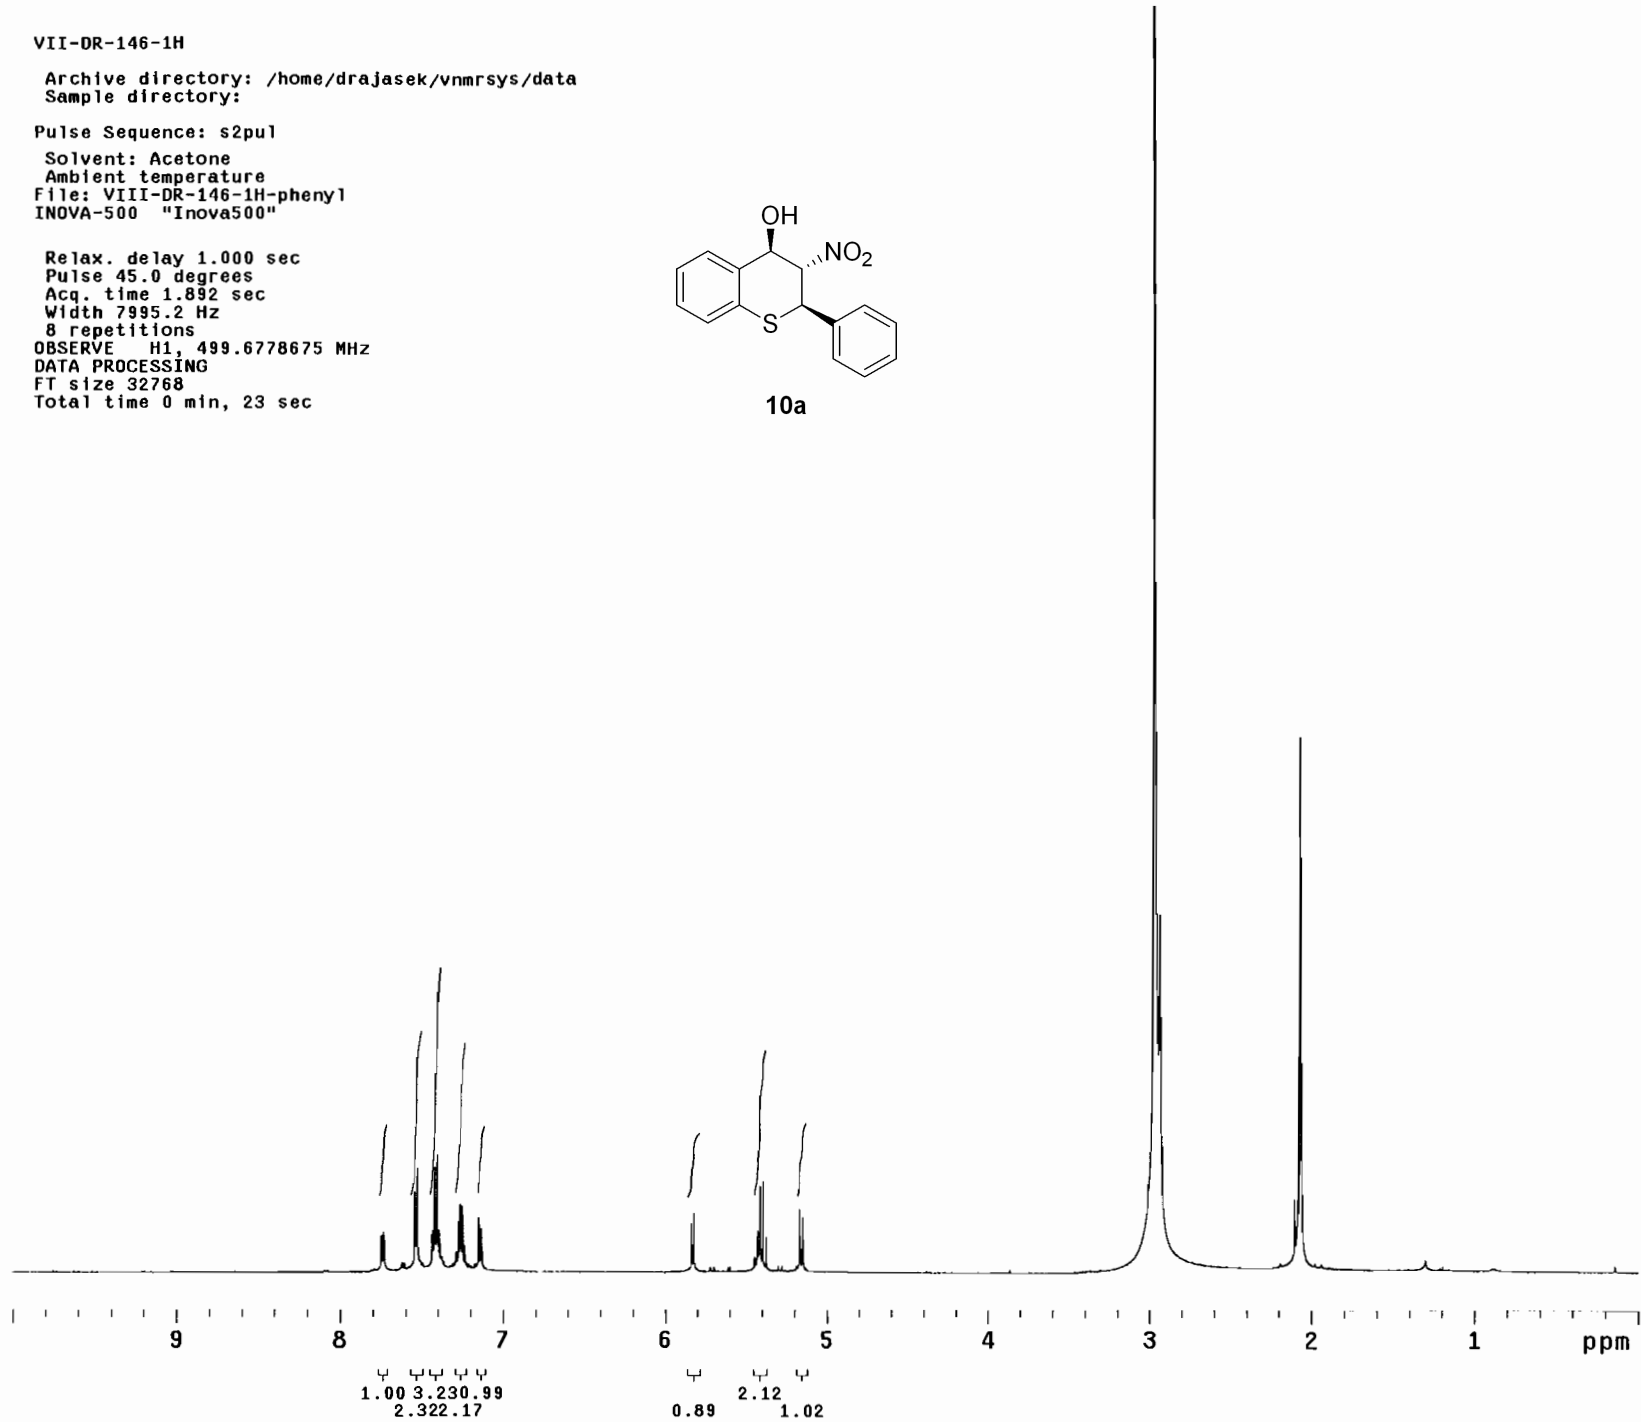

VIII-DR-146-13C

Archive directory: /home/drajasek/vnmrsys/data  
Sample directory:

Pulse Sequence: s2pu1

Solvent: Acetone  
Ambient temperature  
User: 1-14-87  
File: VIII-DR-146-13C-phenyl  
INOVA-500 "Inova500"

Relax. delay 1.000 sec  
Pulse 45.0 degrees  
Acq. time 1.300 sec  
Width 31409.5 Hz  
15000 repetitions  
OBSERVE C13, 125.6440697 MHz  
DECOUPLE H1, 499.6803660 MHz  
Power 36 dB  
continuously on  
WALTZ-16 modulated  
DATA PROCESSING  
Line broadening 0.5 Hz  
FT size 131072  
Total time 9 hr, 37 min, 20 sec

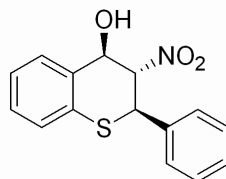

10a

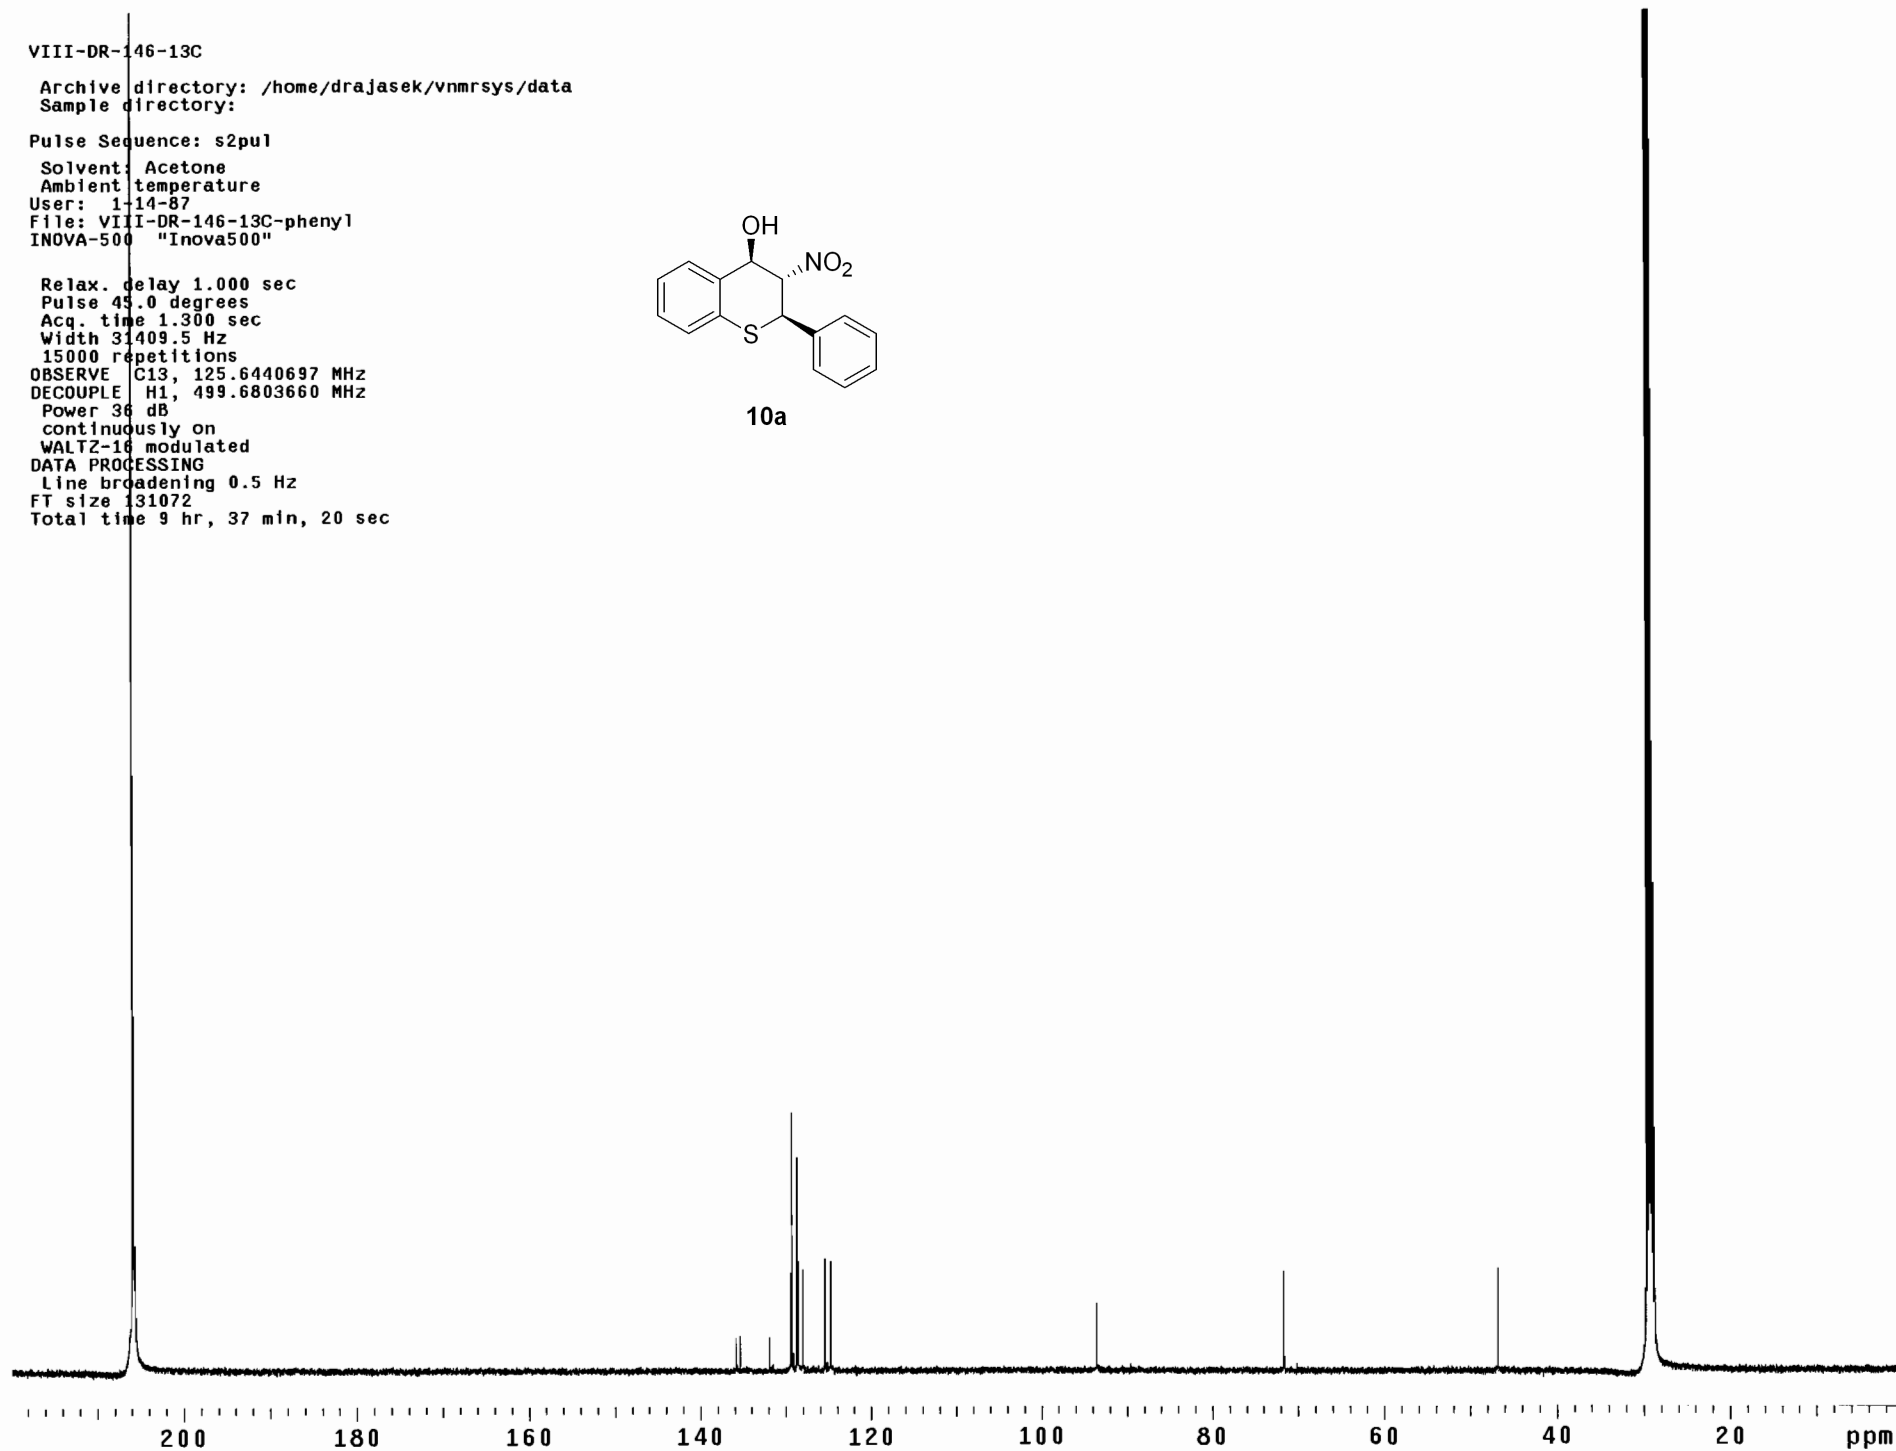



IX-DR-21-1H

Archive directory: /export2/home/drajasek/vnmrsys/data  
Sample directory:

Pulse Sequence: s2pu1

Solvent: Acetone  
Ambient temperature  
File: IX-DR-21-1H-2-bromo  
Mercury-300BB "Varian300"

Relax. delay 1.000 sec  
Pulse 45.0 degrees  
Acq. time 2.001 sec  
Width 4789.3 Hz  
8 repetitions  
OBSERVE H1, 299.7468175 MHz  
DATA PROCESSING  
FT size 32768  
Total time 0 min, 25 sec

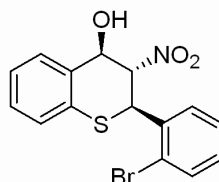

10b

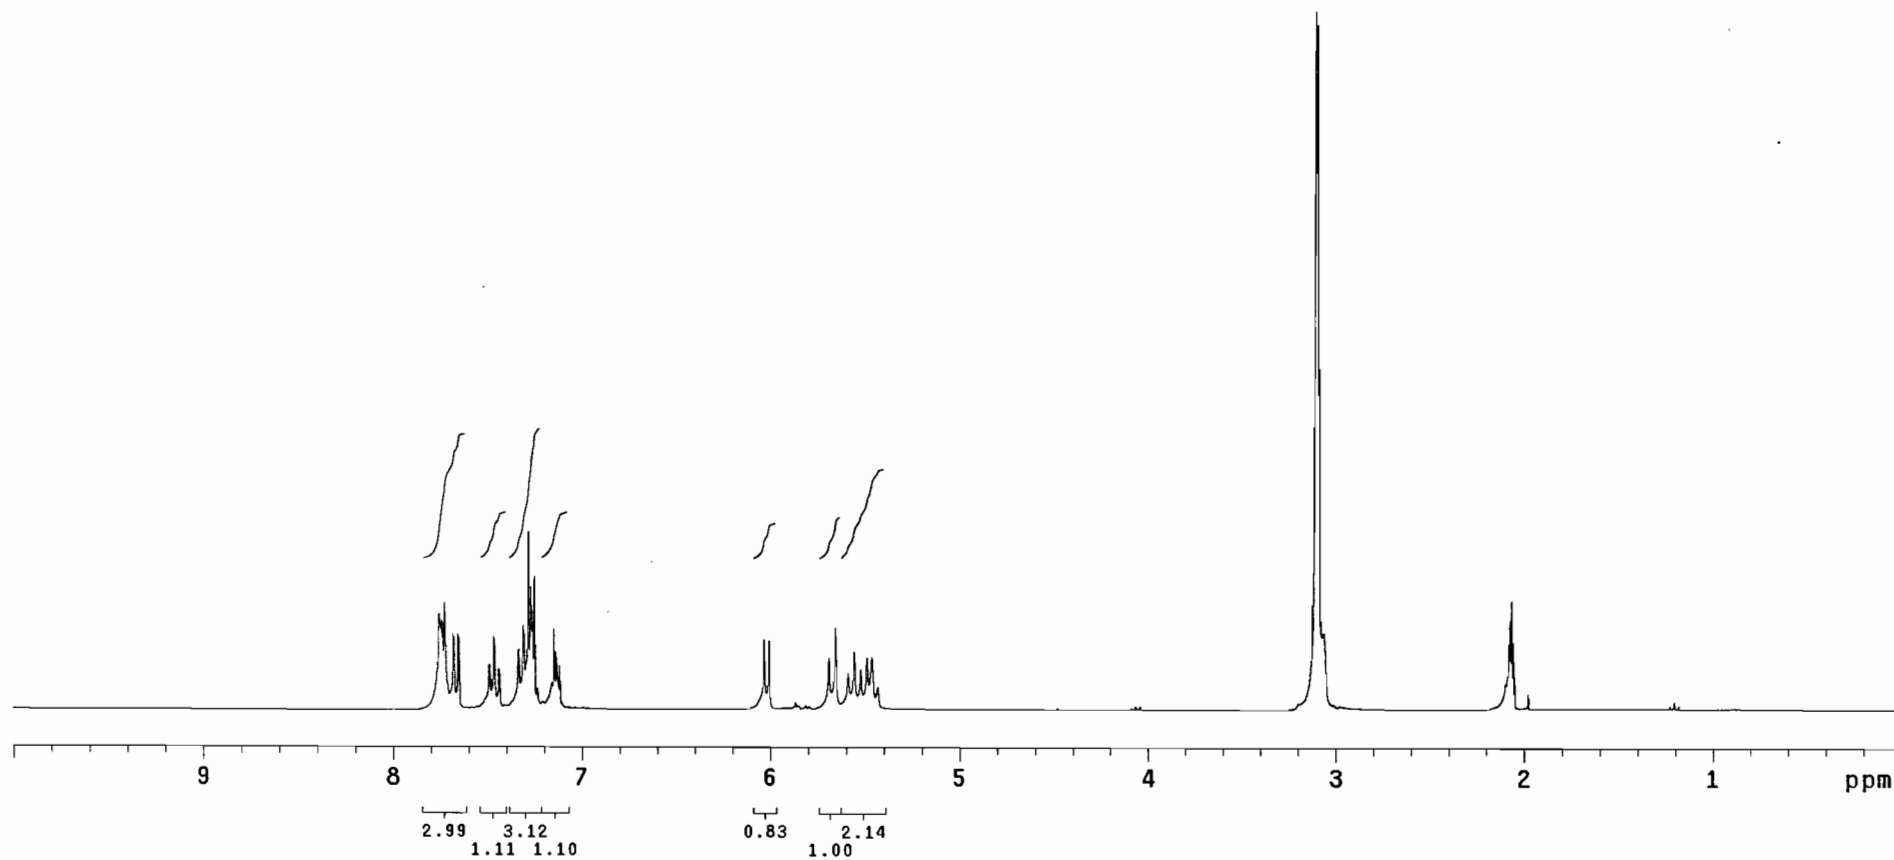

IX-DR-21-13C

Archive directory: /export2/home/drajasek/vnmrSYS/data  
Sample directory:

Pulse Sequence: s2pu1

Solvent: Acetone  
Ambient temperature  
File: IX-DR-21-13C-2-bromo  
Mercury-300BB "Varian300"

Relax. delay 1.000 sec  
Pulse 45.0 degrees  
Acq. time 1.815 sec  
Width 18832.4 Hz  
2500 repetitions  
OBSERVE C13, 75.3713792 MHz  
DECOUPLE H1, 299.7483521 MHz  
Power 33 dB  
continuously on  
WALTZ-16 modulated  
DATA PROCESSING  
Line broadening 1.0 Hz  
FT size 131072  
Total time 2 hr, 1 min, 53 sec

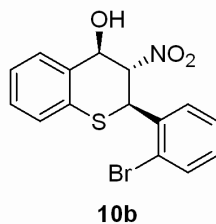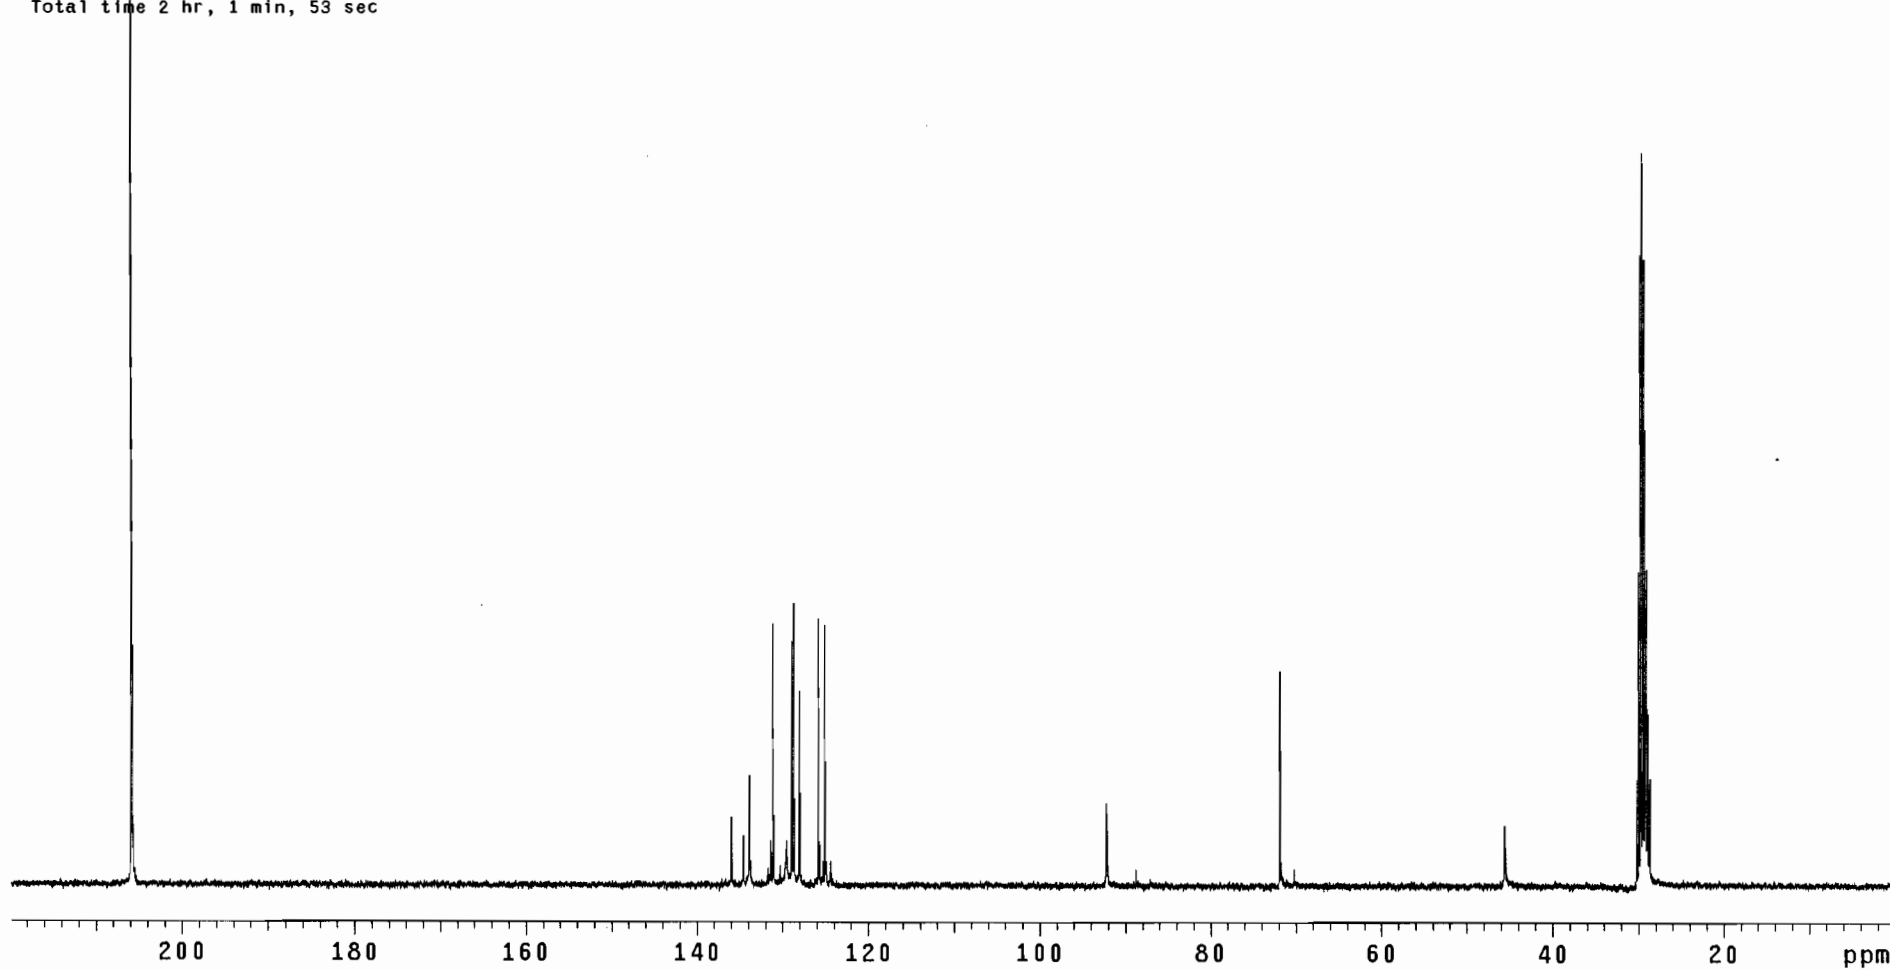

VIII-DR-149-1H

Archive directory: /home/drajasek/vnmrsys/data  
Sample directory:

Pulse Sequence: s2pu1

Solvent: Acetone  
Ambient temperature  
File: VIII-DR-149-1H  
INOVA-500 "Inova500"

Relax. delay 1.000 sec  
Pulse 45.0 degrees  
Acq. time 1.892 sec  
Width 7995.2 Hz  
8 repetitions  
OBSERVE H1, 499.6778675 MHz  
DATA PROCESSING  
FT size 32768  
Total time 0 min, 23 sec

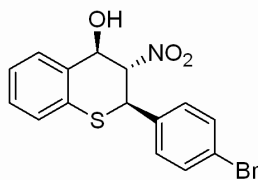

10c

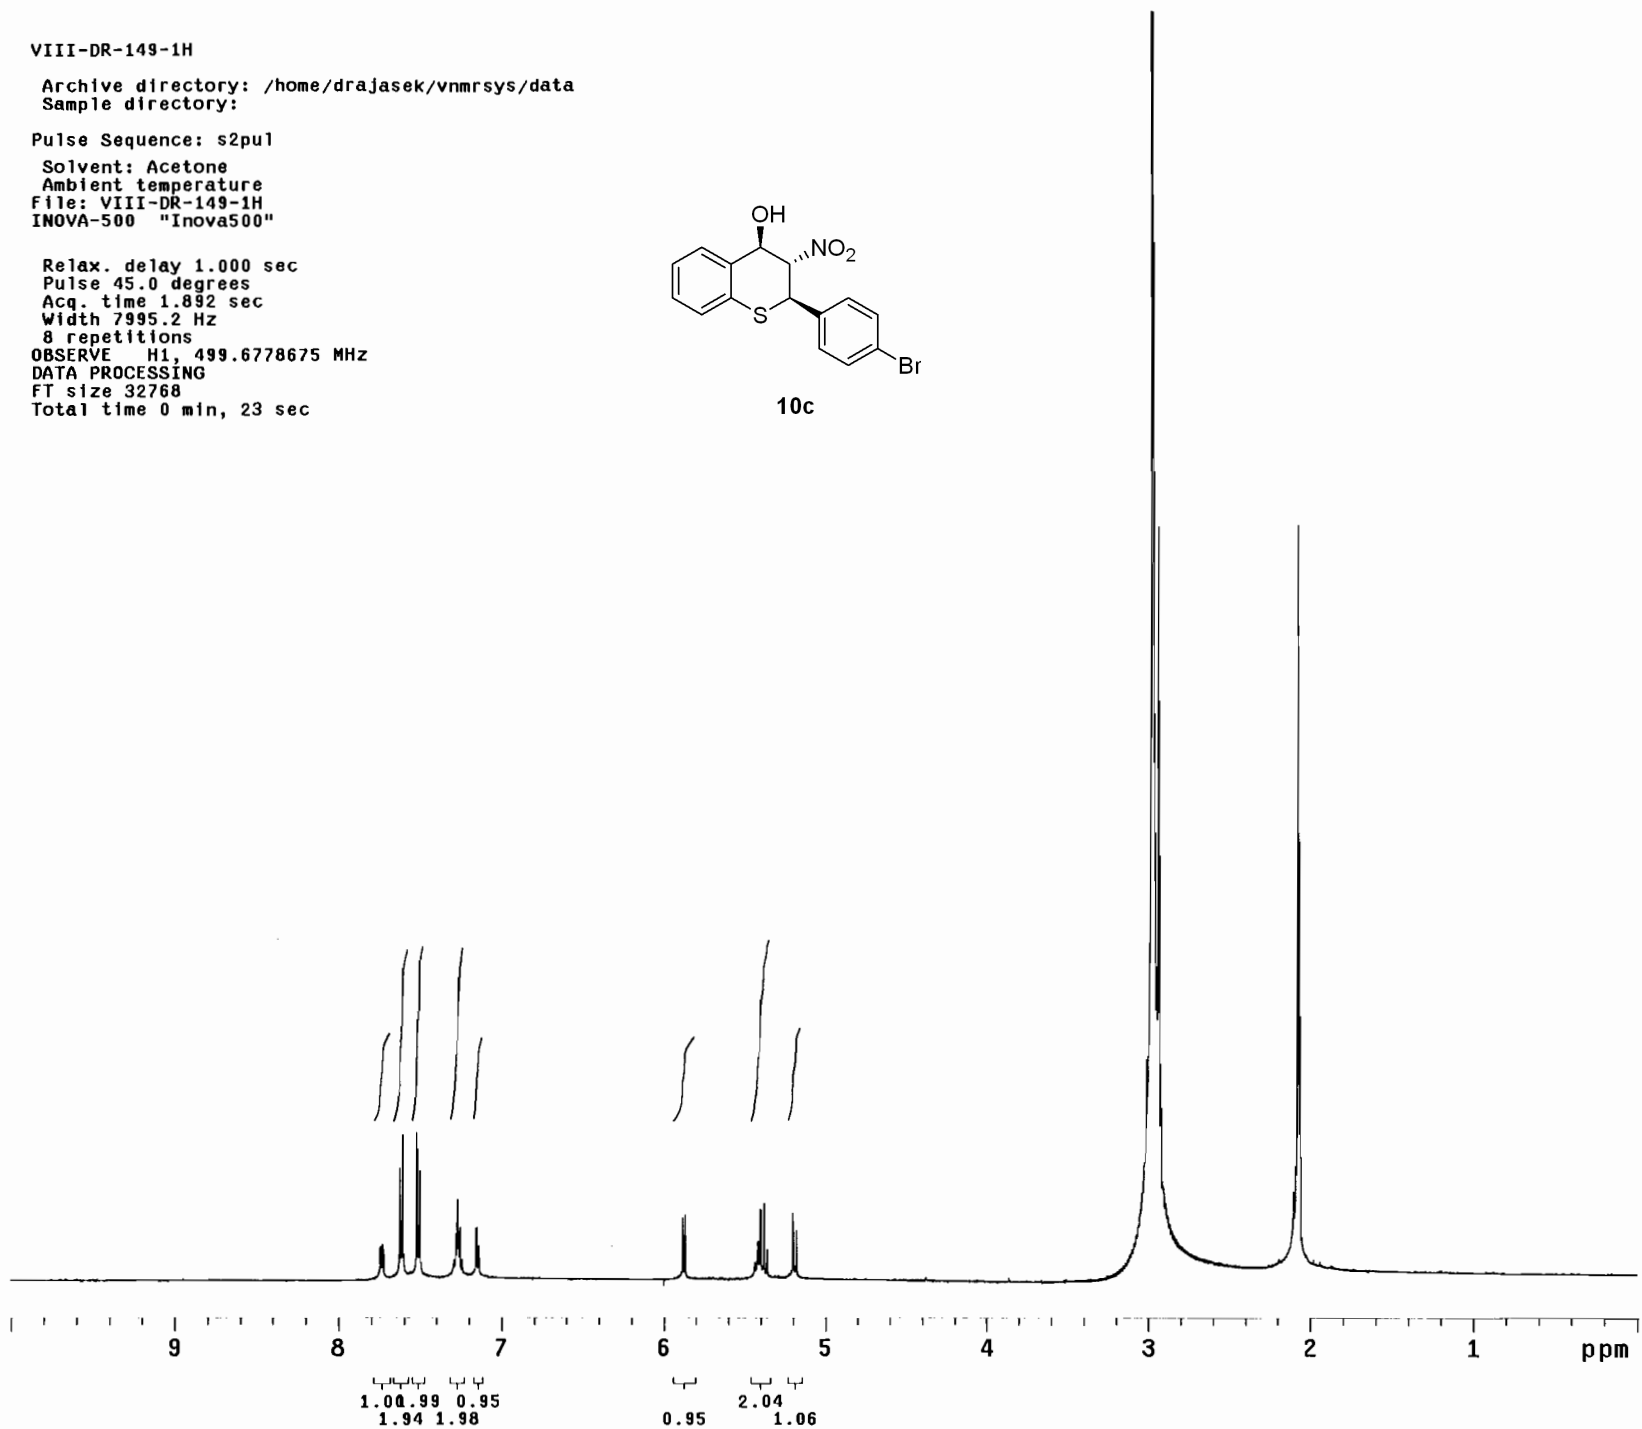

VIII-DR-149-13C

Archive directory: /home/drajasek/vnmrsys/data  
Sample directory:

Pulse Sequence: s2pul

Solvent: Acetone  
Ambient temperature

User: 1-14-87

File: IX-DR--4-bromo-13C

INOVA-500 "Inova500"

Relax. delay 1.000 sec  
Pulse 45.0 degrees  
Acq. time 1.300 sec  
Width 31409.5 Hz  
13500 repetitions  
OBSERVE C13, 125.6440697 MHZ  
DECOUPLE H1, 499.6803660 MHZ  
Power 36 dB  
continuously on  
WALTZ-16 modulated  
DATA PROCESSING  
Line broadening 0.5 Hz  
FT size 131072  
Total time 8 hr, 89 min, 36 sec

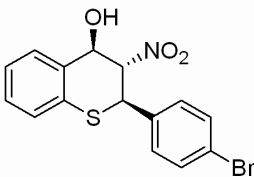

10c

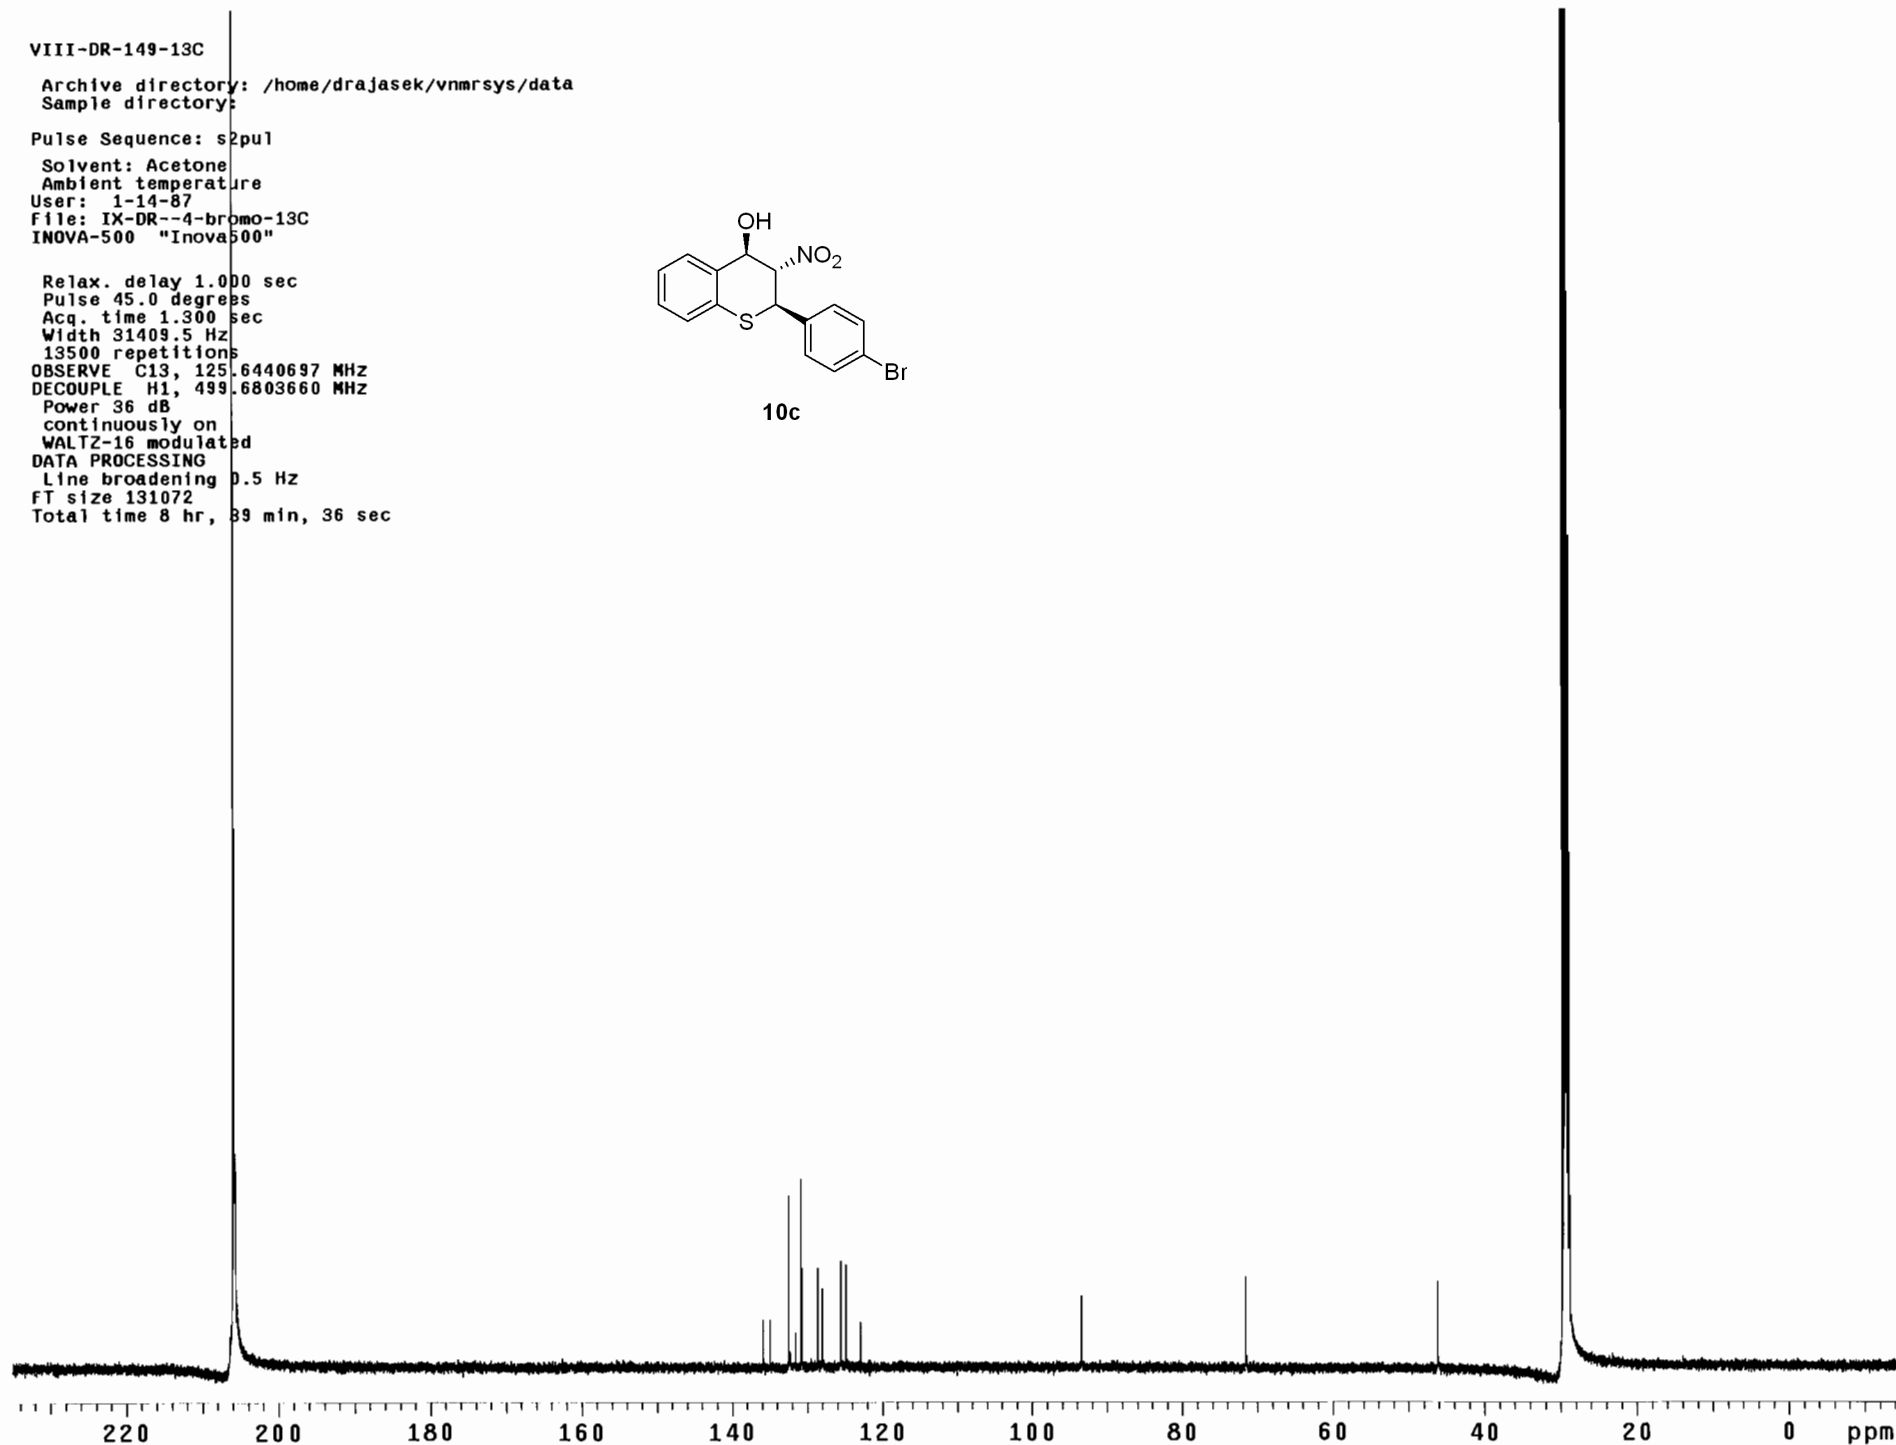

IX-DR-08-1H

Archive directory: /home/drajasek/vnmrsys/data  
Sample directory:

Pulse Sequence: s2pul

Solvent: Acetone  
Ambient temperature  
File: IX-DR-3-chloro  
INOVA-500 "Inova500"

Relax. delay 1.000 sec  
Pulse 45.0 degrees  
Acq. time 1.892 sec  
Width 7995.2 Hz  
8 repetitions  
OBSERVE H1, 499.6778675 MHz  
DATA PROCESSING  
FT size 32768  
Total time 0 min, 23 sec

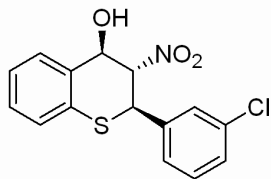

10d

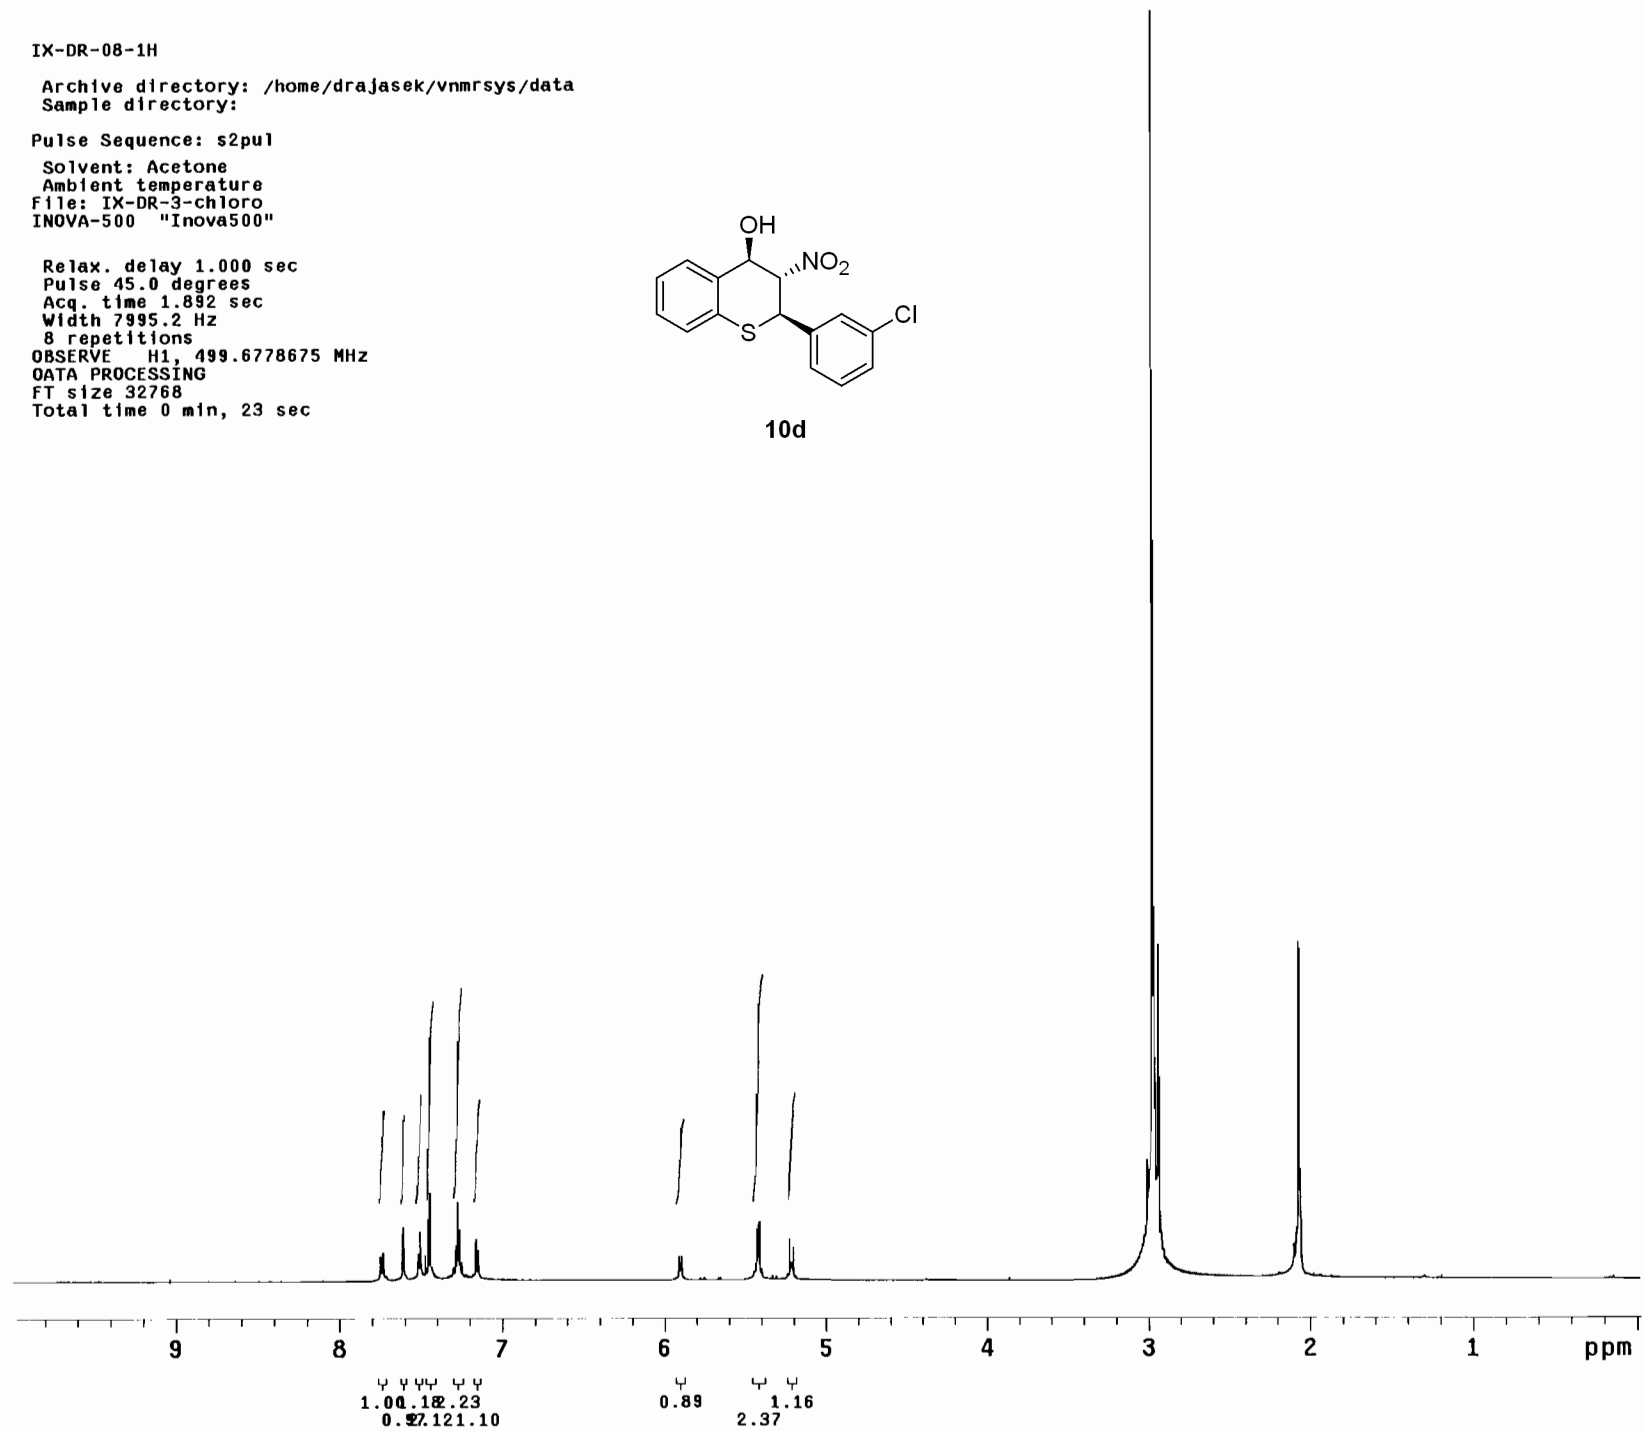

IX-DR-08-13C

Archive directory: /home/drajasek/vnmrsys/data  
Sample directory:

Pulse Sequence: s2pul

Solvent: Acetone  
Ambient temperature

User: 1-14-87

File: IX-DR-3-chloro-13C

INOVA-500 "Inova500"

Relax. delay 1.000 sec  
Pulse 45.0 degrees  
Acq. time 1.300 sec  
Width 31409.5 Hz  
10000 repetitions  
OBSERVE C13, 125.6440697 MHz  
DECOUPLE H1, 499.6803660 MHz  
Power 36 dB  
continuously on  
WALTZ-16 modulated  
DATA PROCESSING  
Line broadening 0.5 Hz  
FT size 131072  
Total time 6 hr, 24 min, 53 sec

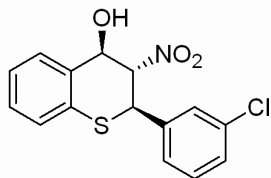

10d

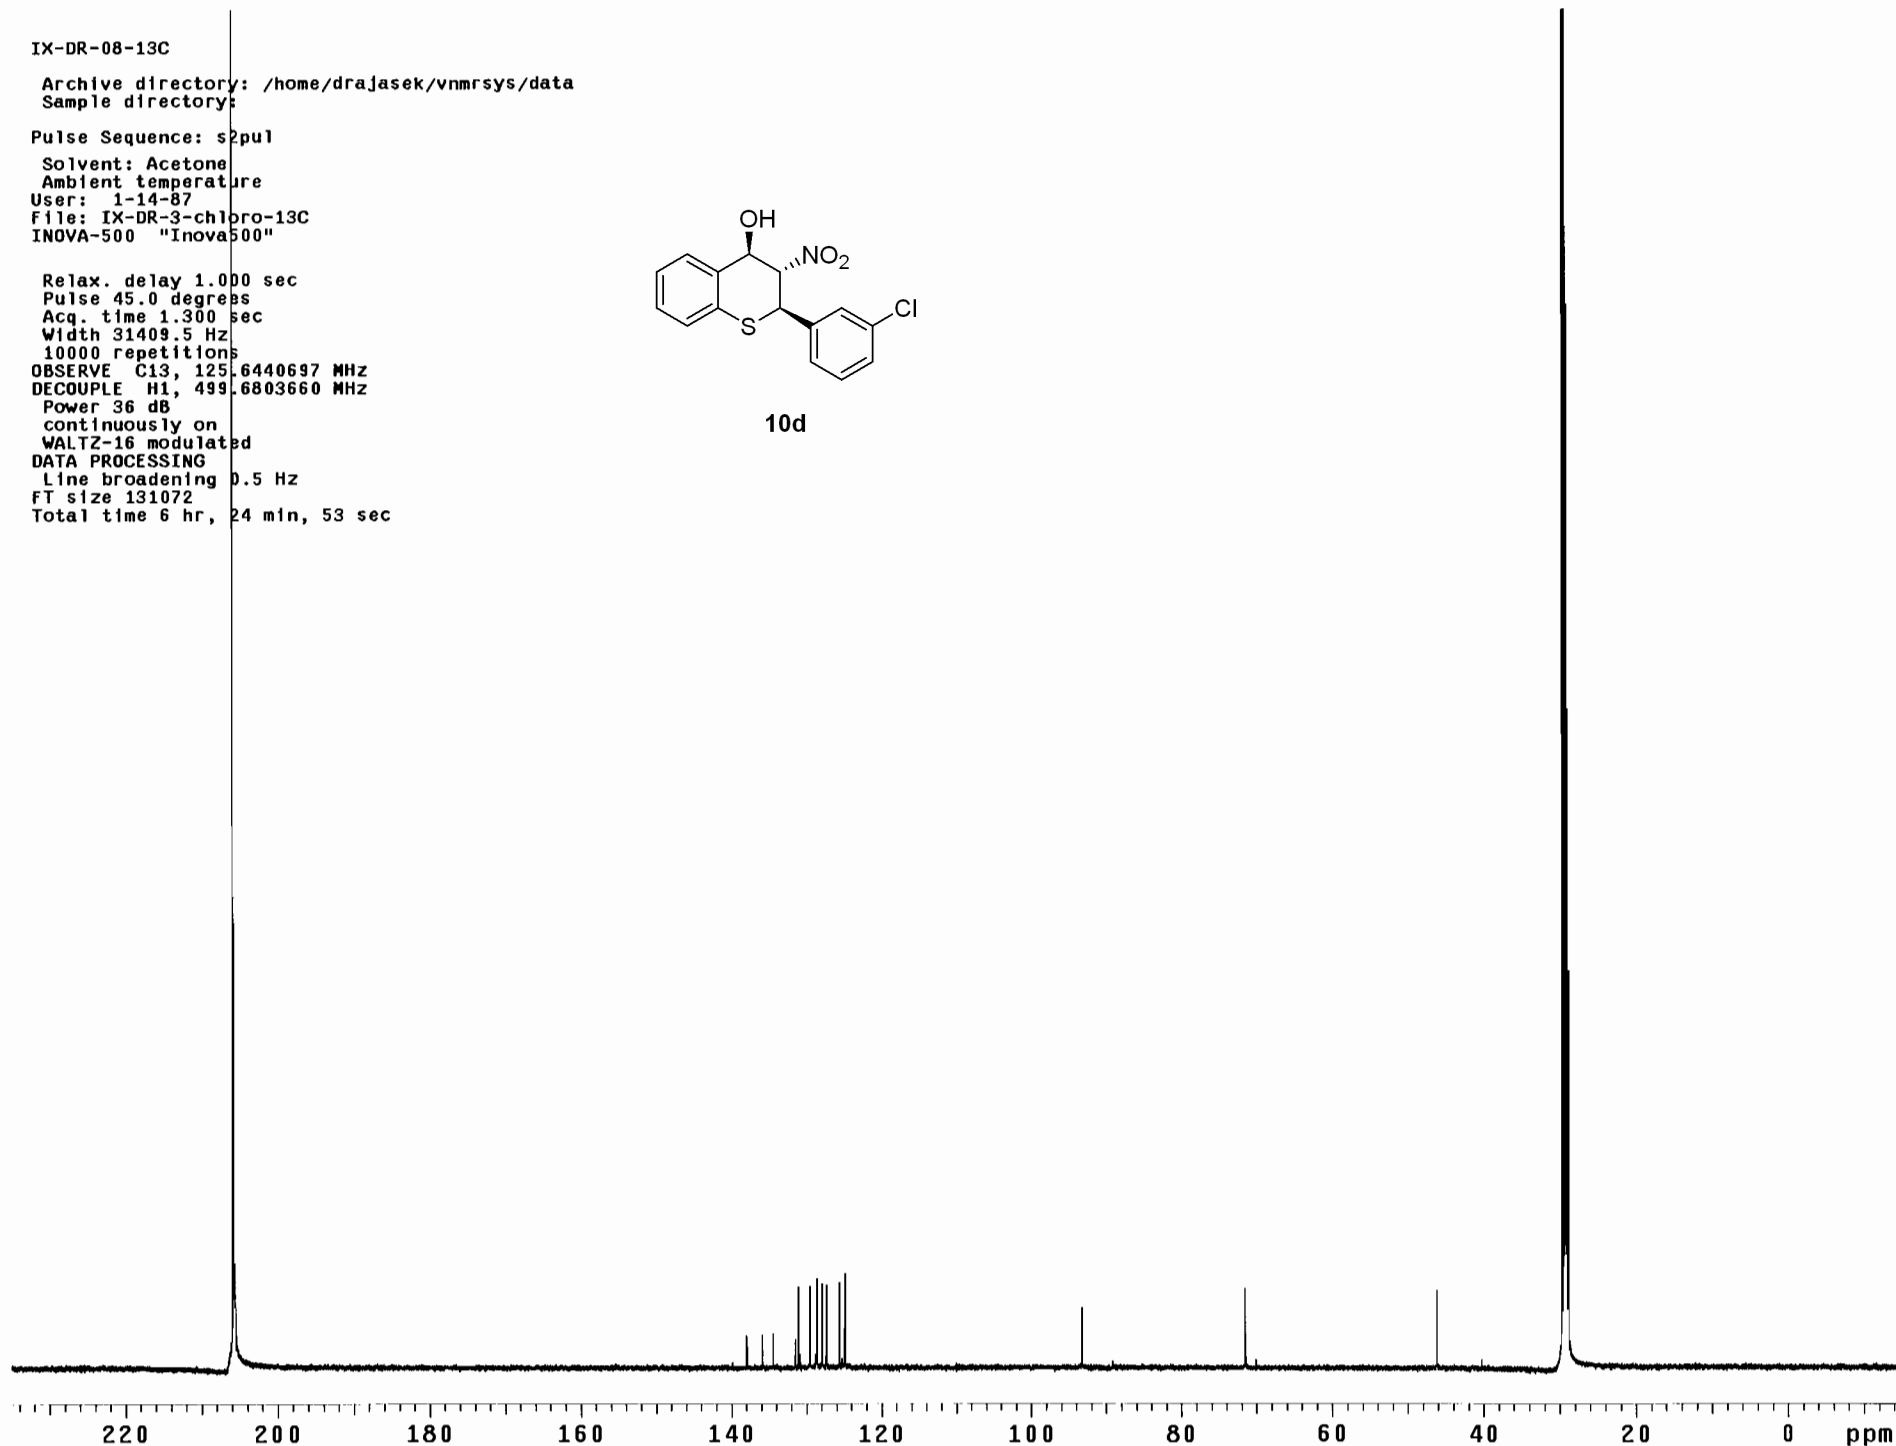

IX-DR-06-1H

Archive directory: /export2/home/drajasek/vnmrsys/data  
Sample directory:

Pulse Sequence: s2pu1

Solvent: Acetone  
Ambient temperature

File: IX-DR-06-1H

Mercury-300BB "Varian300"

Relax. delay 1.000 sec  
Pulse 45.0 degrees  
Acq. time 2.001 sec  
Width 4789.3 Hz  
8 repetitions  
OBSERVE H1, 299.7468175 MHz  
DATA PROCESSING  
FT size 32768  
Total time 0 min, 25 sec

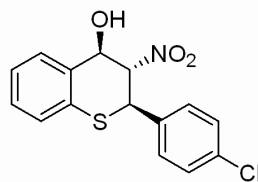

10e

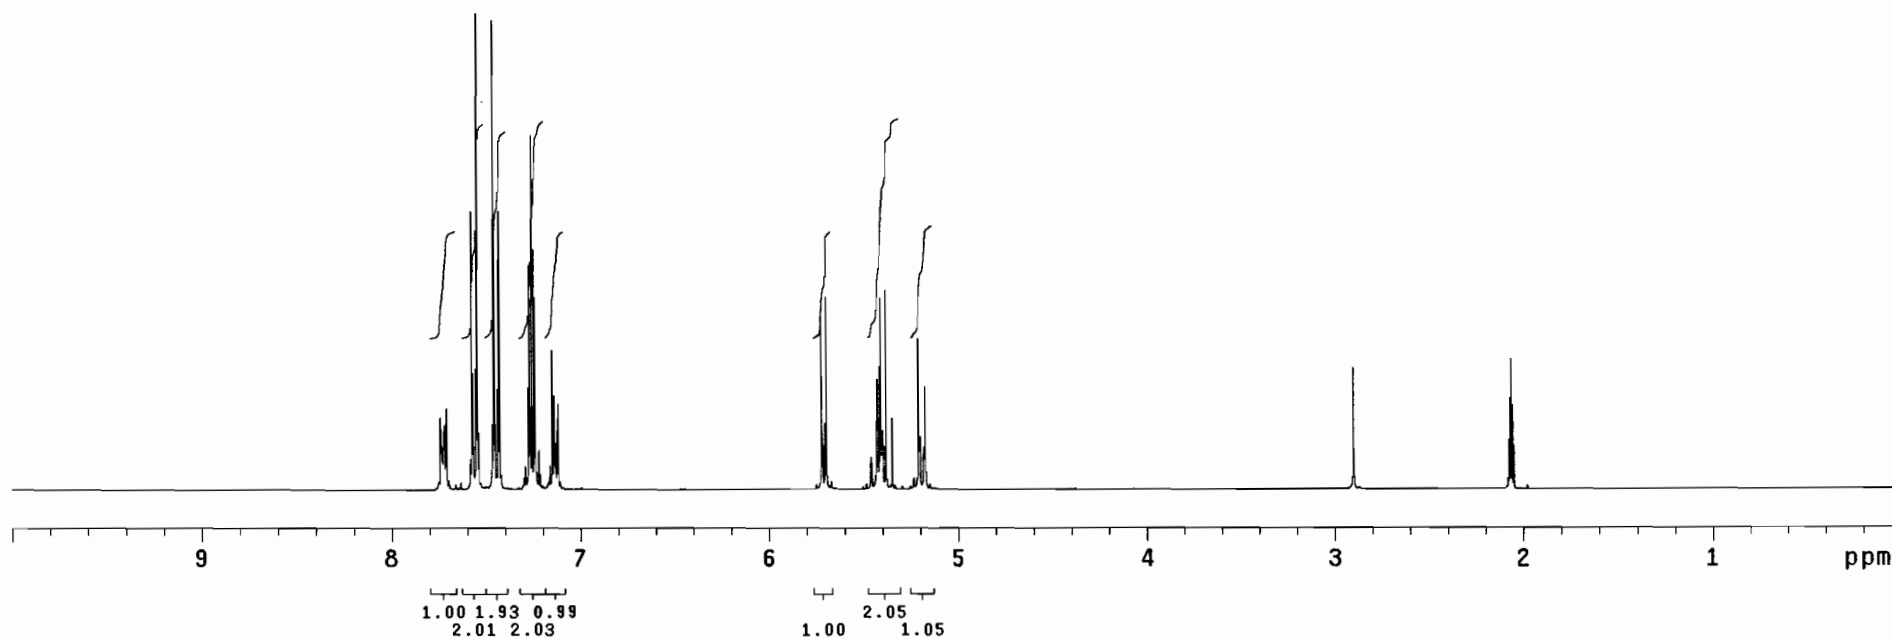

IX-DR-06-13C

Archive directory: /export2/home/drajasek/vnmrsys/data  
Sample directory:  
File: CARBON

Pulse Sequence: s2pu1  
Solvent: Acetone  
Ambient temperature  
Mercury-300BB "Varian300"

Relax. delay 1.000 sec  
Pulse 45.0 degrees  
Acq. time 1.815 sec  
Width 18832.4 Hz  
5000 repetitions  
OBSERVE C13, 75.3713792 MHz  
DECOUPLE H1, 299.7483521 MHz  
Power 33 dB  
continuously on  
WALTZ-16 modulated  
DATA PROCESSING  
Line broadening 1.0 Hz  
FT size 131072  
Total time 4 hr, 3 min, 14 sec

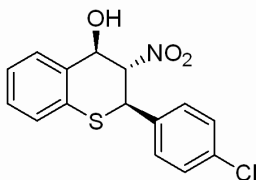

10e

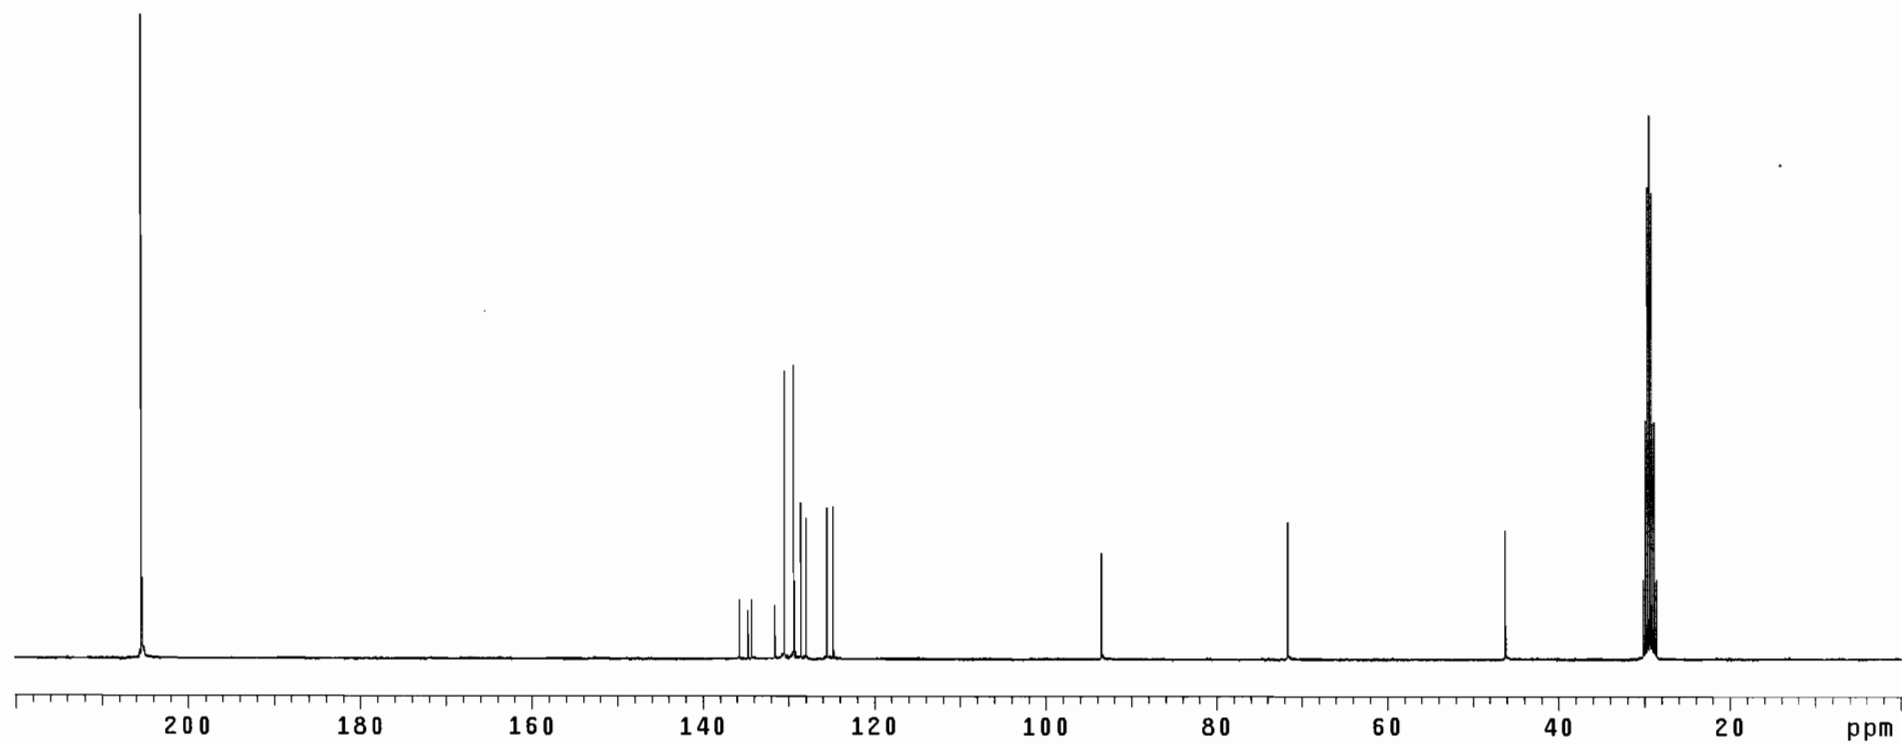



X-DR-01-1H

Archive directory: /home/drajasek/vnmrsys/data  
Sample directory:

Pulse Sequence: s2pu1

Solvent: Acetone  
Ambient temperature  
File: IX-DR-01-1H  
INOVA-500 "Inova500"

Relax. delay 1.000 sec  
Pulse 45.0 degrees  
Acq. time 1.892 sec  
Width 7995.2 Hz  
4 repetitions  
OBSERVE H1, 499.6778675 MHz  
DATA PROCESSING  
FT size 32768  
Total time 0 min, 11 sec

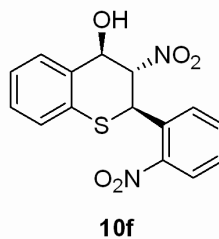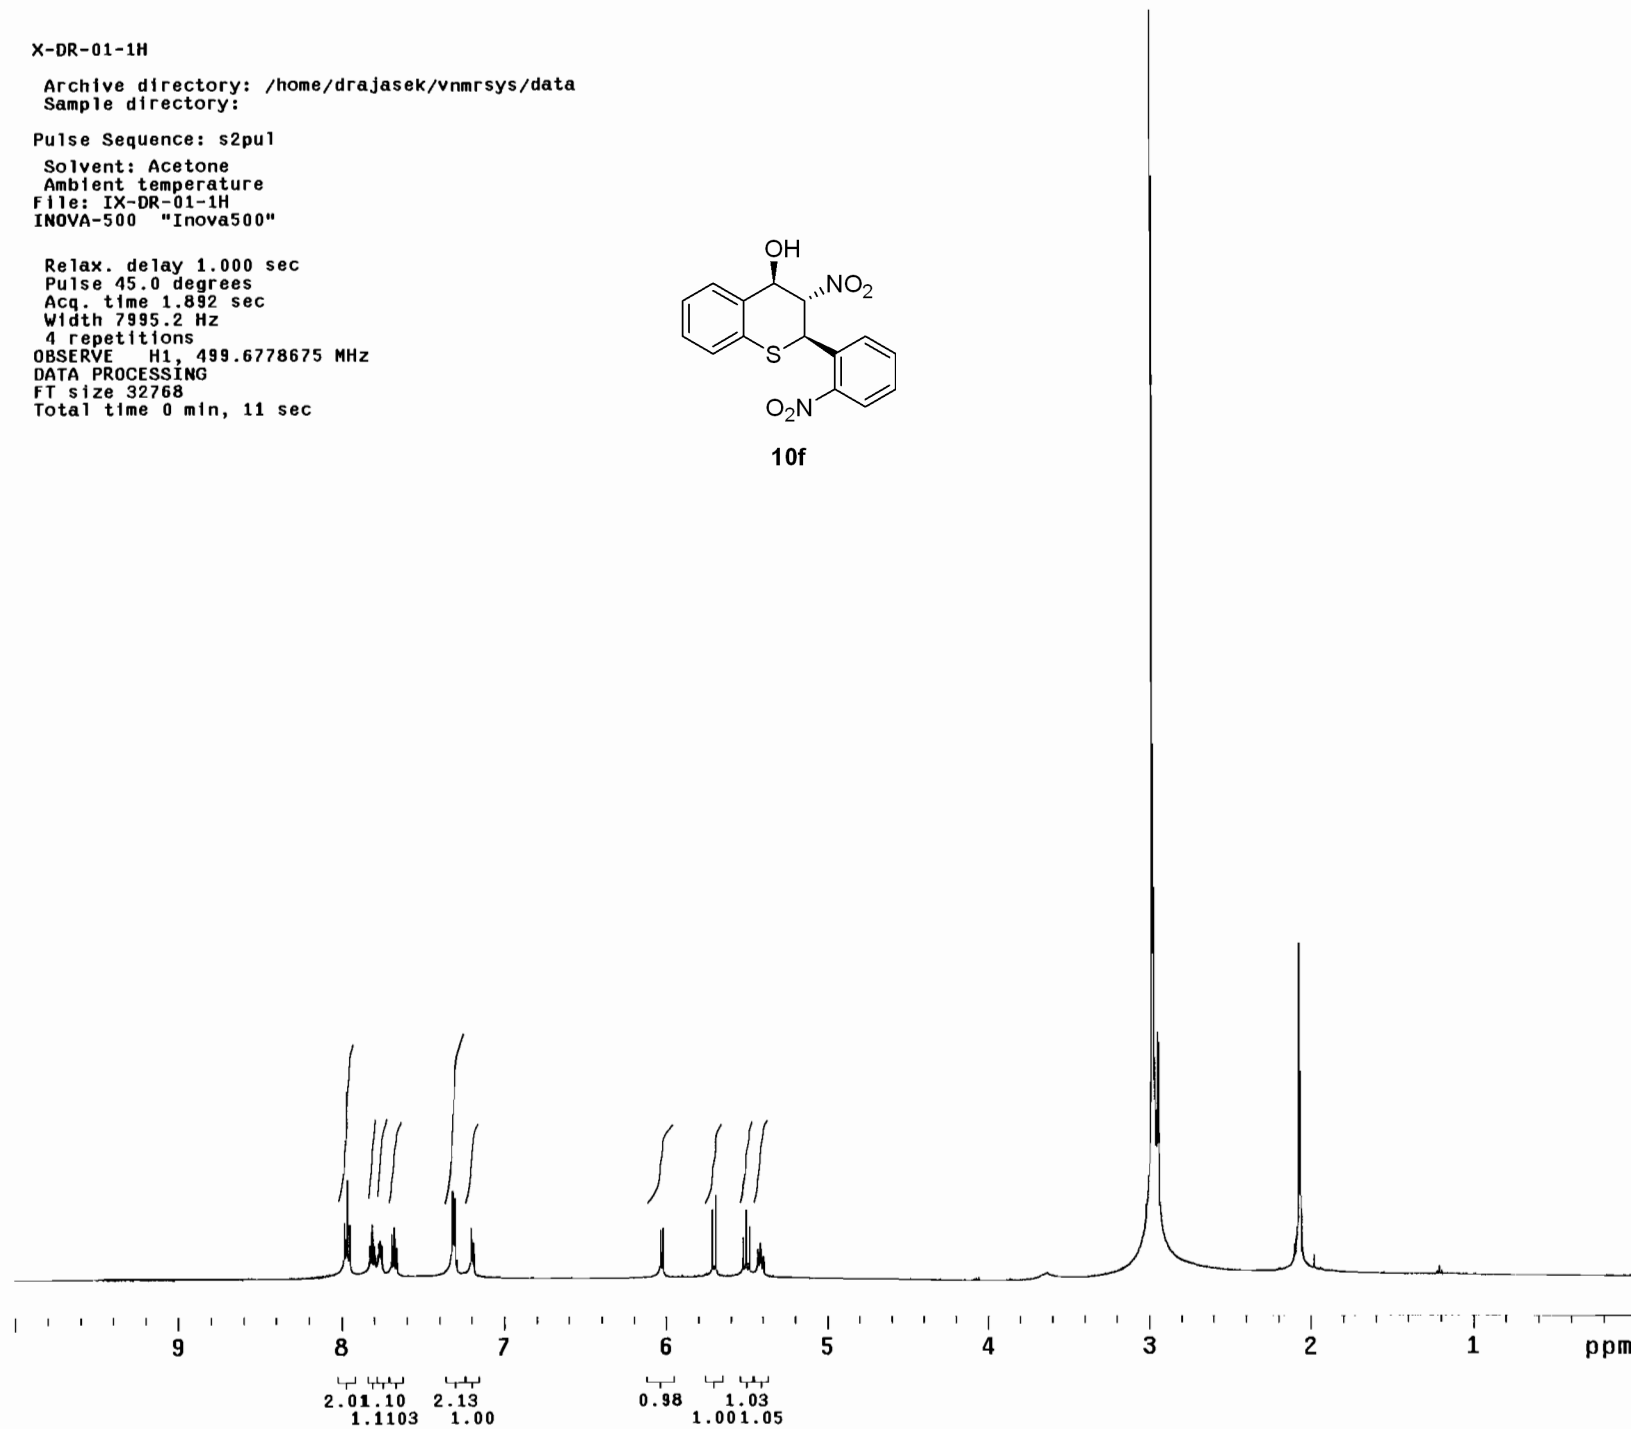

IX-DR-01-13C

Archive directory: /home/drajasek/vnmrsys/data  
Sample directory:

Pulse Sequence: s2pu1

Solvent: Acetone  
Ambient temperature

User: 1-14-87

File: IX-DR-01-13C

INOVA-500 "Inova500"

Relax. delay 1.000 sec

Pulse 45.0 degrees

Acq. time 1.300 sec

Width 31409.5 Hz

2816 repetitions

OBSERVE C13, 125.6440697 MHz

DECOUPLE H1, 499.6803660 MHz

Power 36 dB

continuously on

WALTZ-16 modulated

DATA PROCESSING

Line broadening 0.5 Hz

FT size 131072

Total time 1 hr, 51 min, 37 sec

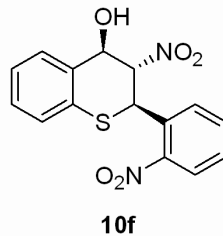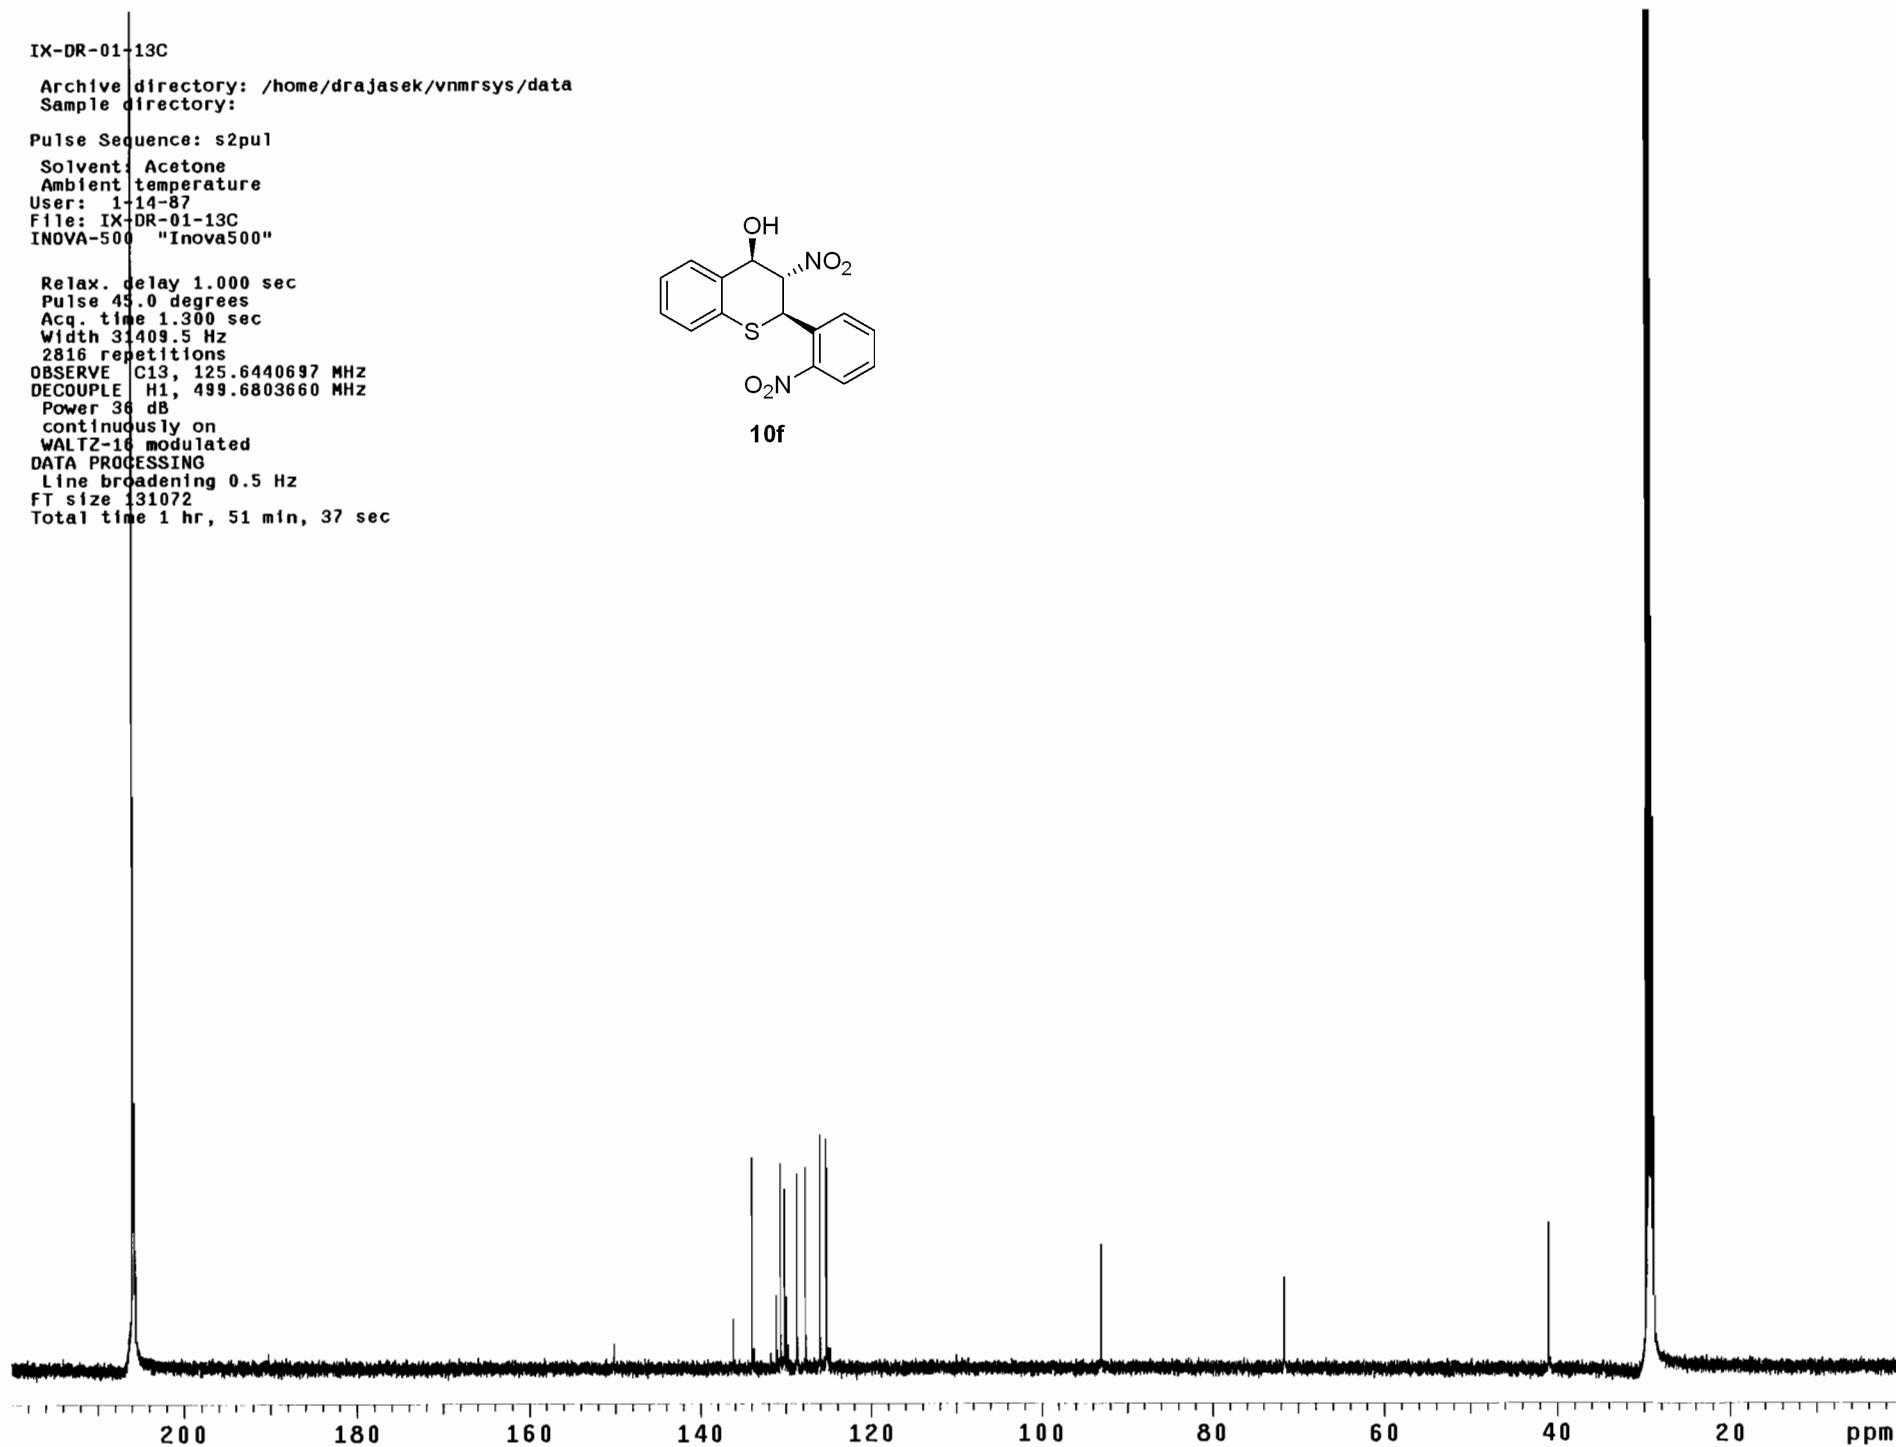

IX-DR-38-1H

Archive directory: /export2/home/drajasek/vnmrsys/data  
Sample directory:

Pulse Sequence: s2pu1

Solvent: Acetone  
Ambient temperature

File: IX-DR-38-1H

Mercury-300BB "Varian300"

Relax. delay 1.000 sec  
Pulse 45.0 degrees  
Acq. time 2.001 sec  
Width 4789.3 Hz  
8 repetitions  
OBSERVE H1, 299.7468175 MHz  
DATA PROCESSING  
FT size 32768  
Total time 0 min, 25 sec

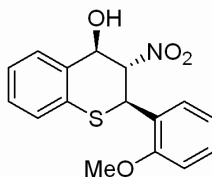

10g

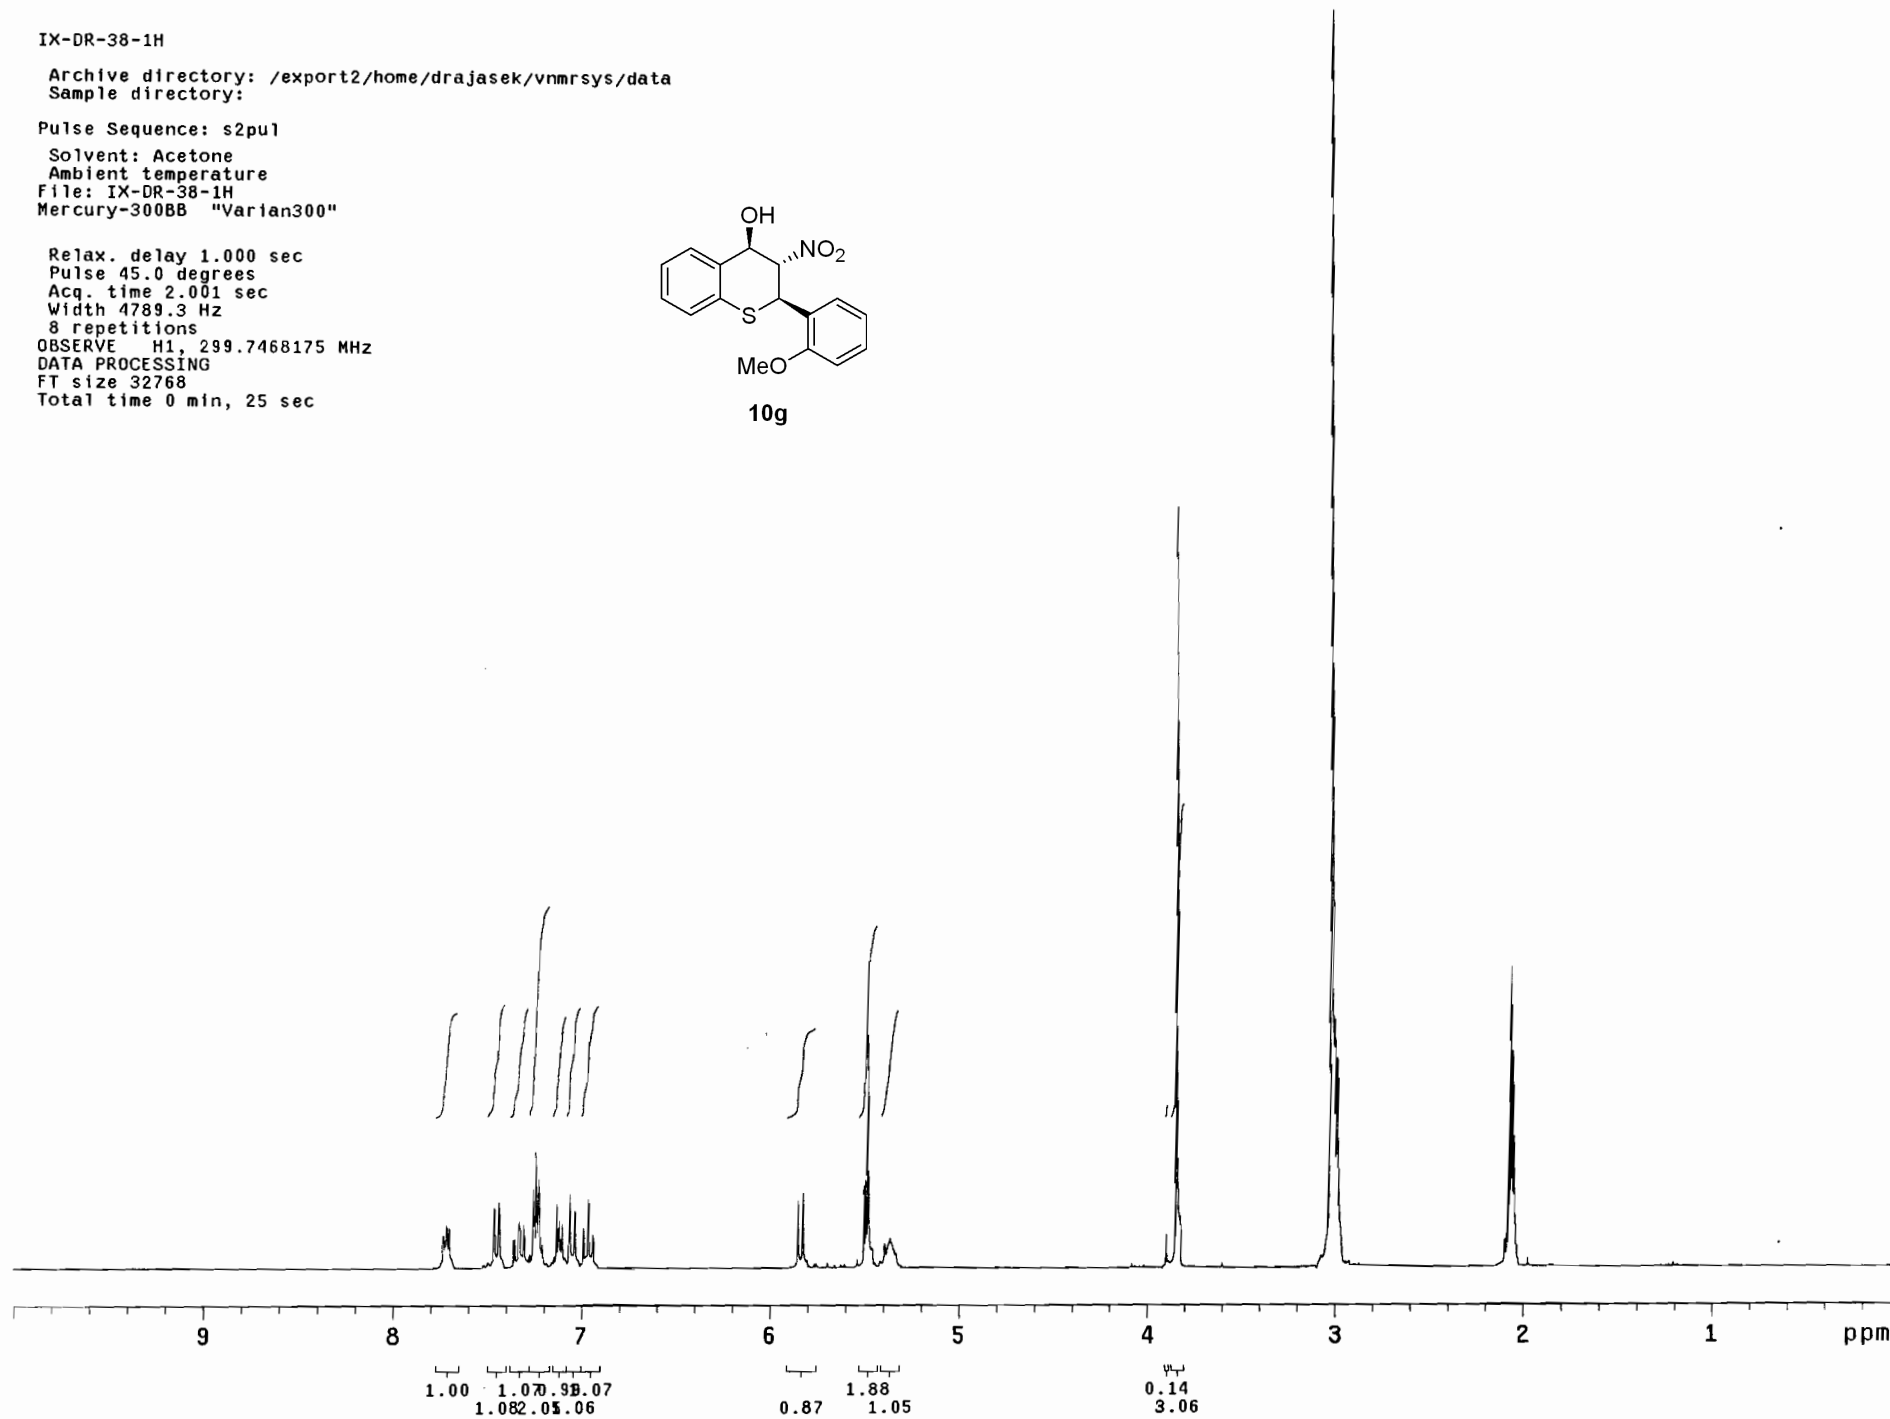

IX-DR-38-13C

Archive directory: /export2/home/drajasek/vnmrsys/data  
Sample directory:  
File: CARBON

Pulse Sequence: s2pu1

Solvent: Acetone  
Ambient temperature  
Mercury-300BB "Varian300"

Relax. delay 1.000 sec  
Pulse 45.0 degrees  
Acq. time 1.815 sec  
Width 18832.4 Hz  
12000 repetitions  
OBSERVE C13, 75.3713792 MHz  
DECOUPLE H1, 299.7483521 MHz  
Power 33 dB  
continuously on  
WALTZ-16 modulated  
DATA PROCESSING  
Line broadening 1.0 Hz  
FT size 131072  
Total time 9 hr, 42 min, 59 sec

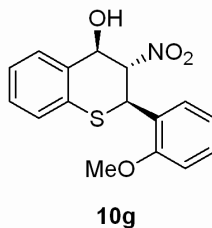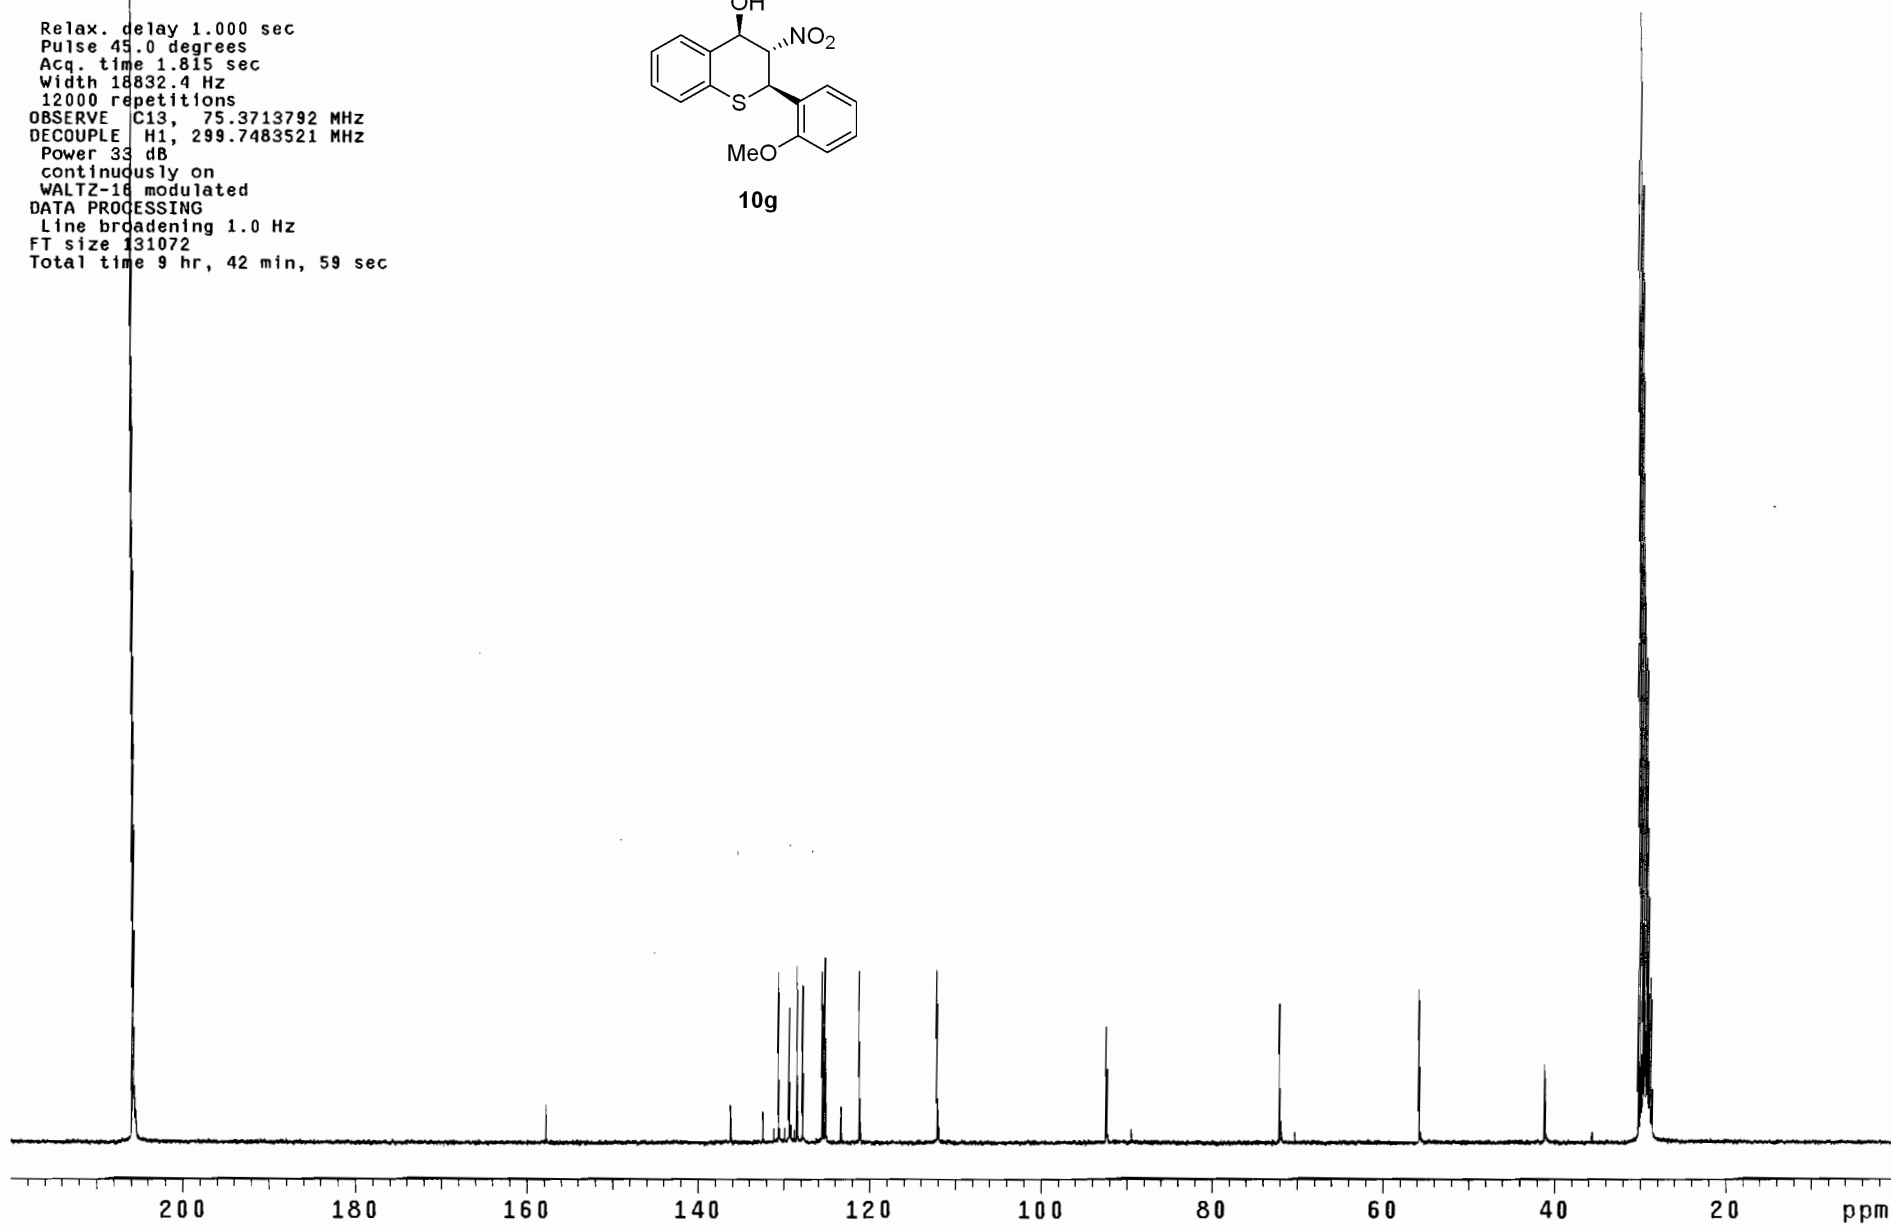

VIII-DR-145-1H

Archive directory: /home/drajasek/vnmrsys/data  
Sample directory:

Pulse Sequence: s2pul

Solvent: Acetone  
Ambient temperature  
File: VIII-DR-145-1H  
INOVA-500 "Inova500"

Relax. delay 1.000 sec  
Pulse 45.0 degrees  
Acq. time 1.892 sec  
Width 7995.2 Hz  
32 repetitions  
OBSERVE H1, 499.6778675 MHz  
DATA PROCESSING  
FT size 32768  
Total time 1 min, 32 sec

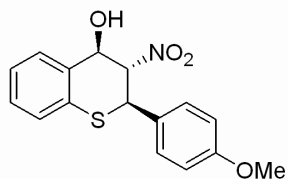

10h

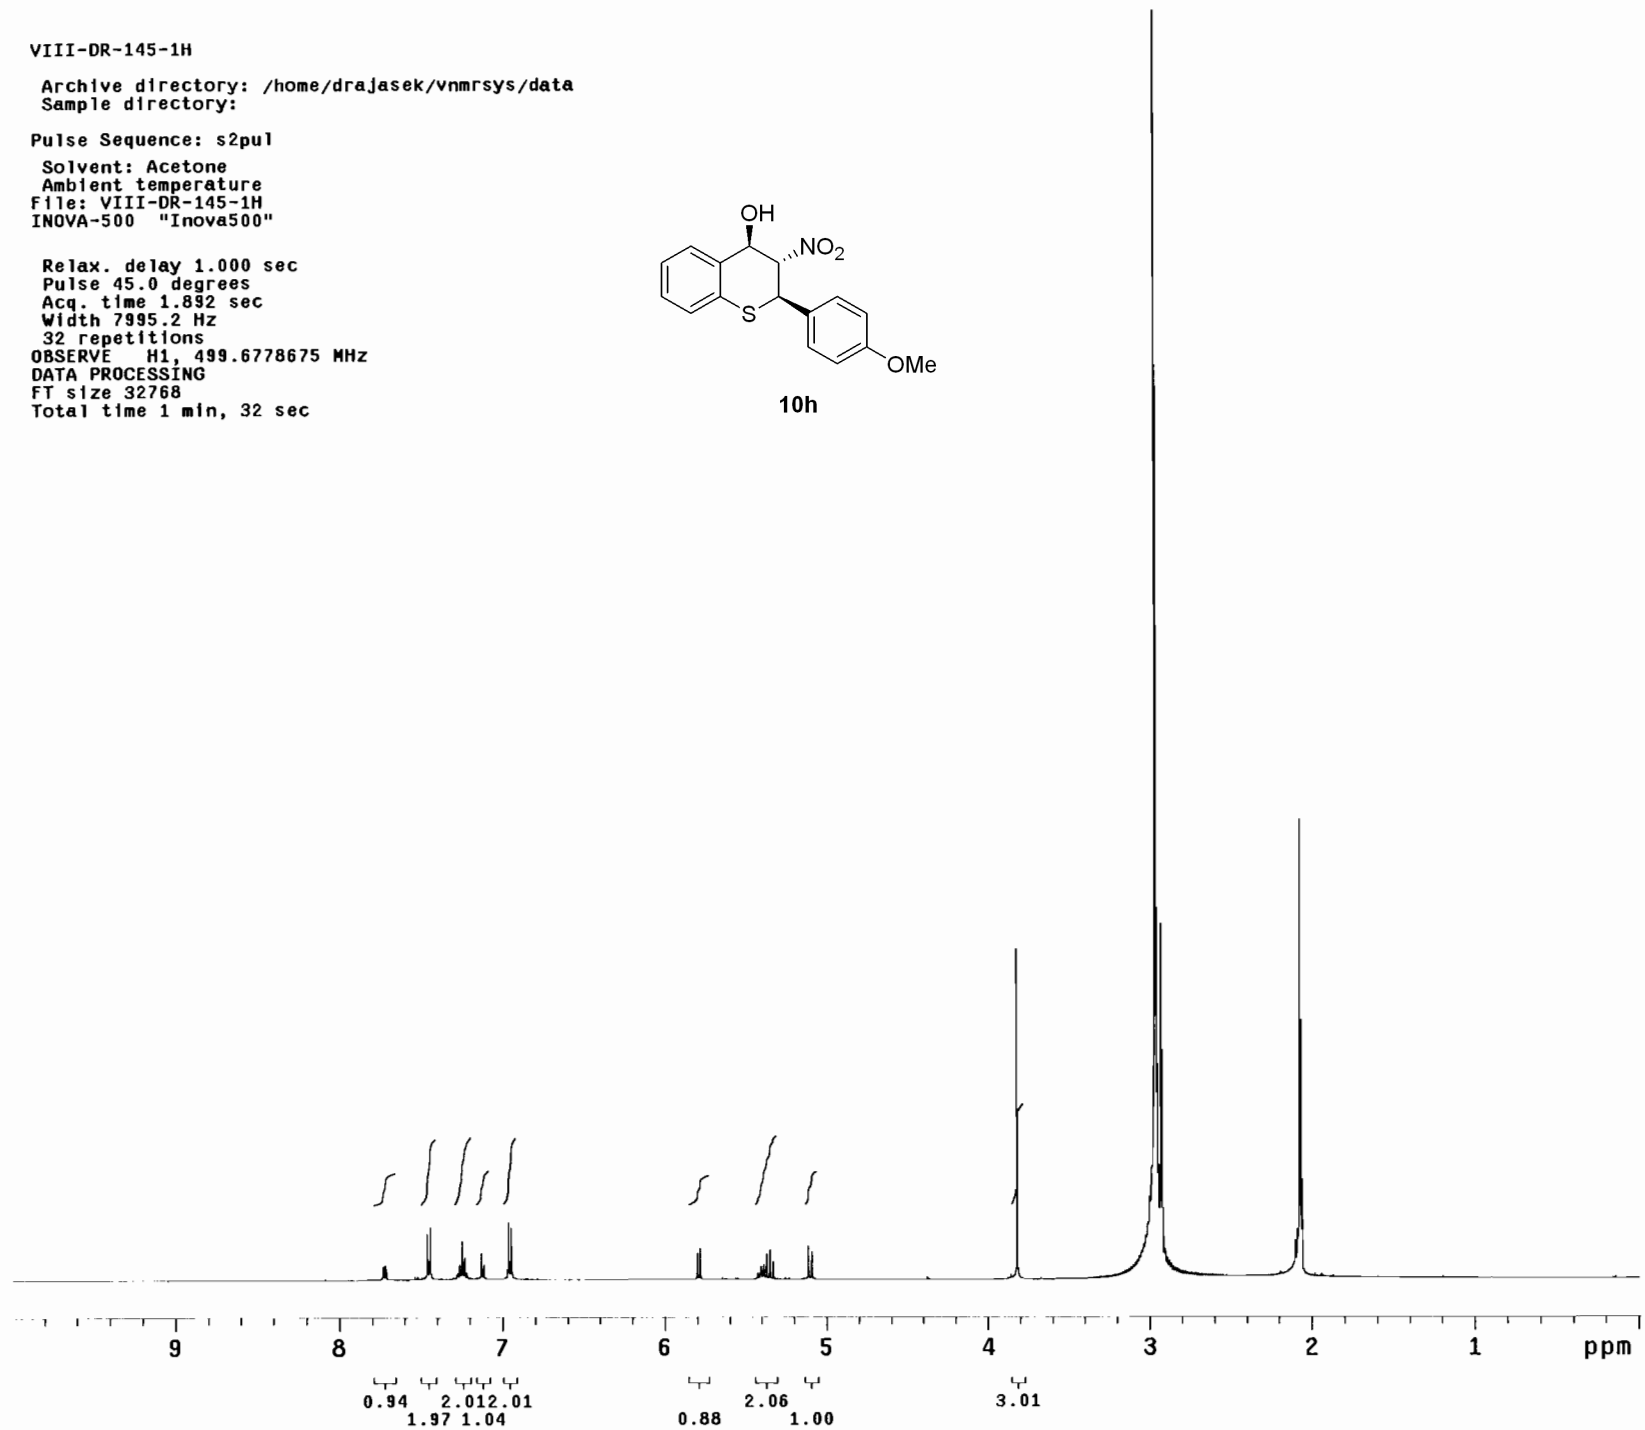

VIII-DR-145-13C

Archive directory: /home/drajasek/vnmrsys/data  
Sample directory:

Pulse Sequence: s2pul

Solvent: Acetone  
Ambient temperature

User: 1-14-87  
File: VIII-DR-145-13C  
INOVA-500 "Inova500"

Relax. delay 1.000 sec  
Pulse 45.0 degrees  
Acq. time 1.300 sec  
Width 31409.5 Hz  
20000 repetitions  
OBSERVE C13, 125.6440697 MHz  
DECOUPLE H1, 499.6803660 MHz  
Power 36 dB  
continuously on  
WALTZ-16 modulated  
DATA PROCESSING  
Line broadening 0.5 Hz  
FT size 131072  
Total time 12 hr, 49 min, 47 sec

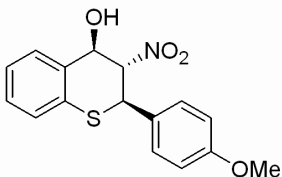

10h

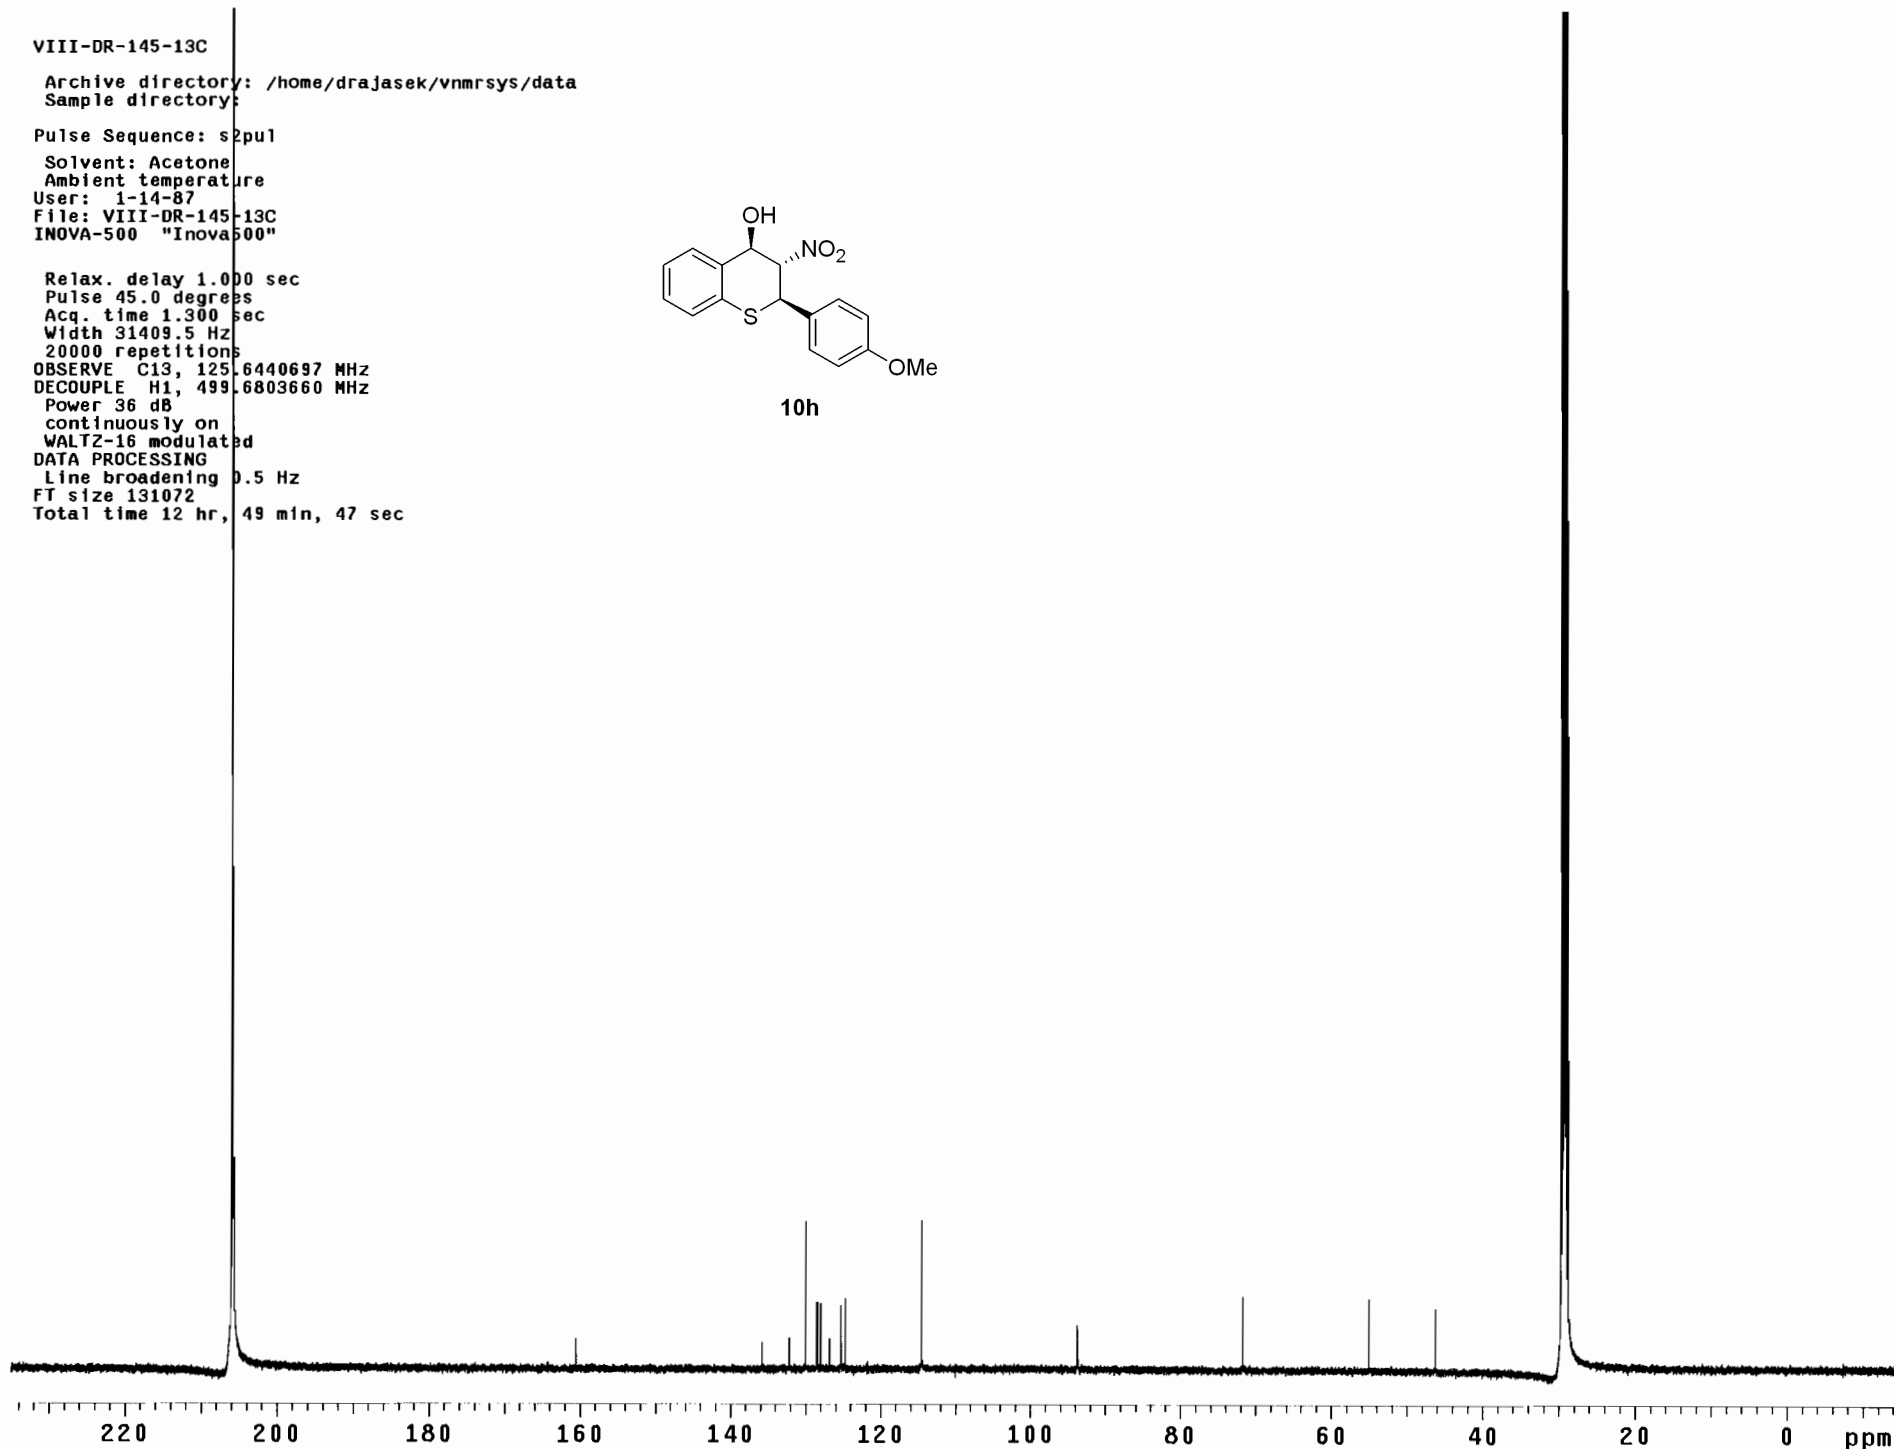

IX-DR-03-1H

Archive directory: /export2/home/drajasek/vnmrsys/data  
Sample directory:

Pulse Sequence: s2pul

Solvent: Acetone  
Ambient temperature  
File: IX-DR-03-1H-recryst  
Mercury-300BB "Varian300"

Relax. delay 1.000 sec  
Pulse 45.0 degrees  
Acq. time 2.001 sec  
Width 4789.3 Hz  
32 repetitions  
OBSERVE H1, 299.7468175 MHz  
DATA PROCESSING  
FT size 32768  
Total time 1 min, 39 sec

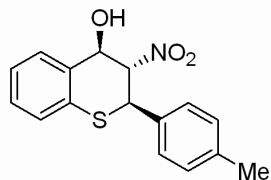

10i

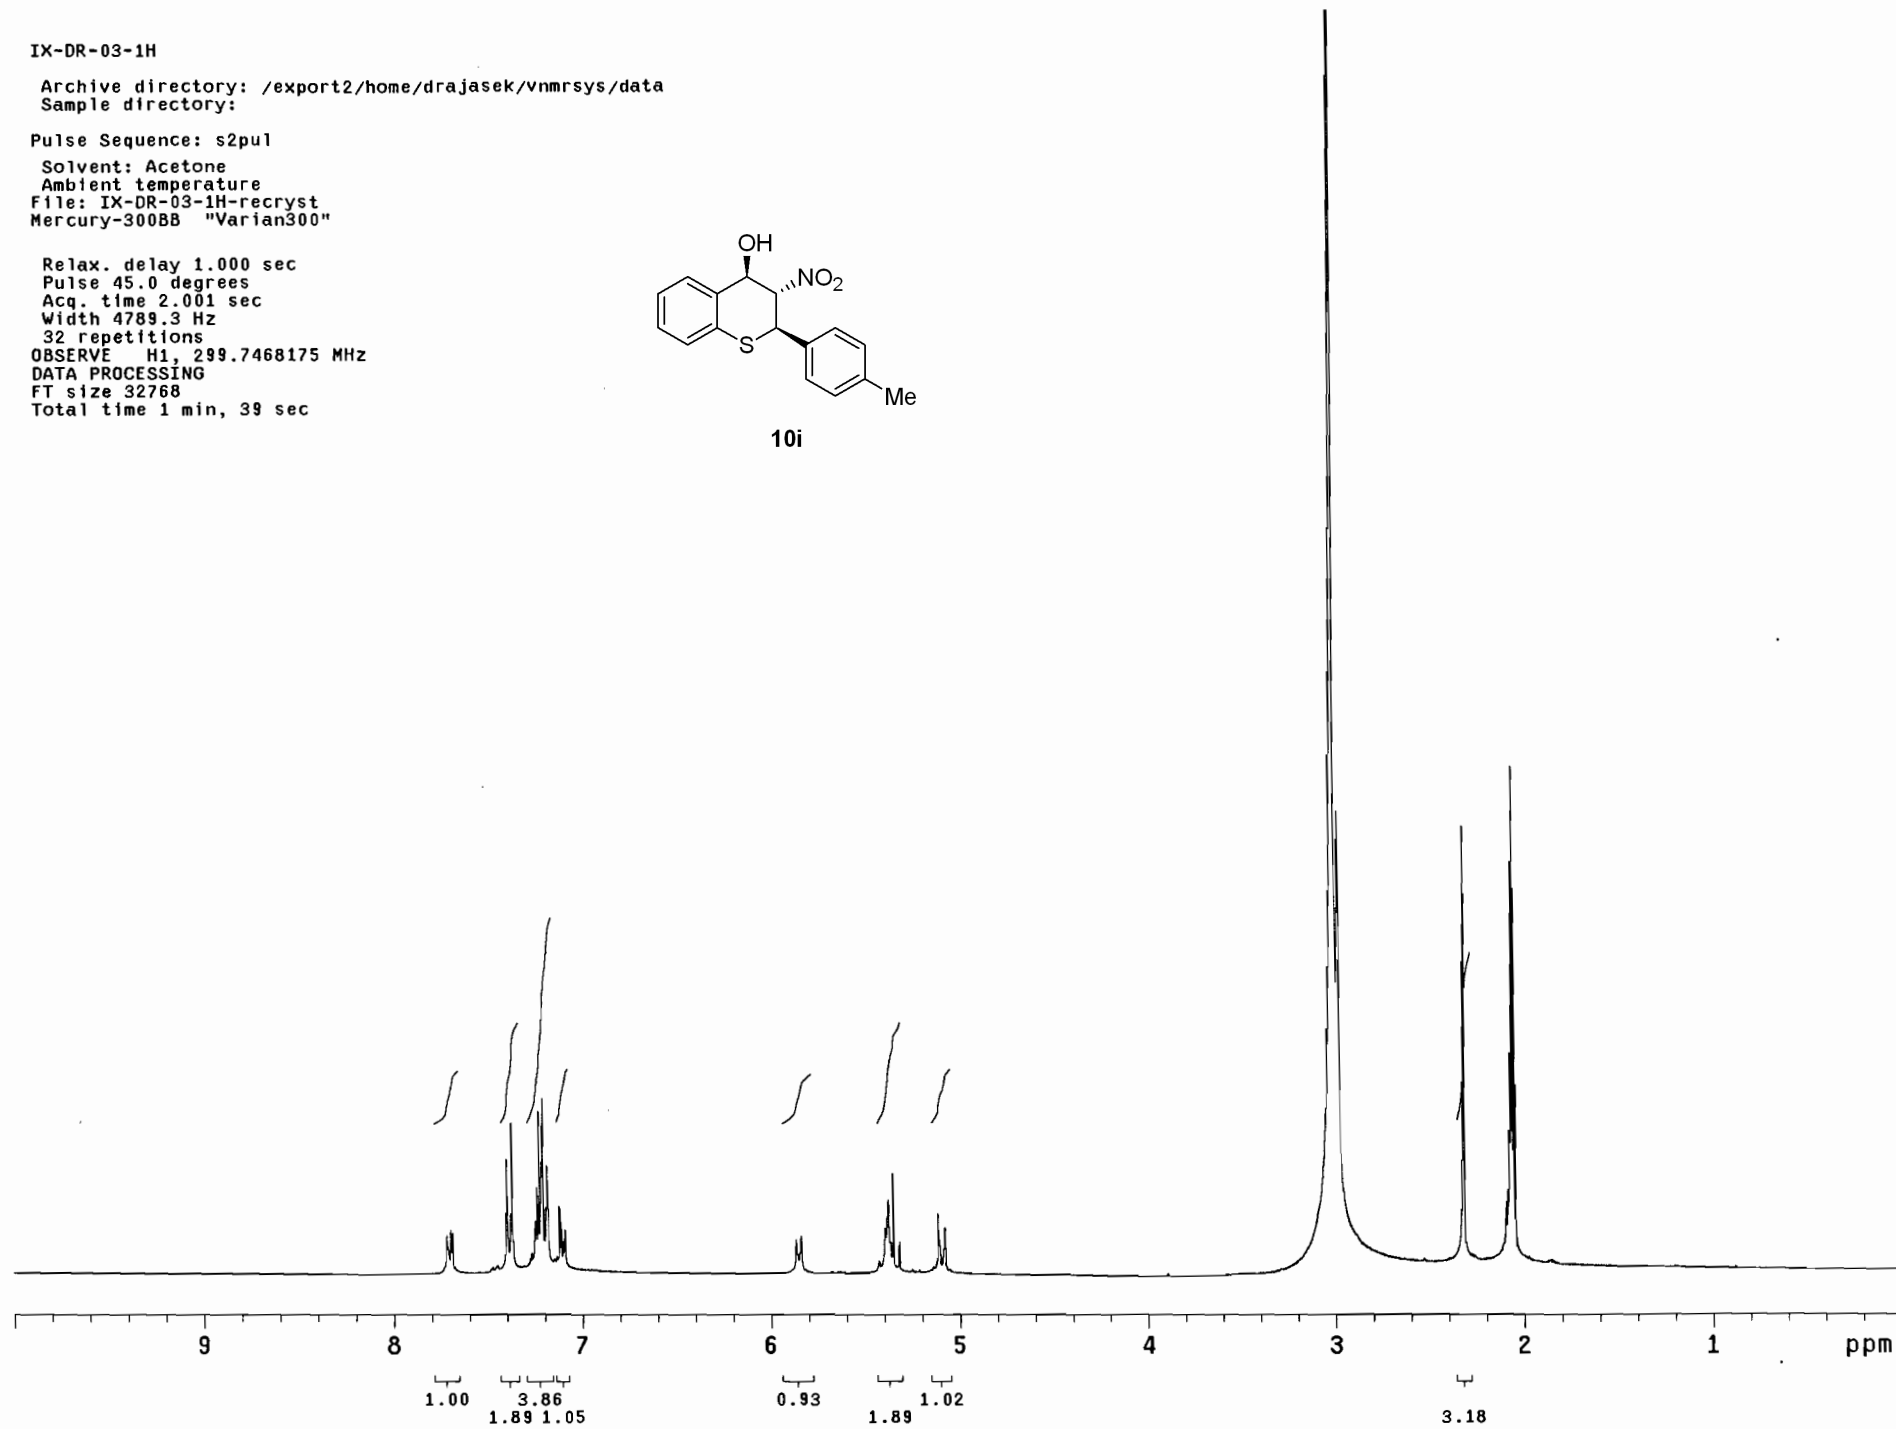

IX-DR-03-13C

Archive directory: /export2/home/drajasek/vnmrsys/data  
Sample directory:

Pulse Sequence: s2pu1

Solvent: Acetone  
Ambient temperature  
File: IX-DR-4-Mecomound  
Mercury-300BB "Varian300"

Relax. delay 1.000 sec  
Pulse 45.0 degrees  
Acq. time 1.815 sec  
Width 18832.4 Hz  
13000 repetitions  
OBSERVE C13, 75.3713792 MHz  
DECOUPLE H1, 299.7483521 MHz  
Power 33 dB  
continuously on  
WALTZ-16 modulated  
DATA PROCESSING  
Line broadening 1.0 Hz  
FT size 131072  
Total time 10 hr, 31 min, 33 sec

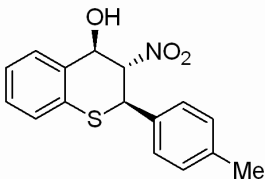

10i

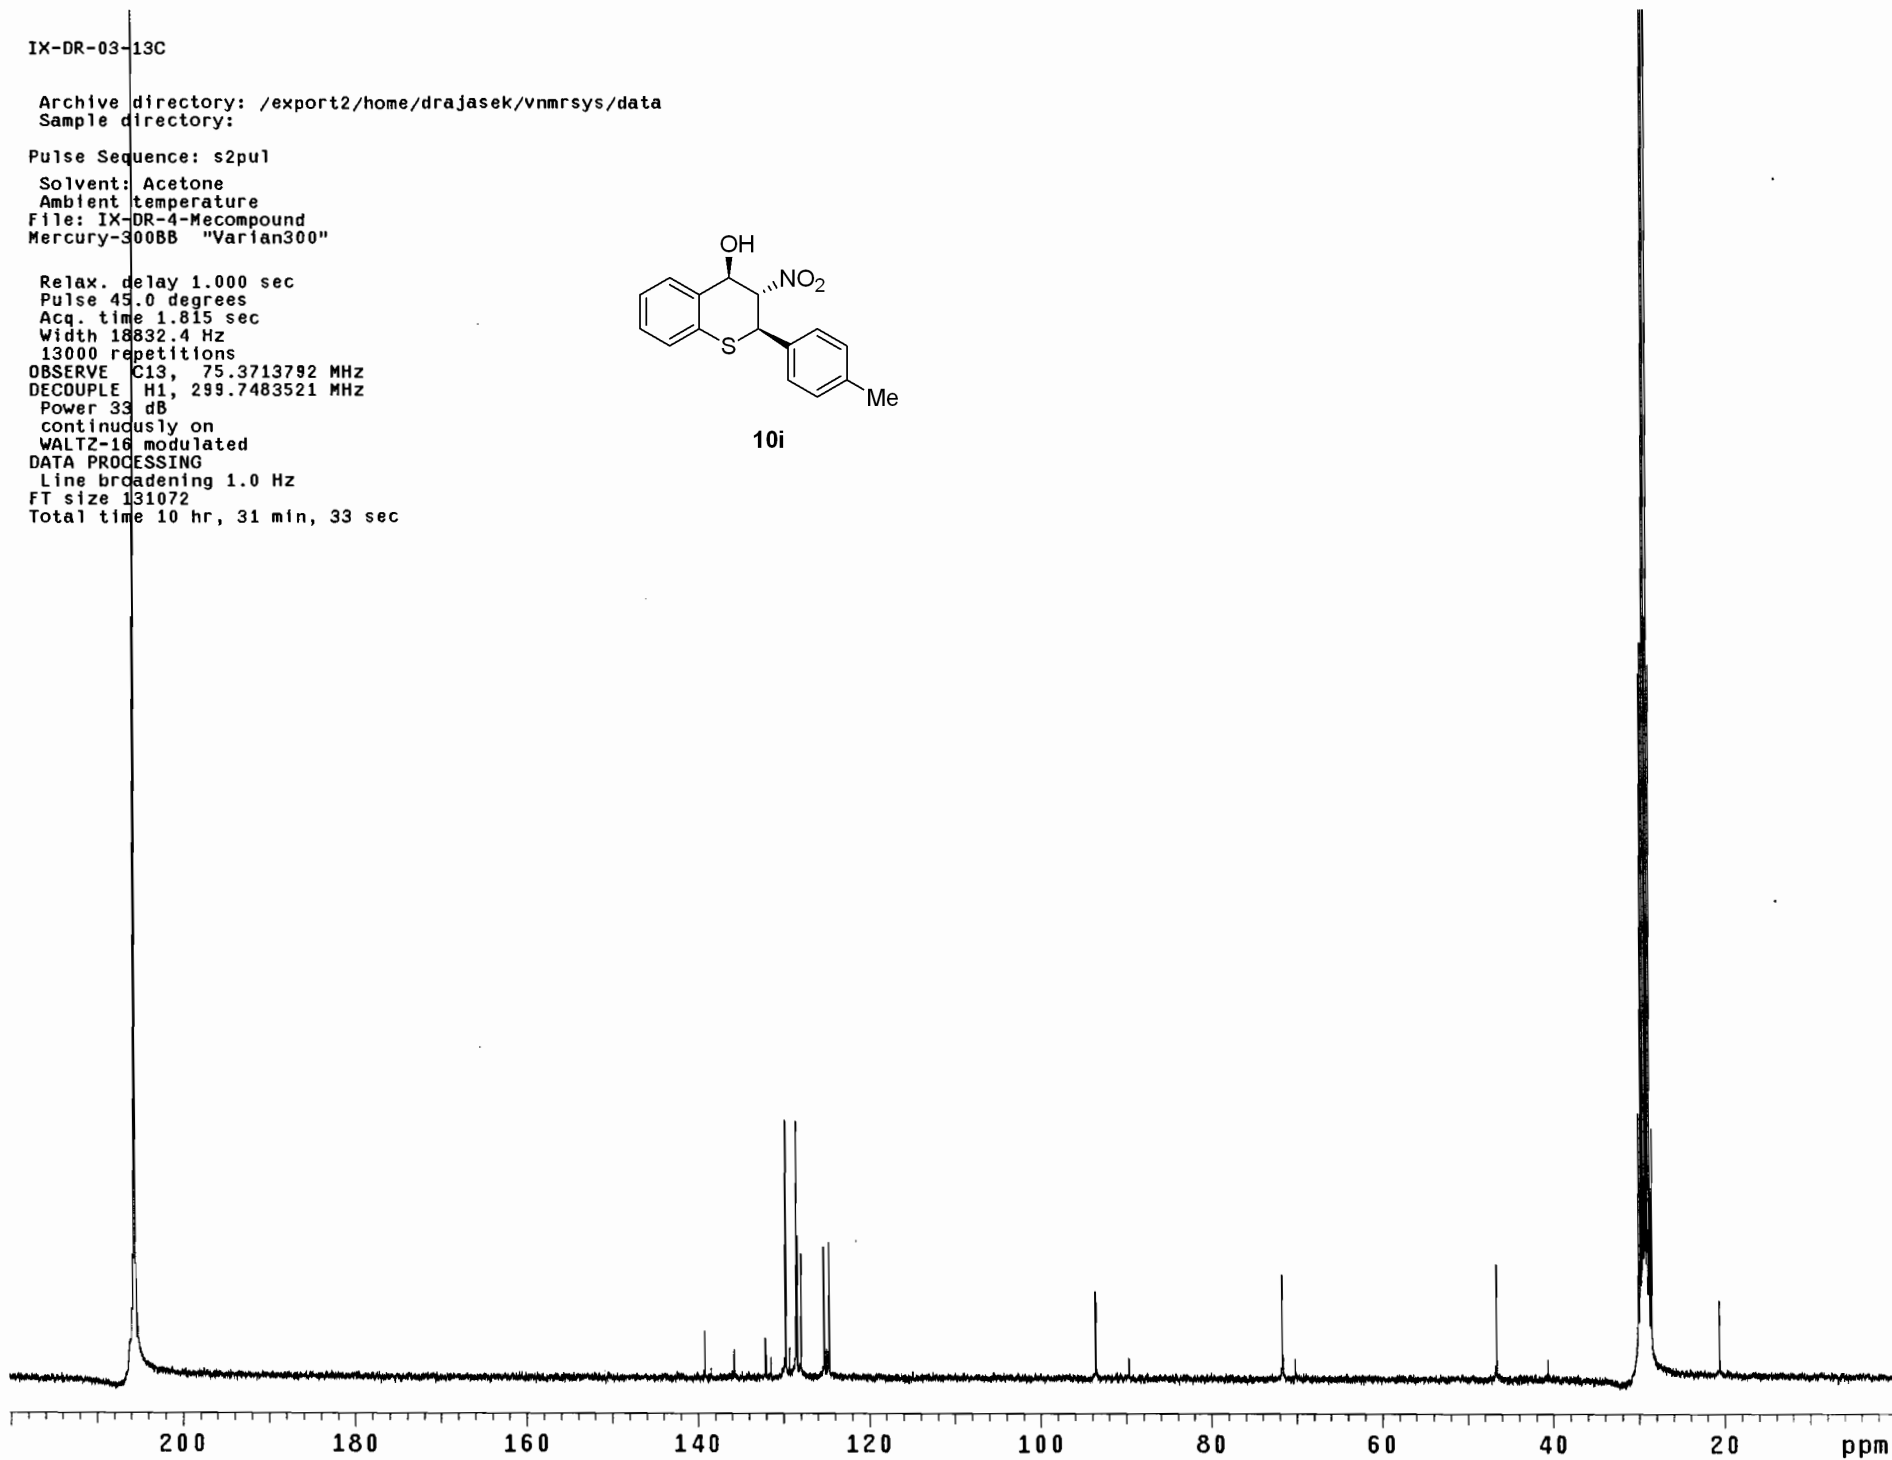



IX-DR-16-1H

Archive directory: /export2/home/drajasek/vnmrsys/data  
Sample directory:

Pulse Sequence: s2pu1

Solvent: Acetone  
Ambient temperature  
File: IX-DR-16-1Ha  
Mercury-300BB "Varian300"

Relax. delay 1.000 sec  
Pulse 45.0 degrees  
Acq. time 2.001 sec  
Width 4789.3 Hz  
8 repetitions  
OBSERVE H1, 299.7468175 MHz  
DATA PROCESSING  
FT size 32768  
Total time 0 min, 25 sec

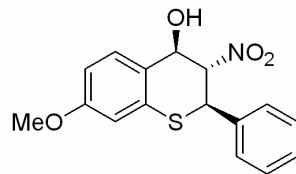

10j

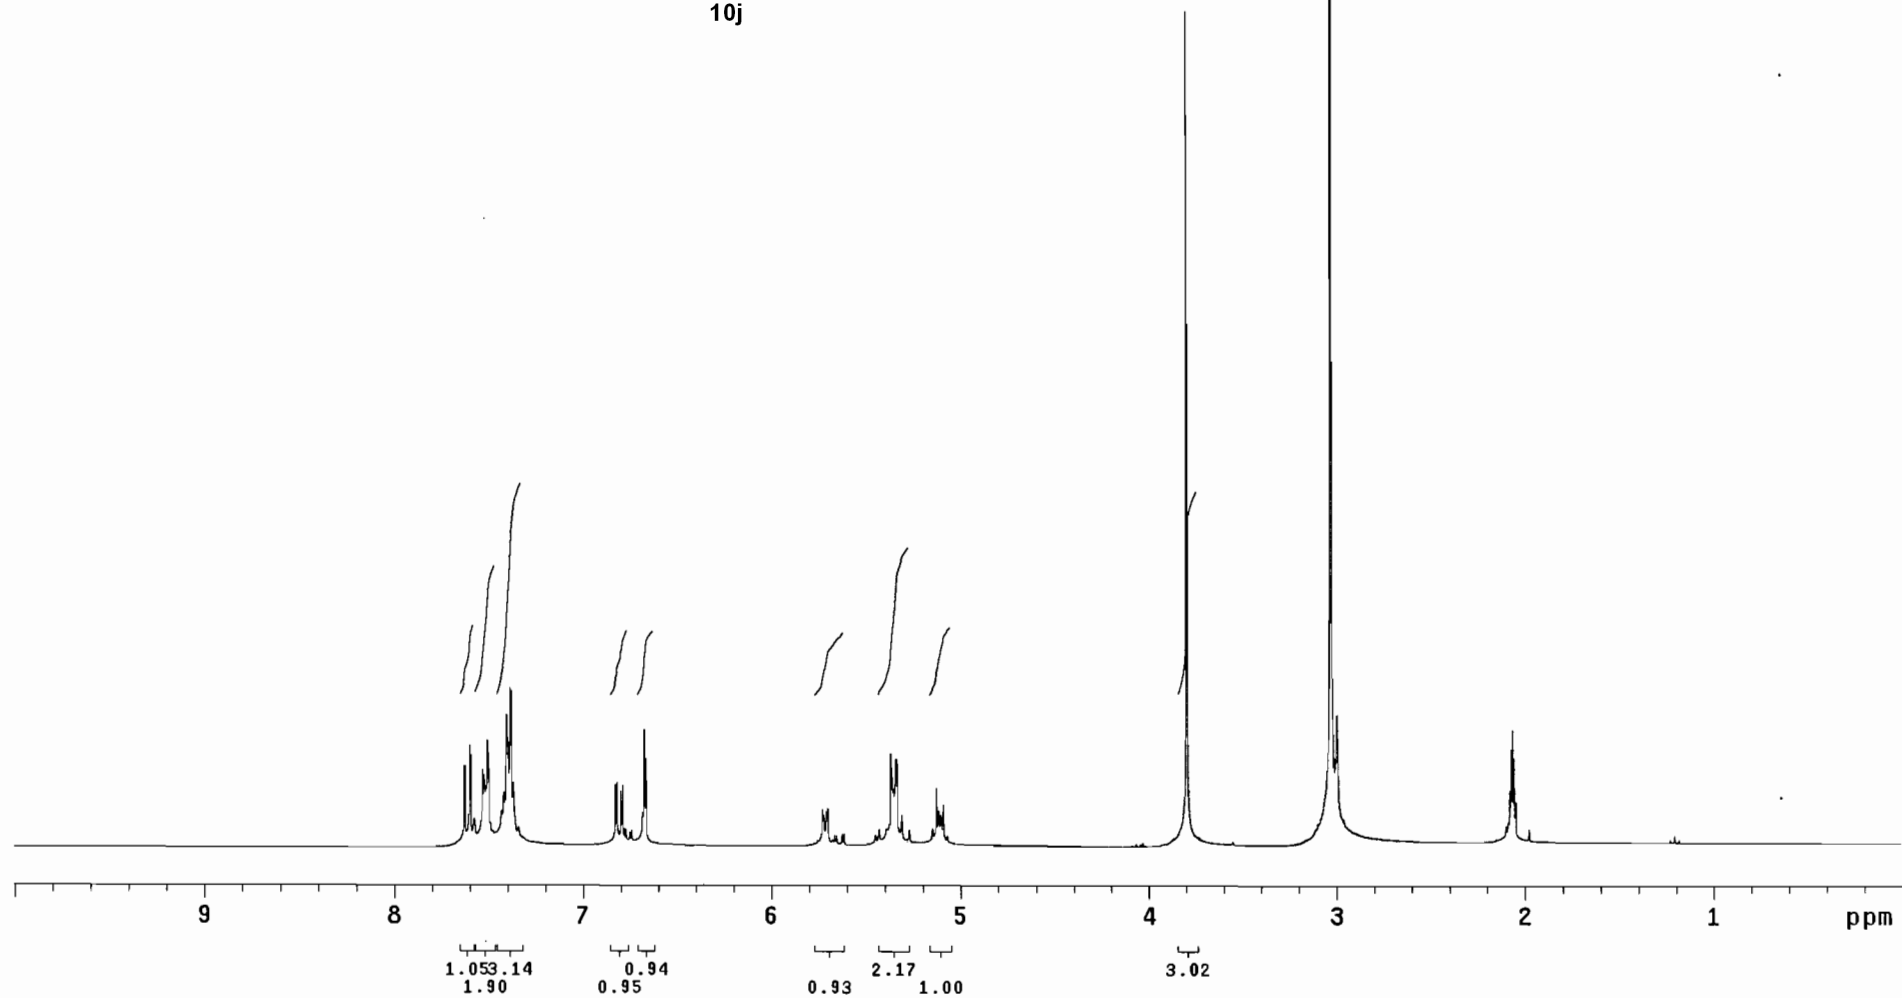

IX-DR-16-13C

Archive directory: /export2/home/drajasek/vnmrsys/data  
Sample directory:

Pulse Sequence: s2pu1

Solvent: Acetone  
Ambient temperature  
File: IX-DR-16-13Ca  
Mercury-300BB "Varian300"

Relax. delay 1.000 sec  
Pulse 45.0 degrees  
Acq. time 1.815 sec  
Width 18832.4 Hz  
7000 repetitions  
OBSERVE C13, 75.3713792 MHz  
DECOUPLE H1, 299.7483521 MHz  
Power 33 dB  
continuously on  
WALTZ-16 modulated  
DATA PROCESSING  
Line broadening 1.0 Hz  
FT size 131072  
Total time 5 hr, 40 min, 18 sec

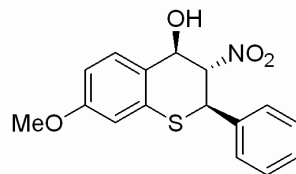

10j

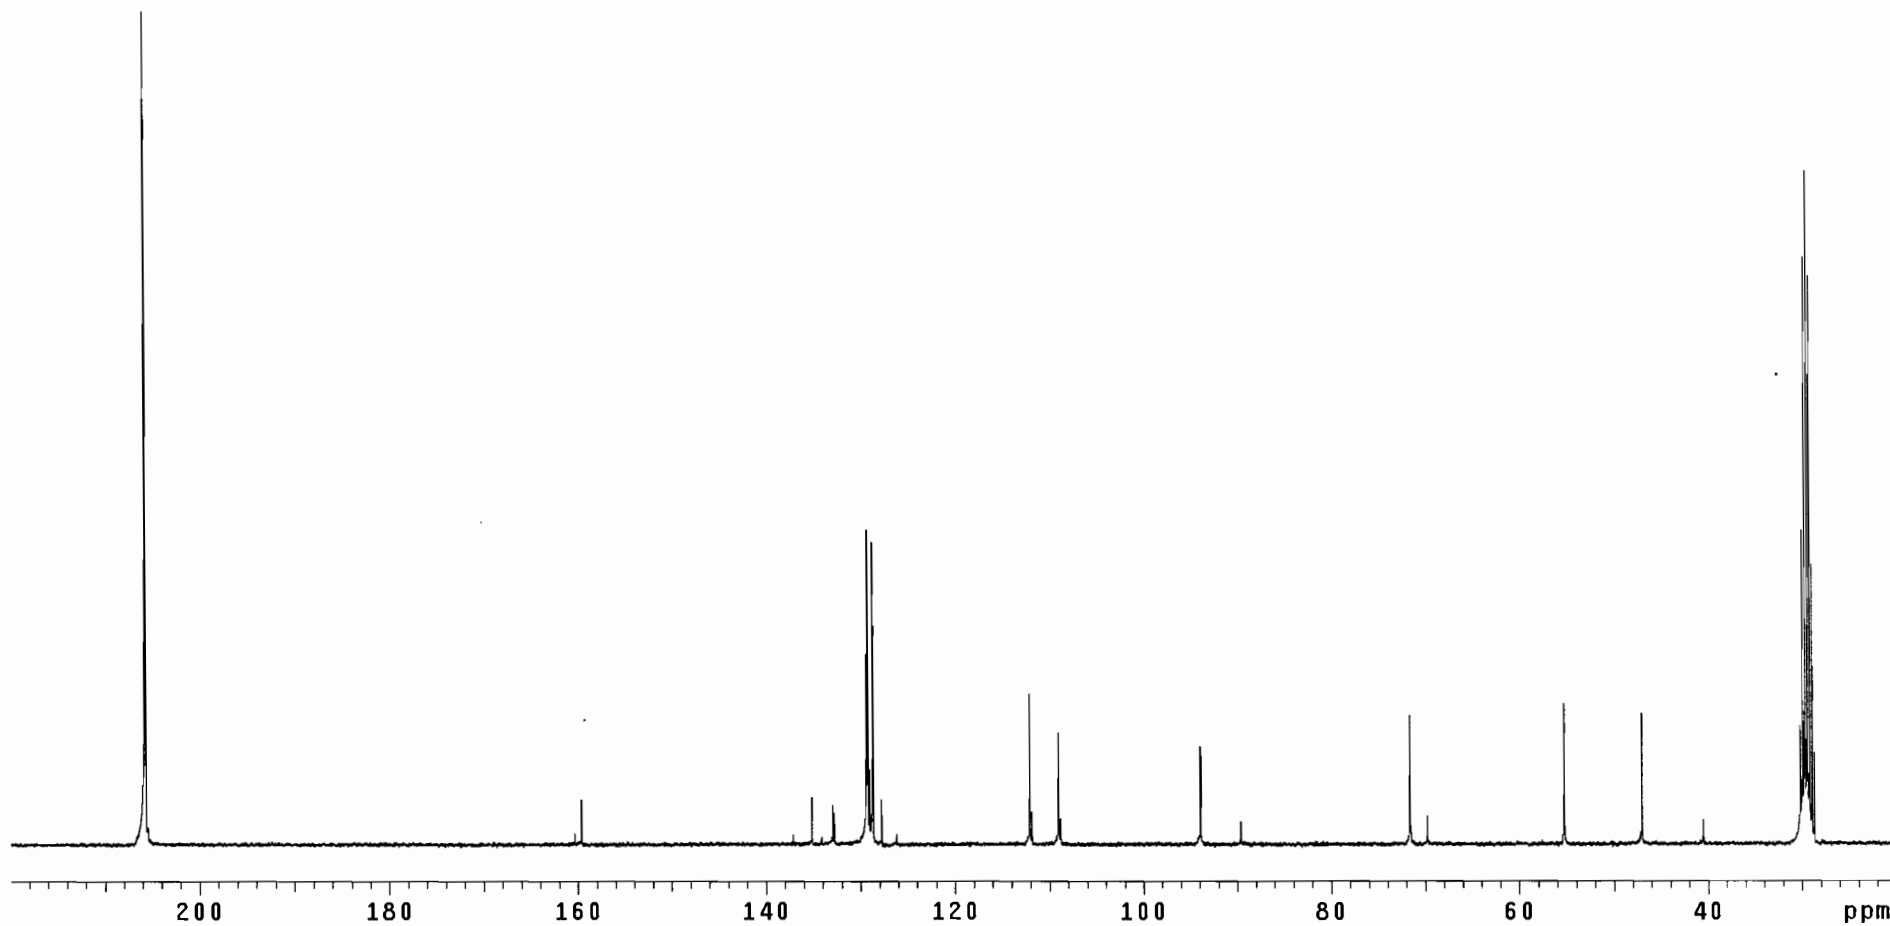

IX-DR-14-1H

Archive directory: /export2/home/drajasek/vnmrsys/data  
Sample directory:

Pulse Sequence: s2pu1  
Solvent: Acetone  
Ambient temperature  
File: IX-DR-14-1H  
Mercury-300BB "Varian300"

Relax. delay 1.000 sec  
Pulse 45.0 degrees  
Acq. time 2.001 sec  
Width 4789.3 Hz  
8 repetitions  
OBSERVE H1, 299.7468175 MHz  
DATA PROCESSING  
FT size 32768  
Total time 0 min, 25 sec

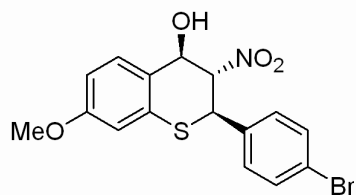

10k

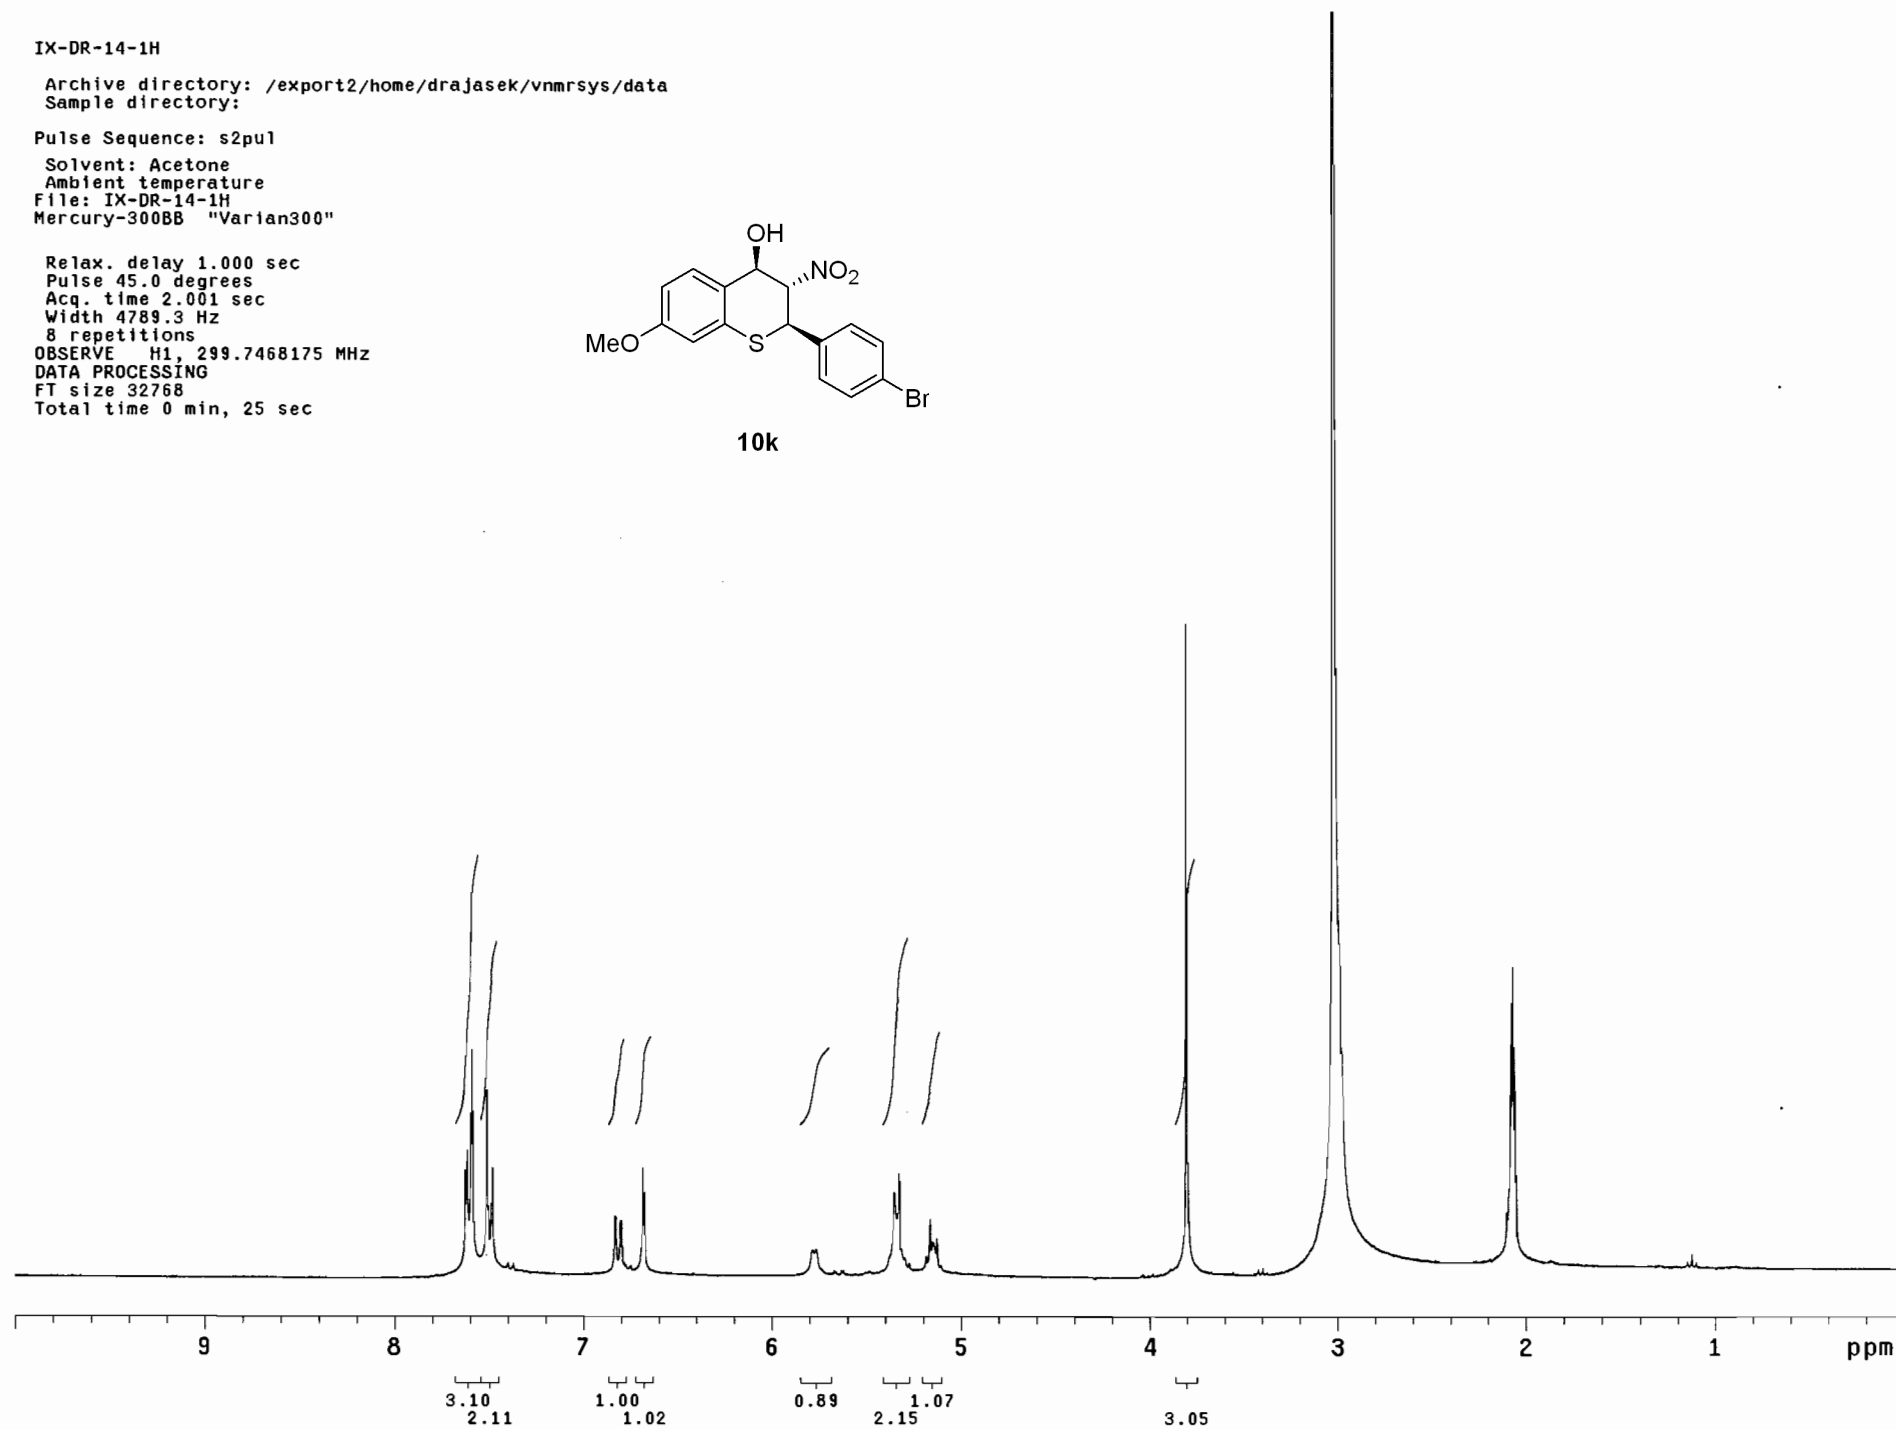

IX-DR-14-13C

Archive directory: /export2/home/drajasek/vnmrsys/data

Sample directory:

Pulse Sequence: s2pul

Solvent: Acetone

Ambient temperature

File: IX-DR-14-13C

Mercury-300BB "Varian300"

Relax. delay 1.000 sec

Pulse 45.0 degrees

Acq. time 1.815 sec

Width 18832.4 Hz

5000 repetitions

OBSERVE C13, 75.8713792 MHz

DECOUPLE H1, 299.7483521 MHz

Power 33 dB

continuously on

WALTZ-16 modulated

DATA PROCESSING

Line broadening 1.0 Hz

FT size 131072

Total time 4 hr, 3 min, 14 sec

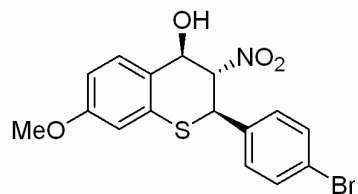

10k

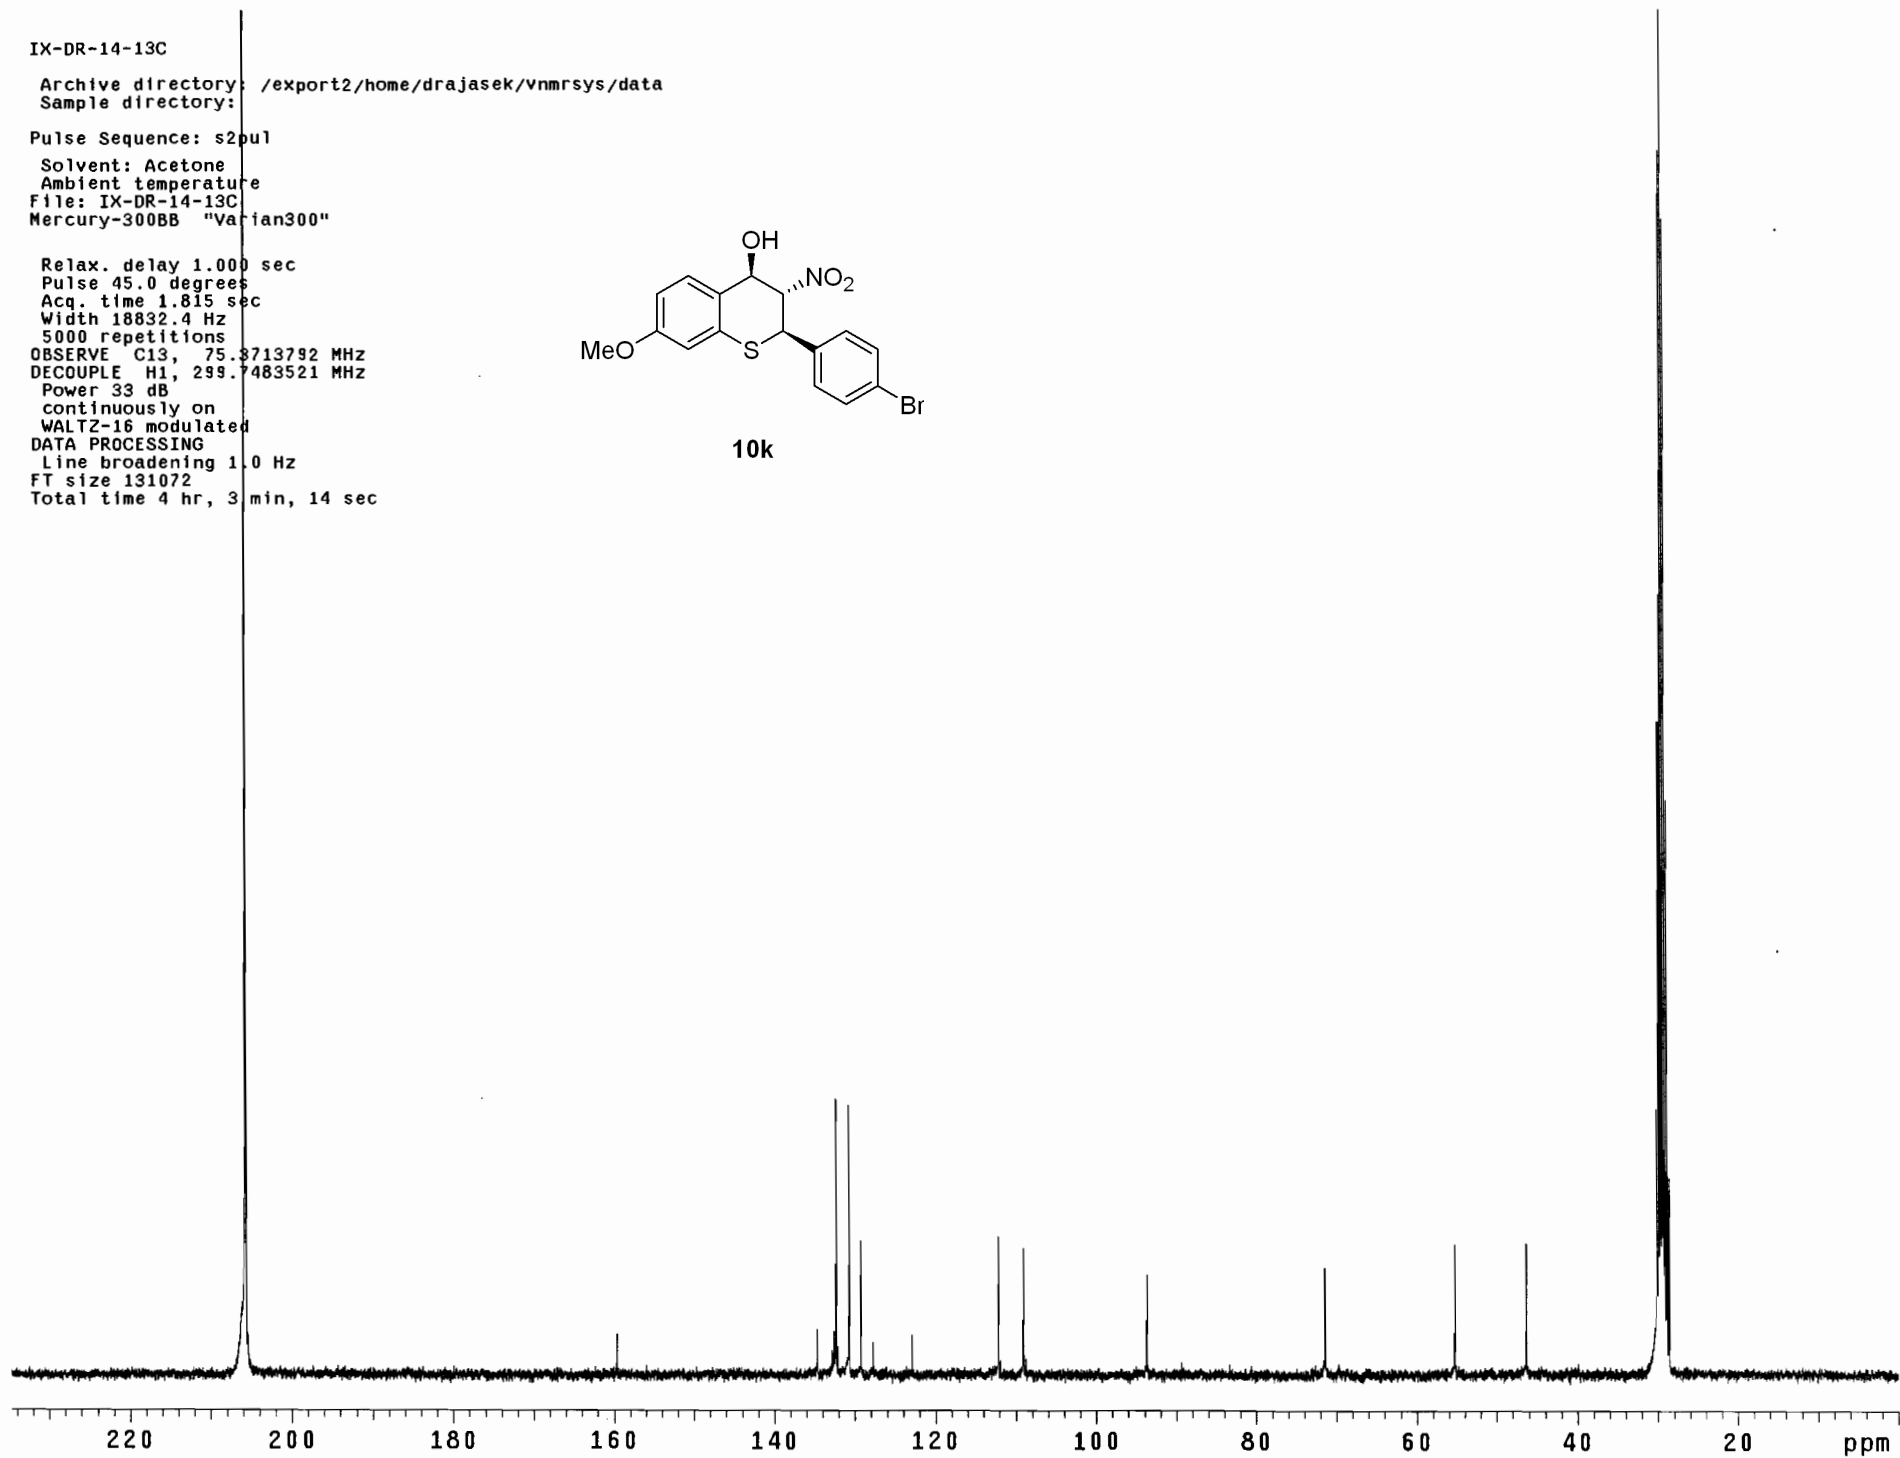

IX-DR-20-1H

Archive directory: /export2/home/drajasek/vnmrsys/data  
Sample directory:

Pulse Sequence: s2pu1

Solvent: Acetone  
Ambient temperature  
File: IX-DR-20-1H  
Mercury-300BB "Varian300"

Relax. delay 1.000 sec  
Pulse 45.0 degrees  
Acq. time 2.001 sec  
Width 4789.3 Hz  
8 repetitions  
OBSERVE H1, 299.7469979 MHz  
DATA PROCESSING  
FT size 32768  
Total time 0 min, 25 sec

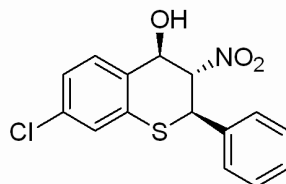

10I

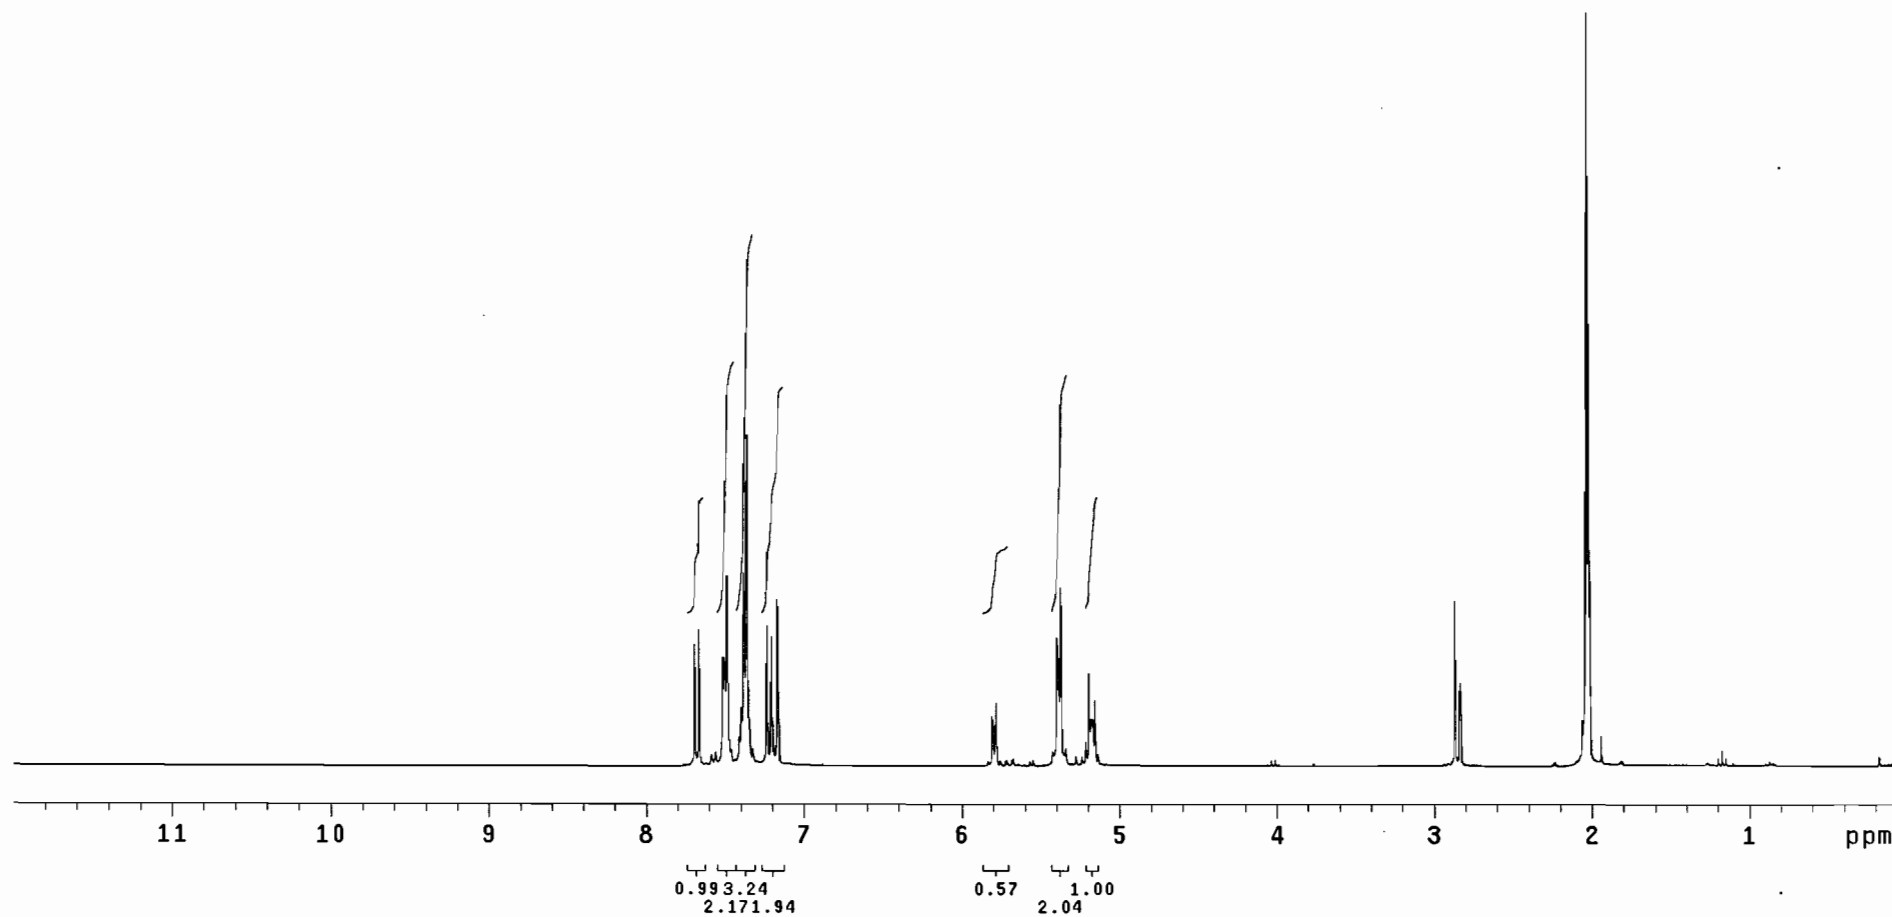

IX-DR-20-13C

Archive directory: /export2/home/drajasek/vnmrsys/data  
Sample directory:

Pulse Sequence: s2pu1

Solvent: Acetone  
Ambient temperature  
File: IX-DR-20-13C  
Mercury-300BB "Varian300"

Relax. delay 1.000 sec  
Pulse 45.0 degrees  
Acq. time 1.815 sec  
Width 18832.4 Hz  
10000 repetitions  
OBSERVE C13, 75.3714038 MHz  
DECOUPLE H1, 299.7483521 MHz  
Power 33 dB  
continuously on  
WALTZ-16 modulated  
DATA PROCESSING  
Line broadening 1.0 Hz  
FT size 131072  
Total time 8 hr, 5 min, 55 sec

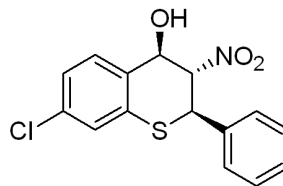

101

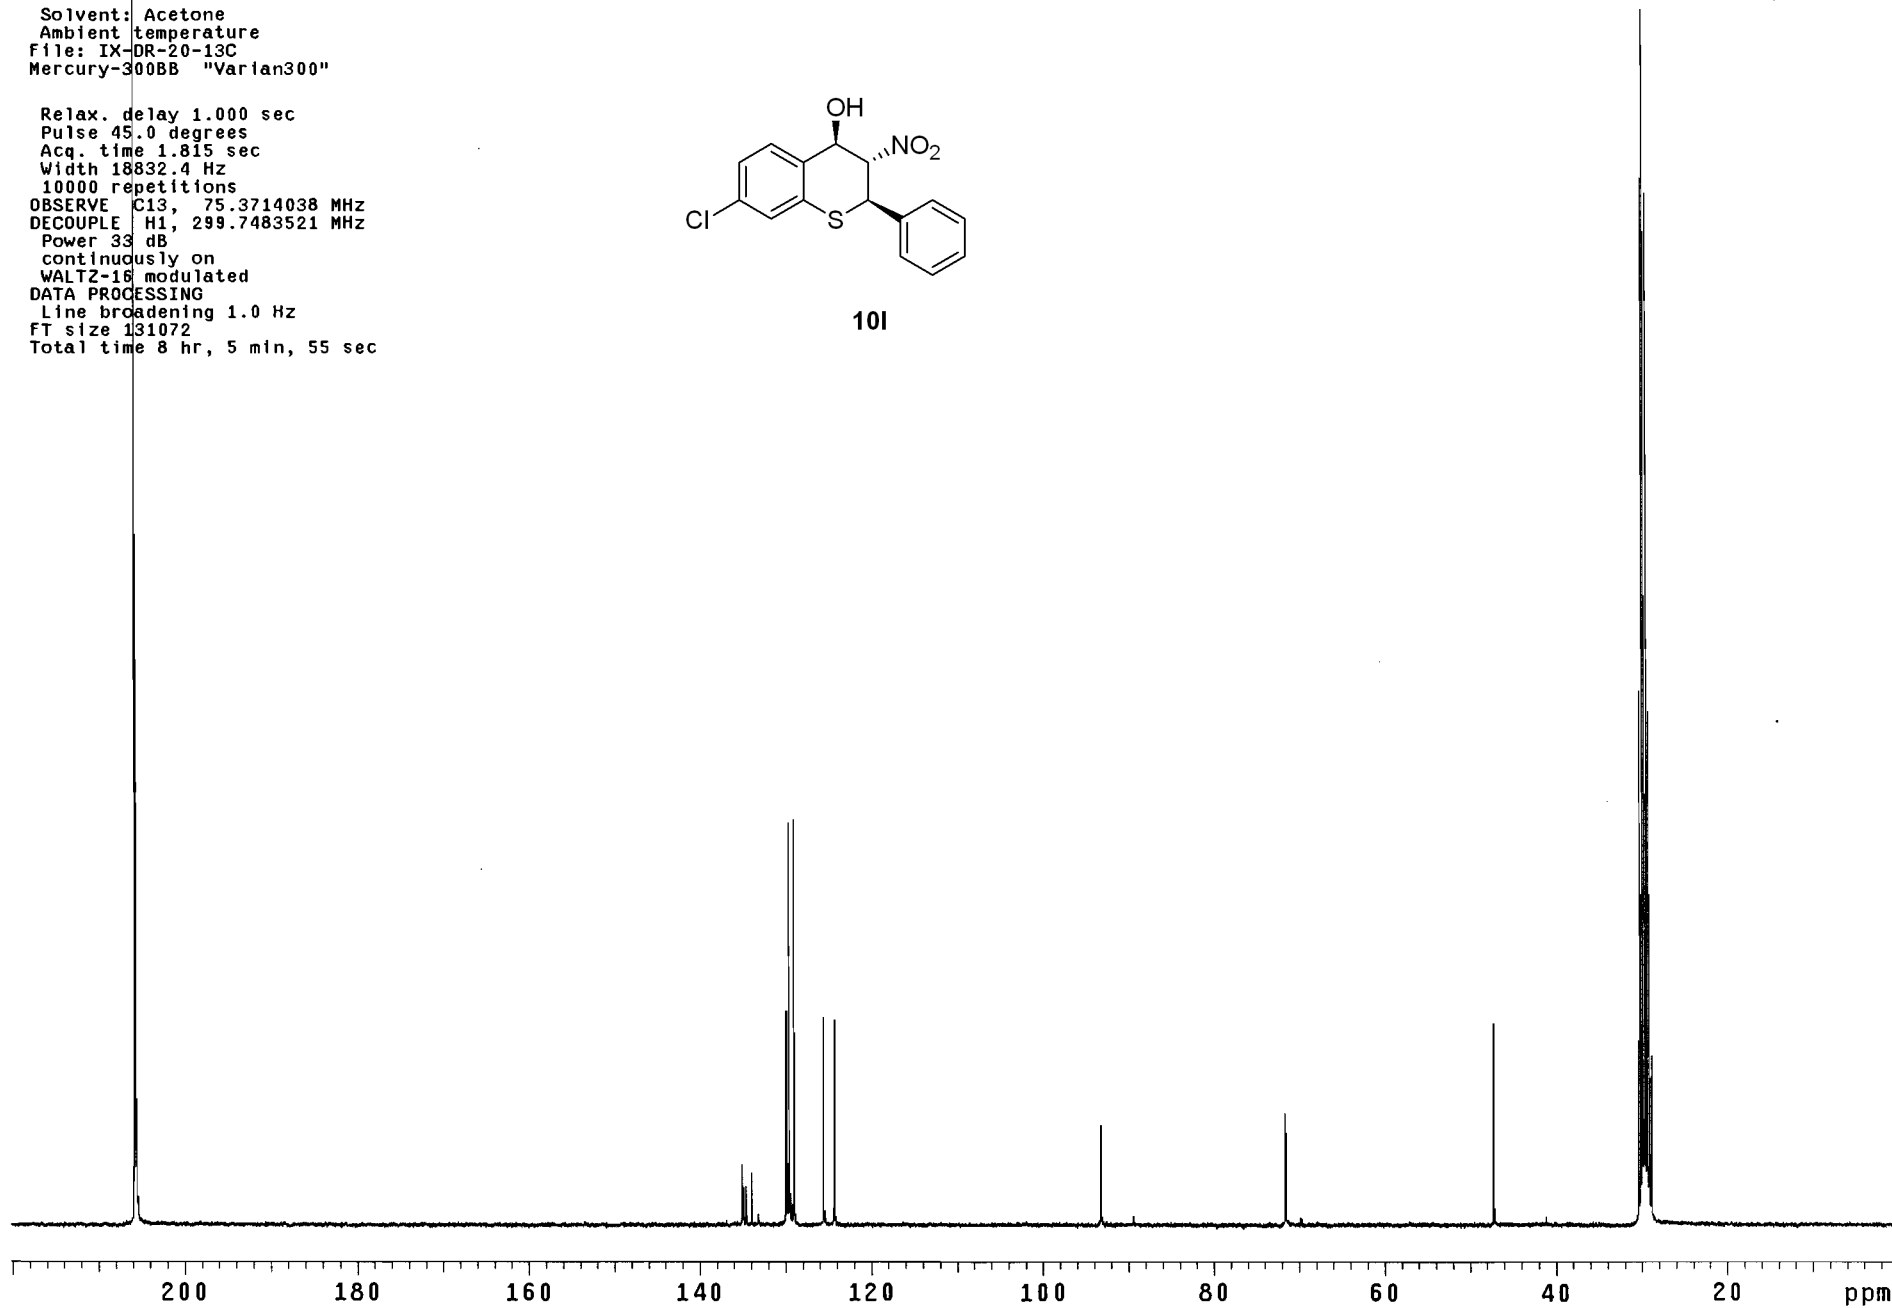

## Area % Report

**Method Name:** C:\EZStart\Projects\Default\Methods\AS.met  
**Data:** C:\EZStart\Projects\Default\Data\VIII-DR-84-B  
**User:** System  
**Acquired:** 3/21/2007 11:57:54 AM  
**Printed:** 5/16/2007 2:10:38 PM

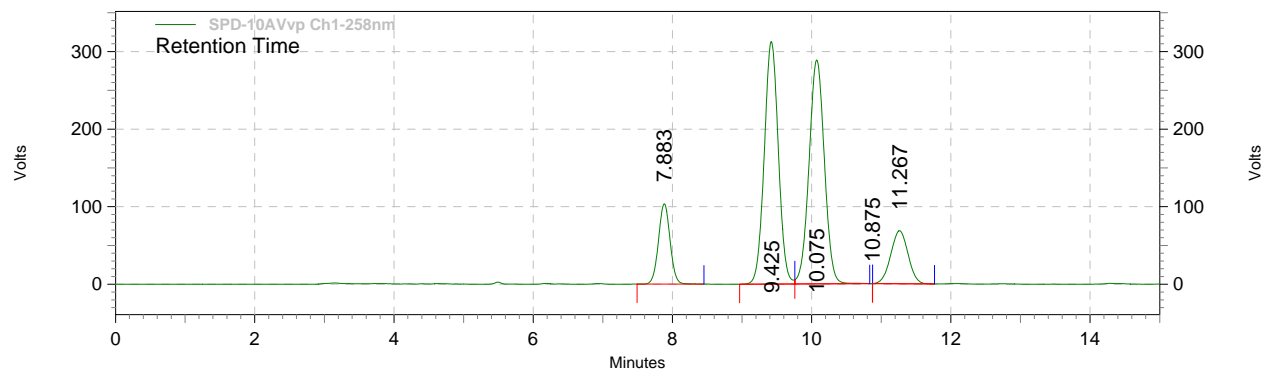

### SPD-10AVvp Ch1-258nm Results

| Retention Time | Area     | Area % | Height | Height % |
|----------------|----------|--------|--------|----------|
| 7.883          | 1197571  | 10.68  | 103625 | 13.41    |
| 9.425          | 4401885  | 39.27  | 312347 | 40.41    |
| 10.075         | 4430923  | 39.53  | 288675 | 37.35    |
| 10.875         | 0        | 0.00   | 0      | 0.00     |
| 11.267         | 1178436  | 10.51  | 68292  | 8.84     |
| Totals         | 11208815 | 100.00 | 772939 | 100.00   |

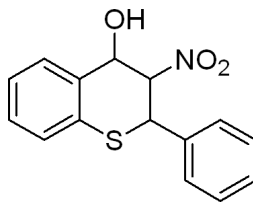

**10a, racemic**

## Area % Report

**Method Name:** C:\EZStart\Projects\Default\Methods\AS.met  
**Data:** C:\EZStart\Projects\Default\Data\VIII-DR-146-2  
**User:** System  
**Acquired:** 4/15/2007 11:43:43 AM  
**Printed:** 5/16/2007 2:11:11 PM

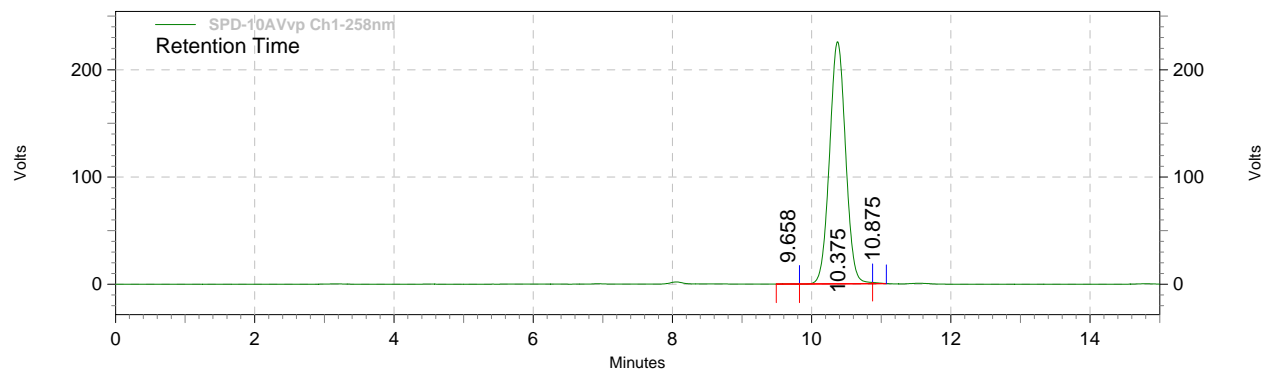

**SPD-10AVvp**  
**Ch1-258nm**  
**Results**

| Retention Time | Area    | Area % | Height | Height % |
|----------------|---------|--------|--------|----------|
| 9.658          | 788     | 0.02   | 112    | 0.05     |
| 10.375         | 3604068 | 99.81  | 225665 | 99.49    |
| 10.875         | 6129    | 0.17   | 1049   | 0.46     |
| Totals         | 3610985 | 100.00 | 226826 | 100.00   |

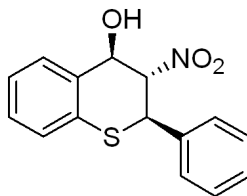

**10a, >99%ee**



## Area % Report

**Method Name:** C:\EZStart\Projects\Default\Methods\AS.met  
**Data:** C:\EZStart\Projects\Default\Data\VIII-DR-148-B  
**User:** System  
**Acquired:** 4/16/2007 9:25:42 AM  
**Printed:** 5/16/2007 2:11:38 PM

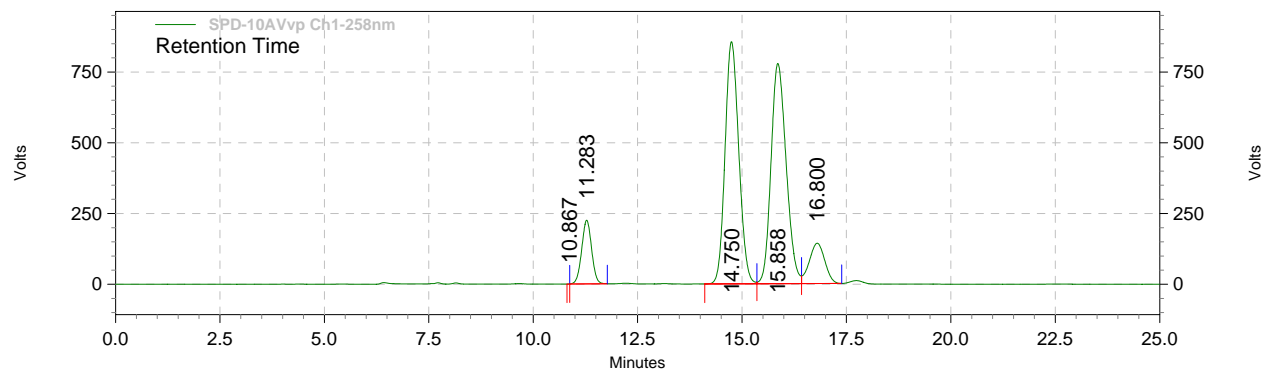

### SPD-10AVvp Ch1-258nm Results

| Retention Time | Area            | Area %        | Height         | Height %      |
|----------------|-----------------|---------------|----------------|---------------|
| 10.867         | 519             | 0.00          | 289            | 0.01          |
| 11.283         | 3694827         | 7.94          | 224820         | 11.23         |
| 14.750         | 19558310        | 42.00         | 855489         | 42.74         |
| 15.858         | 19628064        | 42.15         | 778337         | 38.89         |
| 16.800         | 3681084         | 7.91          | 142590         | 7.12          |
| <b>Totals</b>  | <b>46562804</b> | <b>100.00</b> | <b>2001525</b> | <b>100.00</b> |

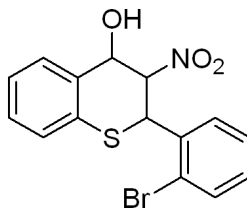

**10b, racemic**

## Area % Report

**Method Name:** C:\EZStart\Projects\Default\Methods\AS.met  
**Data:** C:\EZStart\Projects\Default\Data\IX-DR-05-D  
**User:** System  
**Acquired:** 5/17/2007 3:06:11 PM  
**Printed:** 5/17/2007 3:43:28 PM

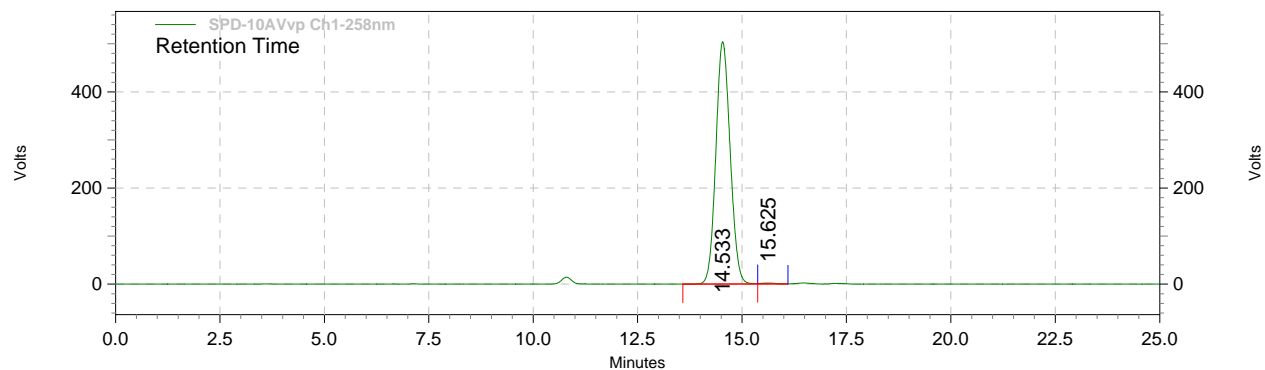

**SPD-10AVvp**  
**Ch1-258nm**  
**Results**

| Retention Time | Area            | Area %        | Height        | Height %      |
|----------------|-----------------|---------------|---------------|---------------|
| 14.533         | 11999158        | 99.63         | 503967        | 99.62         |
| 15.625         | 44167           | 0.37          | 1905          | 0.38          |
| <b>Totals</b>  | <b>12043325</b> | <b>100.00</b> | <b>505872</b> | <b>100.00</b> |

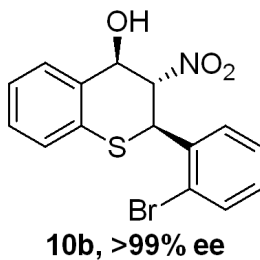

## Area % Report

**Method Name:** C:\EZStart\Projects\Default\Methods\AS.met  
**Data:** C:\EZStart\Projects\Default\Data\VIII-DR-147-RACEMIC  
**User:** System  
**Acquired:** 4/15/2007 11:14:44 AM  
**Printed:** 5/16/2007 2:12:43 PM

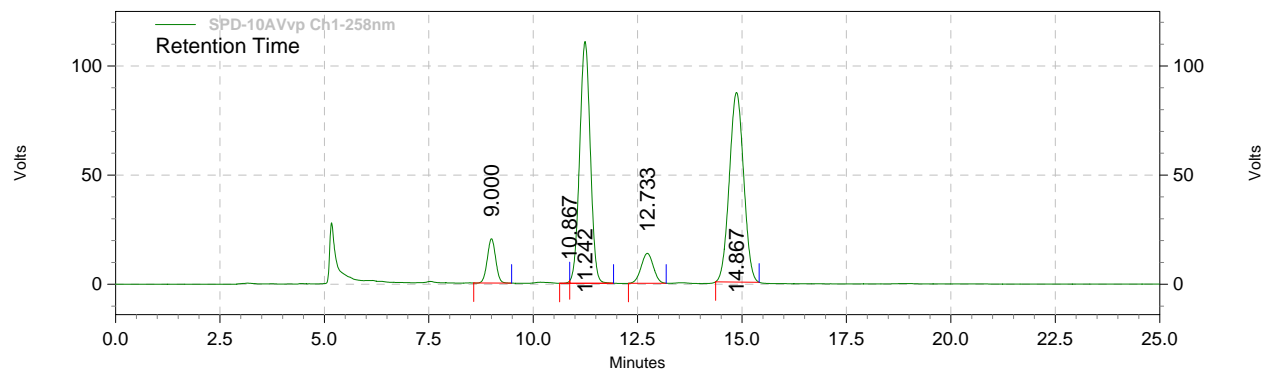

### SPD-10AVvp Ch1-258nm Results

| Retention Time | Area    | Area % | Height | Height % |
|----------------|---------|--------|--------|----------|
| 9.000          | 282849  | 6.16   | 20309  | 8.74     |
| 10.867         | 2990    | 0.07   | 969    | 0.42     |
| 11.242         | 1961037 | 42.73  | 110644 | 47.59    |
| 12.733         | 277677  | 6.05   | 13712  | 5.90     |
| 14.867         | 2064754 | 44.99  | 86842  | 37.36    |
| Totals         | 4589307 | 100.00 | 232476 | 100.00   |

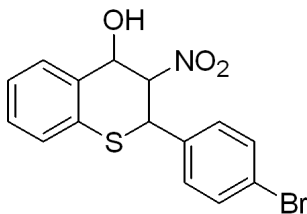

**10c, racemic**

## Area % Report

**Method Name:** C:\EZStart\Projects\Default\Methods\AS.met  
**Data:** C:\EZStart\Projects\Default\Data\VIII-DR-149-C  
**User:** System  
**Acquired:** 4/16/2007 10:33:32 AM  
**Printed:** 5/16/2007 2:13:32 PM

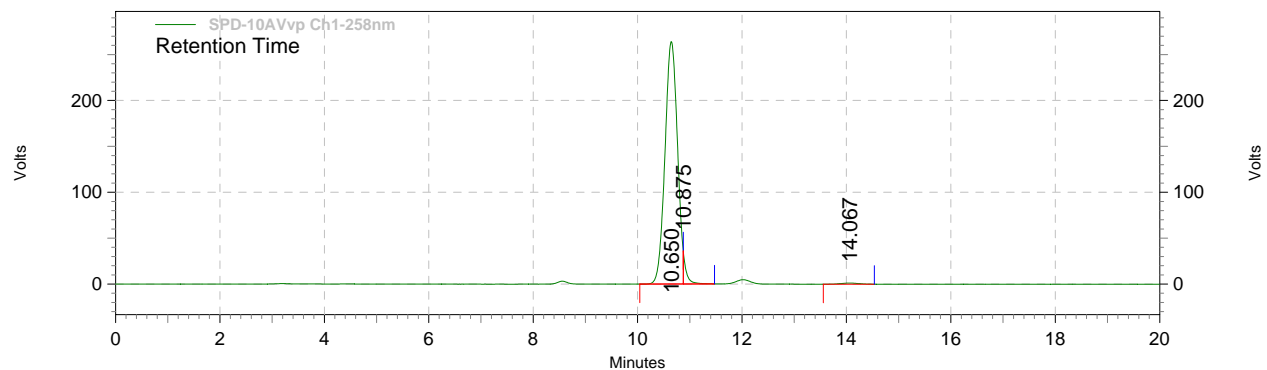

**SPD-10AVvp**  
**Ch1-258nm**  
**Results**

| Retention Time | Area    | Area % | Height | Height % |
|----------------|---------|--------|--------|----------|
| 10.650         | 4350335 | 96.33  | 263932 | 87.61    |
| 10.875         | 136925  | 3.03   | 36076  | 11.98    |
| 14.067         | 28930   | 0.64   | 1243   | 0.41     |
| Totals         | 4516190 | 100.00 | 301251 | 100.00   |

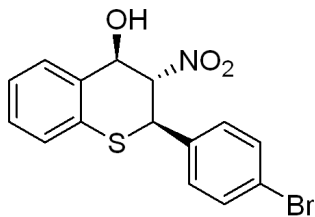

**10c, 99% ee**

## Area % Report

**Method Name:** C:\EZStart\Projects\Default\Methods\AS.met  
**Data:** C:\EZStart\Projects\Default\Data\IX-DR-07-RACEMIC-A  
**User:** System  
**Acquired:** 4/20/2007 10:48:27 AM  
**Printed:** 5/16/2007 2:14:00 PM

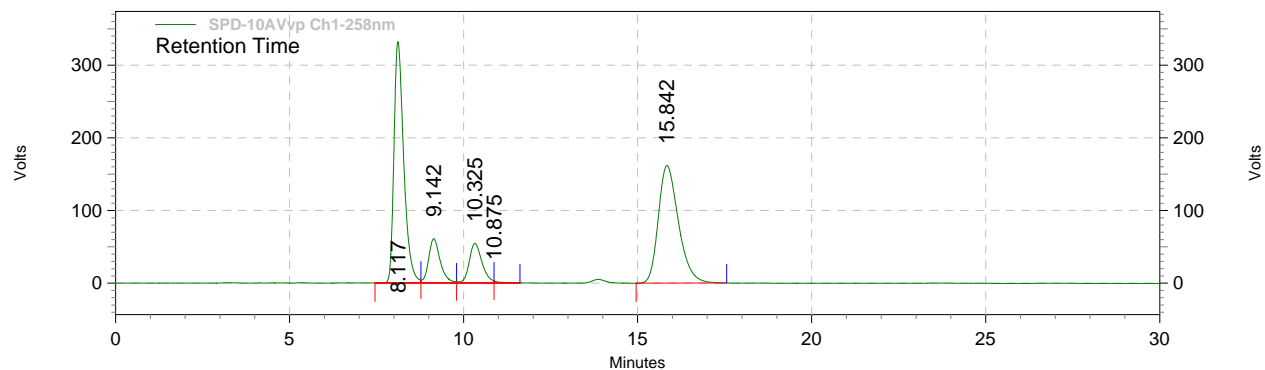

### SPD-10AVvp Ch1-258nm Results

| Retention Time | Area            | Area %        | Height        | Height %      |
|----------------|-----------------|---------------|---------------|---------------|
| 8.117          | 6484786         | 41.00         | 331989        | 54.25         |
| 9.142          | 1411334         | 8.92          | 60919         | 9.95          |
| 10.325         | 1391025         | 8.79          | 54515         | 8.91          |
| 10.875         | 33150           | 0.21          | 2757          | 0.45          |
| 15.842         | 6497740         | 41.08         | 161792        | 26.44         |
| <b>Totals</b>  | <b>15818035</b> | <b>100.00</b> | <b>611972</b> | <b>100.00</b> |

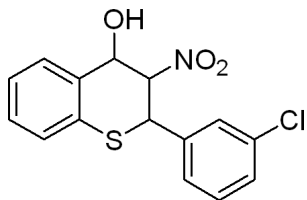

**10d, racemic**

## Area % Report

**Method Name:** C:\EZStart\Projects\Default\Methods\AS.met  
**Data:** C:\EZStart\Projects\Default\Data\IX-DR-08-A  
**User:** System  
**Acquired:** 4/20/2007 5:10:44 PM  
**Printed:** 5/16/2007 2:14:45 PM

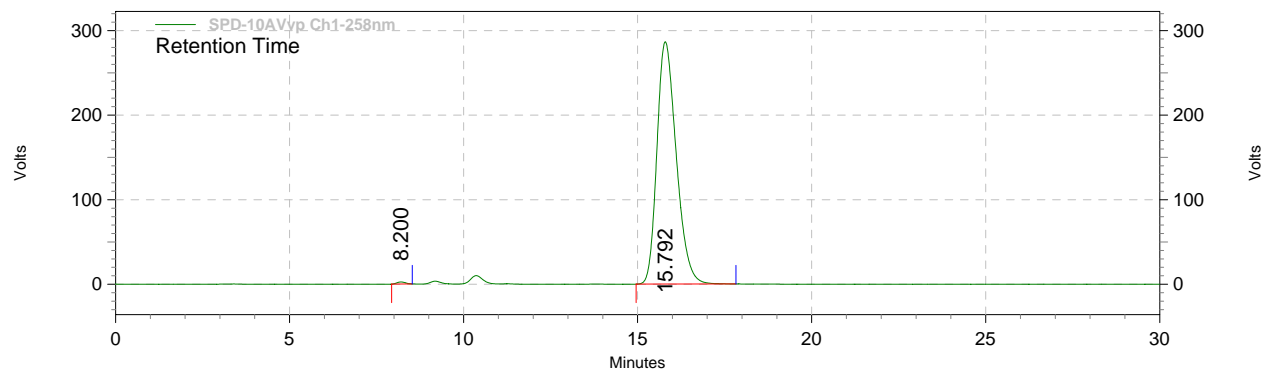

**SPD-10AVvp**  
**Ch1-258nm**  
**Results**

| Retention Time | Area            | Area %        | Height        | Height %      |
|----------------|-----------------|---------------|---------------|---------------|
| 8.200          | 41681           | 0.38          | 2486          | 0.86          |
| 15.792         | 11056539        | 99.62         | 286553        | 99.14         |
| <b>Totals</b>  | <b>11098220</b> | <b>100.00</b> | <b>289039</b> | <b>100.00</b> |

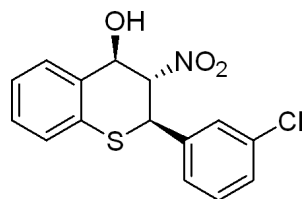

**10d, >99% ee**

## Area % Report

**Method Name:** C:\EZStart\Projects\Default\Methods\AS.met  
**Data:** C:\EZStart\Projects\Default\Data\IX-DR-02-RACEMIC  
**User:** System  
**Acquired:** 4/19/2007 2:23:17 PM  
**Printed:** 5/16/2007 2:15:13 PM

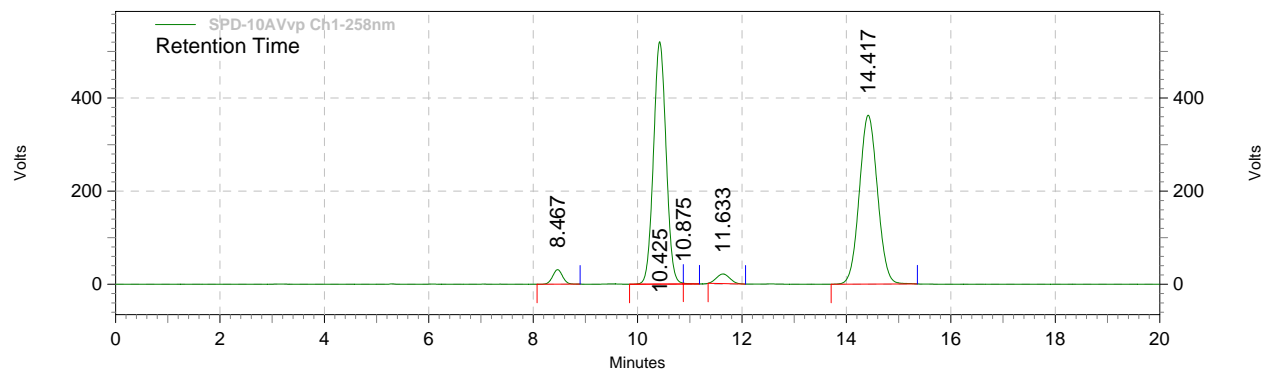

### SPD-10AVvp Ch1-258nm Results

| Retention Time | Area            | Area %        | Height        | Height %      |
|----------------|-----------------|---------------|---------------|---------------|
| 8.467          | 415312          | 2.27          | 31386         | 3.35          |
| 10.425         | 8715388         | 47.72         | 520588        | 55.53         |
| 10.875         | 11186           | 0.06          | 1946          | 0.21          |
| 11.633         | 367489          | 2.01          | 20688         | 2.21          |
| 14.417         | 8755795         | 47.94         | 362861        | 38.71         |
| <b>Totals</b>  | <b>18265170</b> | <b>100.00</b> | <b>937469</b> | <b>100.00</b> |

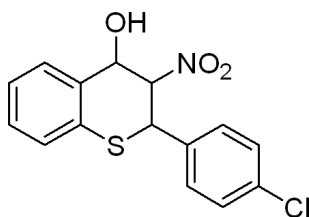

**10e, racemic**

## Area % Report

**Method Name:** C:\EZStart\Projects\Default\Methods\AS.met  
**Data:** C:\EZStart\Projects\Default\Data\IX-DR-06-A  
**User:** System  
**Acquired:** 4/19/2007 4:03:36 PM  
**Printed:** 5/16/2007 2:15:52 PM

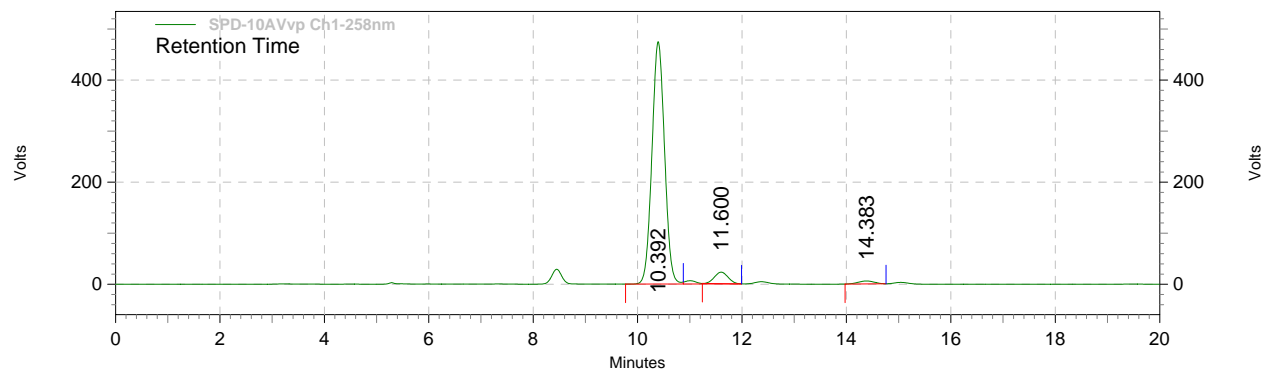

### SPD-10AVvp Ch1-258nm Results

| Retention Time | Area    | Area % | Height | Height % |
|----------------|---------|--------|--------|----------|
| 10.392         | 7960637 | 93.74  | 474629 | 94.38    |
| 11.600         | 409113  | 4.82   | 22559  | 4.49     |
| 14.383         | 122348  | 1.44   | 5702   | 1.13     |
| Totals         | 8492098 | 100.00 | 502890 | 100.00   |

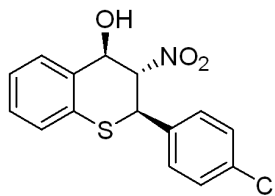

**10e, 97% ee**



## Area % Report

**Method Name:** C:\EZStart\Projects\Default\Methods\AS.met  
**Data:** C:\EZStart\Projects\Default\Data\VIII-DR-152-A  
**User:** System  
**Acquired:** 4/18/2007 12:54:13 PM  
**Printed:** 5/16/2007 2:17:22 PM

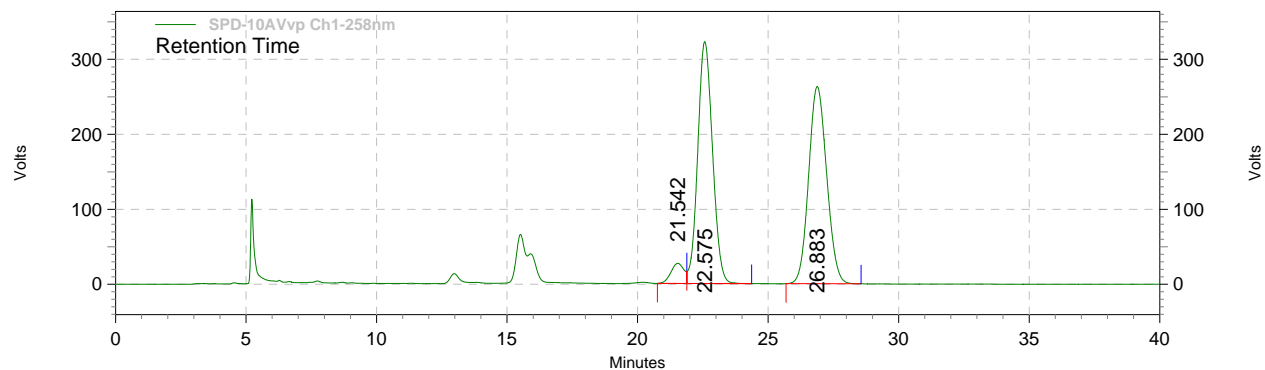

### SPD-10AVvp Ch1-258nm Results

| Retention Time | Area     | Area % | Height | Height % |
|----------------|----------|--------|--------|----------|
| 21.542         | 923393   | 3.51   | 26716  | 4.36     |
| 22.575         | 12719040 | 48.36  | 322422 | 52.67    |
| 26.883         | 12658999 | 48.13  | 263044 | 42.97    |
| Totals         | 26301432 | 100.00 | 612182 | 100.00   |

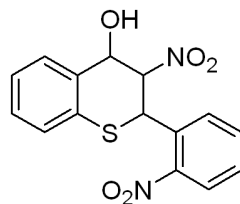

10f, racemic

## Area % Report

**Method Name:** C:\EZStart\Projects\Default\Methods\AS.met  
**Data:** C:\EZStart\Projects\Default\Data\IX-DR-01-B  
**User:** System  
**Acquired:** 4/18/2007 2:24:02 PM  
**Printed:** 5/16/2007 2:18:39 PM

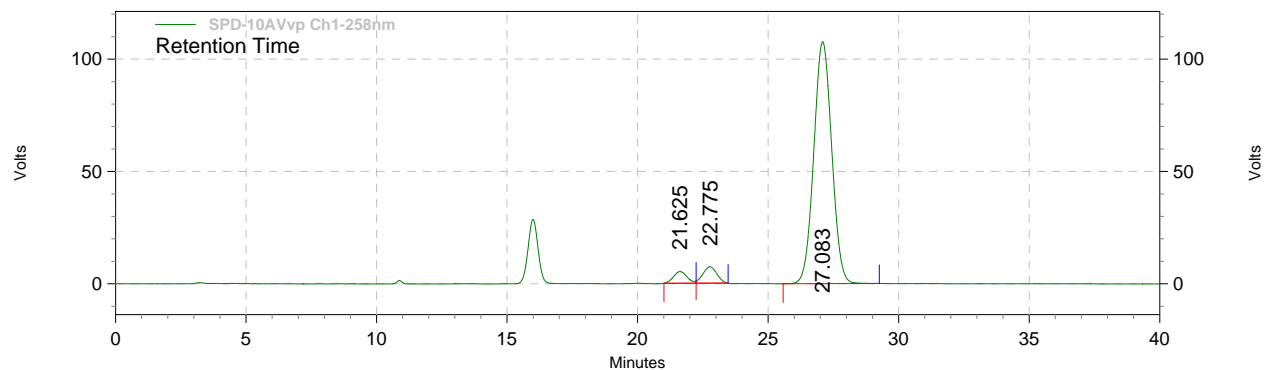

**SPD-10AVvp**  
**Ch1-258nm**  
**Results**

| Retention Time | Area           | Area %        | Height        | Height %      |
|----------------|----------------|---------------|---------------|---------------|
| 21.625         | 186581         | 3.33          | 5199          | 4.33          |
| 22.775         | 269471         | 4.81          | 7293          | 6.07          |
| 27.083         | 5149258        | 91.86         | 107660        | 89.60         |
| <b>Totals</b>  | <b>5605310</b> | <b>100.00</b> | <b>120152</b> | <b>100.00</b> |

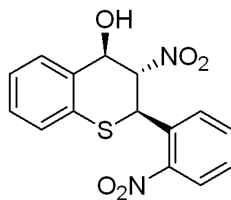

**10f, 90% ee**

## Area % Report

**Method Name:** C:\EZStart\Projects\Default\Methods\AS.met  
**Data:** C:\EZStart\Projects\Default\Data\VIII-DR-138-4  
**User:** System  
**Acquired:** 4/13/2007 6:27:31 PM  
**Printed:** 5/16/2007 2:09:38 PM

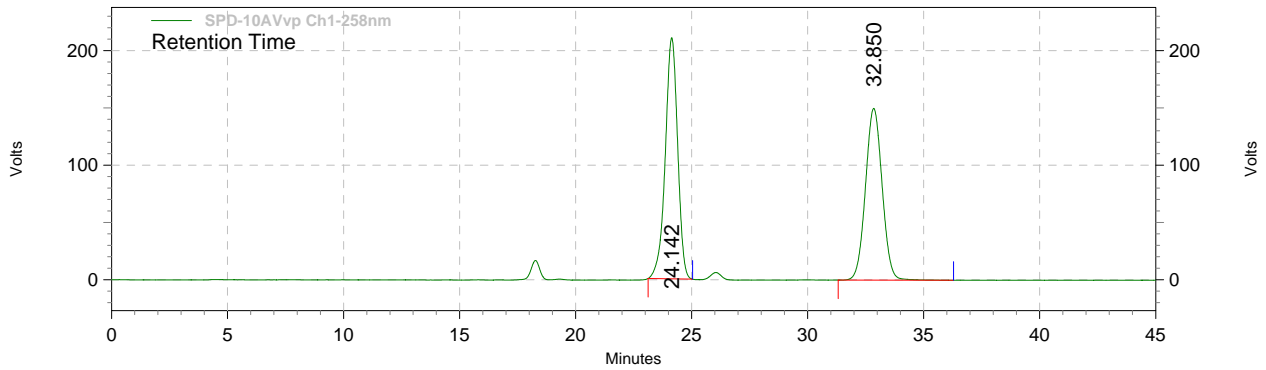

**SPD-10AVvp**  
**Ch1-258nm**  
**Results**

| Retention Time | Area     | Area % | Height | Height % |
|----------------|----------|--------|--------|----------|
| 24.142         | 7799441  | 51.04  | 210515 | 58.39    |
| 32.850         | 7480239  | 48.96  | 149992 | 41.61    |
| Totals         | 15279680 | 100.00 | 360507 | 100.00   |

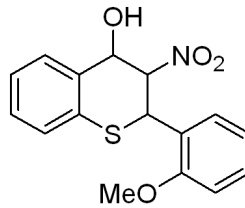

**10g, racemic**

## Area % Report

**Method Name:** C:\EZStart\Projects\Default\Methods\AS.met  
**Data:** C:\EZStart\Projects\Default\Data\IX-DR-38  
**User:** System  
**Acquired:** 5/16/2007 1:20:59 PM  
**Printed:** 5/16/2007 2:06:20 PM

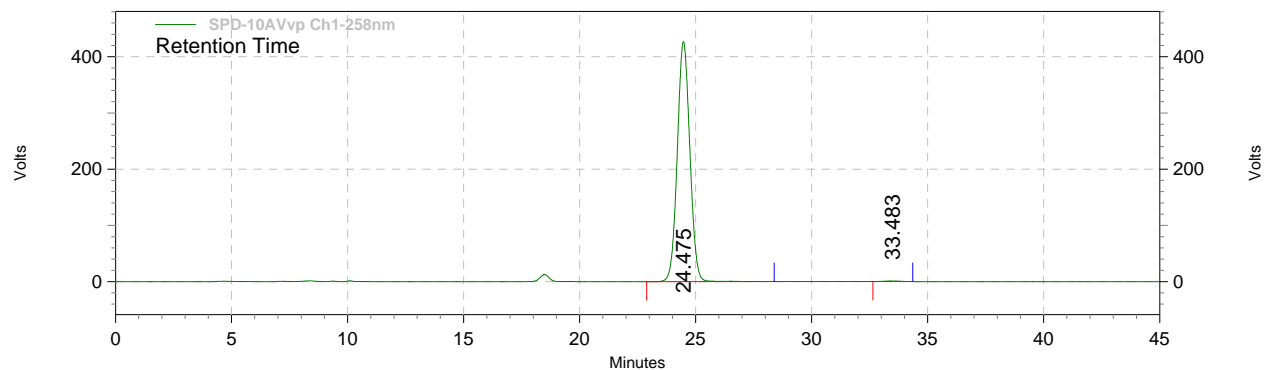

### SPD-10AVvp Ch1-258nm Results

| Retention Time | Area            | Area %        | Height        | Height %      |
|----------------|-----------------|---------------|---------------|---------------|
| 24.475         | 16052203        | 99.70         | 426720        | 99.76         |
| 33.483         | 48585           | 0.30          | 1009          | 0.24          |
| <b>Totals</b>  | <b>16100788</b> | <b>100.00</b> | <b>427729</b> | <b>100.00</b> |

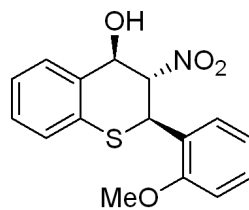

**10g, >99% ee**

## Area % Report

**Method Name:** C:\EZStart\Projects\Default\Methods\AS.met  
**Data:** C:\EZStart\Projects\Default\Data\VIII-DR-142-RACEMIC-1  
**User:** System  
**Acquired:** 4/14/2007 11:47:43 AM  
**Printed:** 5/16/2007 2:19:26 PM

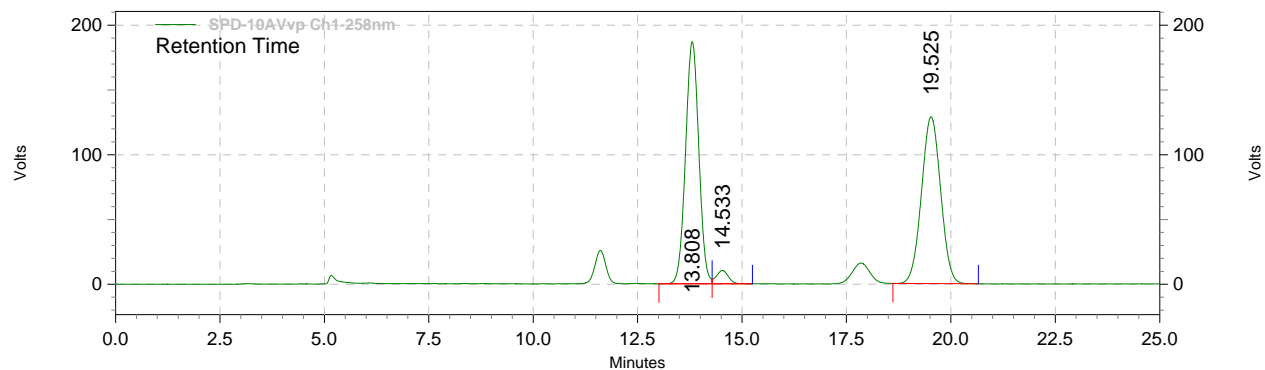

**SPD-10AVvp**  
**Ch1-258nm**  
**Results**

| Retention Time | Area    | Area % | Height | Height % |
|----------------|---------|--------|--------|----------|
| 13.808         | 4131189 | 48.90  | 186874 | 57.31    |
| 14.533         | 205243  | 2.43   | 10319  | 3.16     |
| 19.525         | 4112555 | 48.68  | 128862 | 39.52    |
| Totals         | 8448987 | 100.00 | 326055 | 100.00   |

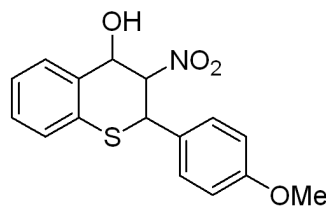

**10h, racemic**

## Area % Report

**Method Name:** C:\EZStart\Projects\Default\Methods\AS.met  
**Data:** C:\EZStart\Projects\Default\Data\VIII-DR-145-4  
**User:** System  
**Acquired:** 4/14/2007 10:44:28 PM  
**Printed:** 5/16/2007 2:20:06 PM

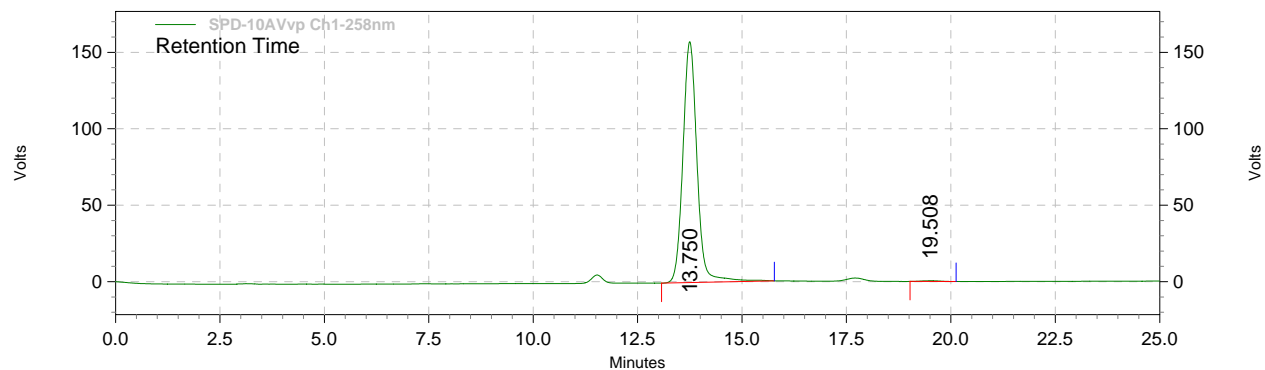

### SPD-10AVvp Ch1-258nm Results

| Retention Time | Area    | Area % | Height | Height % |
|----------------|---------|--------|--------|----------|
| 13.750         | 3694473 | 99.62  | 157457 | 99.70    |
| 19.508         | 13923   | 0.38   | 472    | 0.30     |
| Totals         | 3708396 | 100.00 | 157929 | 100.00   |

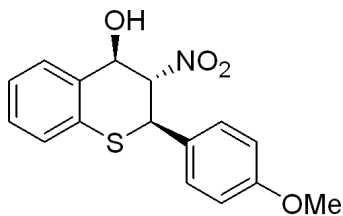

**10h, >99% ee**

## Area % Report

**Method Name:** C:\EZStart\Projects\Default\Methods\AS.met  
**Data:** C:\EZStart\Projects\Default\Data\VIII-DR-151-RACEMIC  
**User:** System  
**Acquired:** 4/16/2007 1:09:38 PM  
**Printed:** 5/16/2007 2:20:50 PM

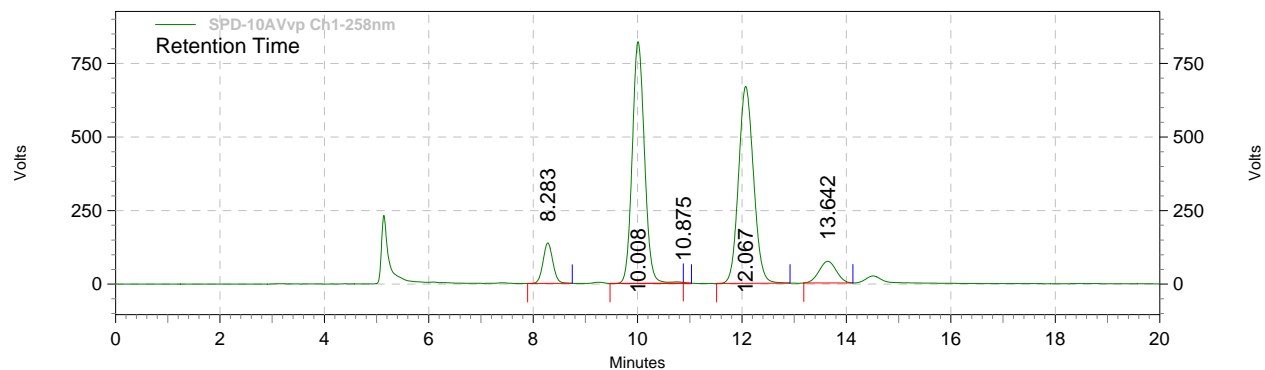

### SPD-10AVvp Ch1-258nm Results

| Retention Time | Area            | Area %        | Height         | Height %      |
|----------------|-----------------|---------------|----------------|---------------|
| 8.283          | 1783570         | 5.90          | 137363         | 8.06          |
| 10.008         | 13400938        | 44.32         | 821210         | 48.19         |
| 10.875         | 11825           | 0.04          | 2956           | 0.17          |
| 12.067         | 13350748        | 44.16         | 668984         | 39.25         |
| 13.642         | 1687753         | 5.58          | 73694          | 4.32          |
| <b>Totals</b>  | <b>30234834</b> | <b>100.00</b> | <b>1704207</b> | <b>100.00</b> |

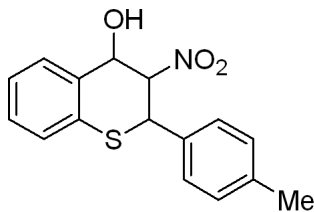

**10i, racemic**

## Area % Report

**Method Name:** C:\EZStart\Projects\Default\Methods\AS.met  
**Data:** C:\EZStart\Projects\Default\Data\IX-DR-03-A  
**User:** System  
**Acquired:** 4/19/2007 10:49:00 AM  
**Printed:** 5/16/2007 2:21:21 PM

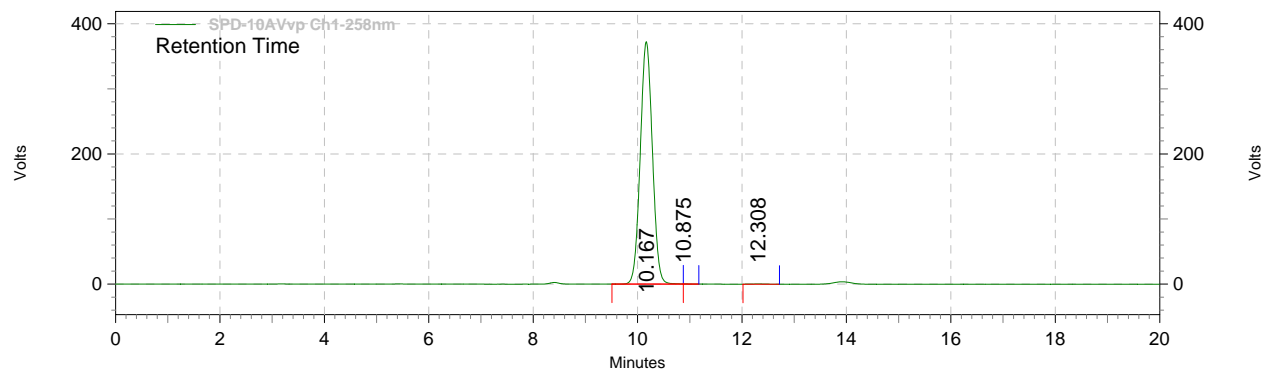

**SPD-10AVvp**  
**Ch1-258nm**  
**Results**

| Retention Time | Area    | Area % | Height | Height % |
|----------------|---------|--------|--------|----------|
| 10.167         | 6001800 | 99.87  | 372330 | 99.84    |
| 10.875         | 1842    | 0.03   | 257    | 0.07     |
| 12.308         | 6022    | 0.10   | 332    | 0.09     |
| Totals         | 6009664 | 100.00 | 372919 | 100.00   |

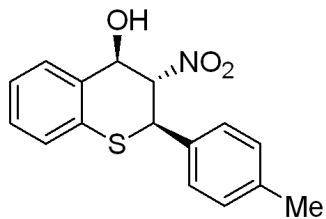

**10i, >99% ee**



## Area % Report

**Method Name:** C:\EZStart\Projects\Default\Methods\AS.met  
**Data:** C:\EZStart\Projects\Default\Data\IX-DR-12-A  
**User:** System  
**Acquired:** 4/25/2007 4:52:03 PM  
**Printed:** 5/16/2007 2:23:50 PM

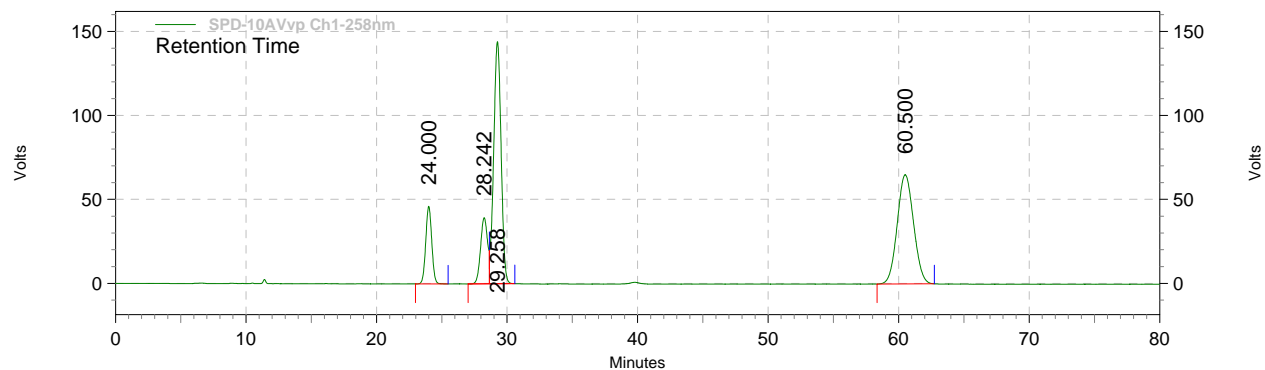

### SPD-10AVvp Ch1-258nm Results

| Retention Time | Area            | Area %        | Height        | Height %      |
|----------------|-----------------|---------------|---------------|---------------|
| 24.000         | 1480220         | 10.36         | 46247         | 15.69         |
| 28.242         | 1458891         | 10.21         | 39439         | 13.38         |
| 29.258         | 5701129         | 39.89         | 144117        | 48.89         |
| 60.500         | 5652327         | 39.55         | 64981         | 22.04         |
| <b>Totals</b>  | <b>14292567</b> | <b>100.00</b> | <b>294784</b> | <b>100.00</b> |

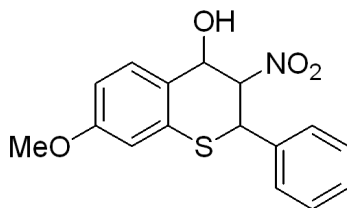

**10j, racemic**

## Area % Report

**Method Name:** C:\EZStart\Projects\Default\Methods\AS.met  
**Data:** C:\EZStart\Projects\Default\Data\IX-DR-15-A  
**User:** System  
**Acquired:** 4/27/2007 1:24:36 PM  
**Printed:** 5/16/2007 2:24:35 PM

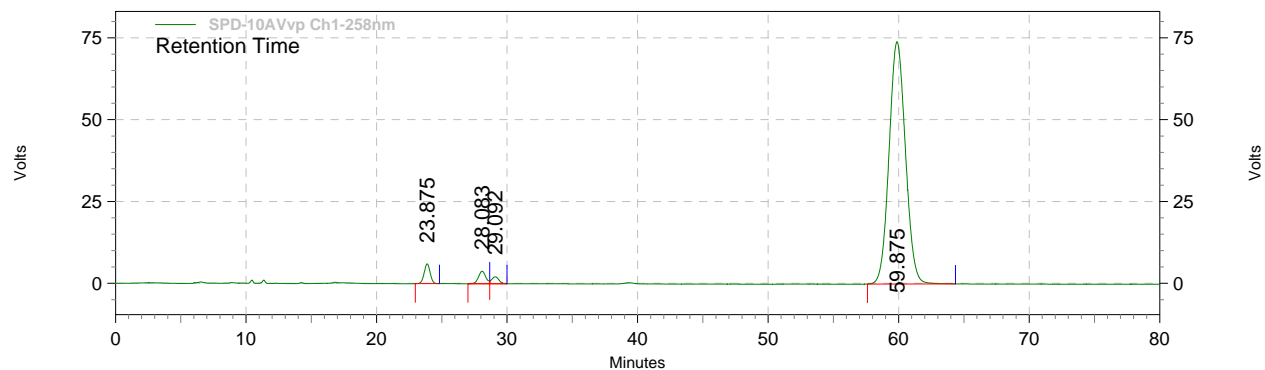

### SPD-10AVvp Ch1-258nm Results

| Retention Time | Area           | Area %        | Height       | Height %      |
|----------------|----------------|---------------|--------------|---------------|
| 23.875         | 193782         | 2.82          | 6042         | 7.03          |
| 28.083         | 147961         | 2.15          | 3815         | 4.44          |
| 29.092         | 79914          | 1.16          | 2122         | 2.47          |
| 59.875         | 6457377        | 93.87         | 74025        | 86.07         |
| <b>Totals</b>  | <b>6879034</b> | <b>100.00</b> | <b>86004</b> | <b>100.00</b> |

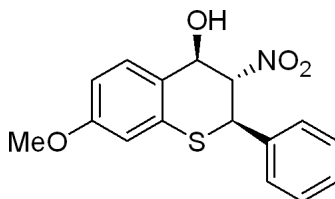

**10j, 98% ee**

## Area % Report

**Method Name:** C:\EZStart\Projects\Default\Methods\AS.met  
**Data:** C:\EZStart\Projects\Default\Data\IX-DR-13-RACEMIC  
**User:** System  
**Acquired:** 4/26/2007 10:42:50 AM  
**Printed:** 5/16/2007 2:25:09 PM

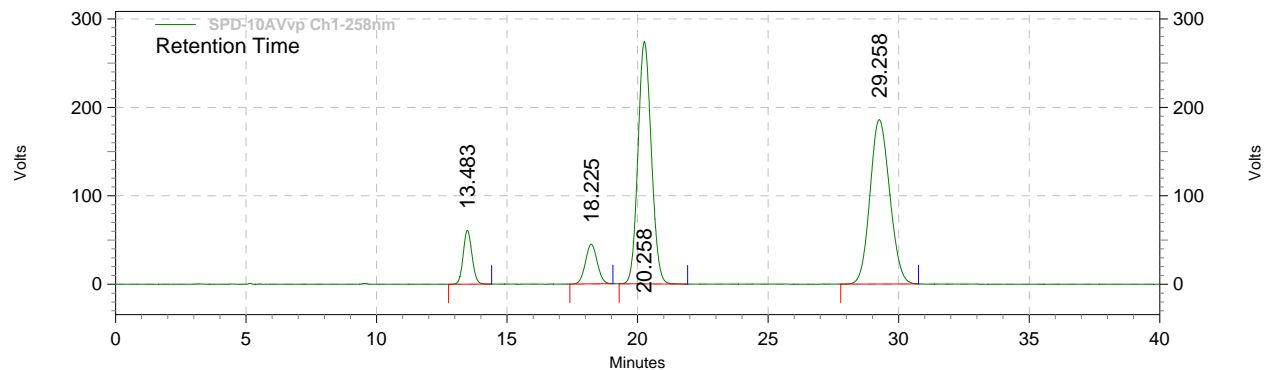

### SPD-10AVvp Ch1-258nm Results

| Retention Time | Area            | Area %        | Height        | Height %      |
|----------------|-----------------|---------------|---------------|---------------|
| 13.483         | 1422640         | 6.37          | 60877         | 10.77         |
| 18.225         | 1407883         | 6.30          | 44872         | 7.94          |
| 20.258         | 9745782         | 43.64         | 273762        | 48.42         |
| 29.258         | 9753374         | 43.68         | 185853        | 32.87         |
| <b>Totals</b>  | <b>22329679</b> | <b>100.00</b> | <b>565364</b> | <b>100.00</b> |

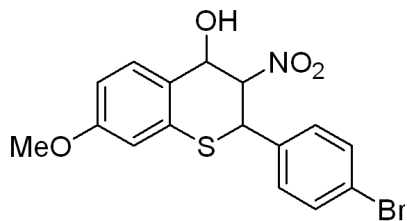

**10k, racemic**

## Area % Report

**Method Name:** C:\EZStart\Projects\Default\Methods\AS.met  
**Data:** C:\EZStart\Projects\Default\Data\IX-DR-14-PURE-A  
**User:** System  
**Acquired:** 4/26/2007 2:08:51 PM  
**Printed:** 5/16/2007 2:25:33 PM

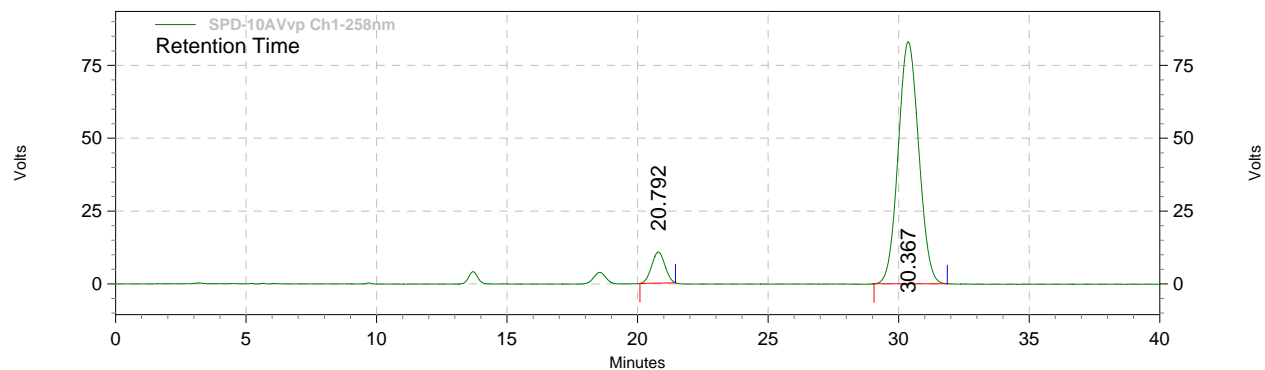

### SPD-10AVvp Ch1-258nm Results

| Retention Time | Area    | Area % | Height | Height % |
|----------------|---------|--------|--------|----------|
| 20.792         | 377246  | 7.66   | 10674  | 11.38    |
| 30.367         | 4549549 | 92.34  | 83094  | 88.62    |
| Totals         | 4926795 | 100.00 | 93768  | 100.00   |

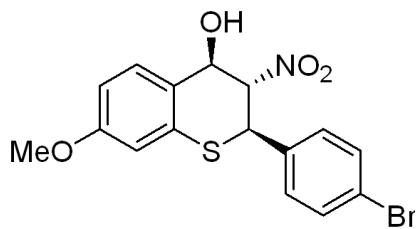

**10k, 85% ee**

## Area % Report

**Method Name:** C:\EZStart\Projects\Default\Methods\AS.met  
**Data:** C:\EZStart\Projects\Default\Data\IX-DR-19-RACEMIC-C  
**User:** System  
**Acquired:** 5/1/2007 3:49:19 PM  
**Printed:** 5/14/2007 5:17:52 PM

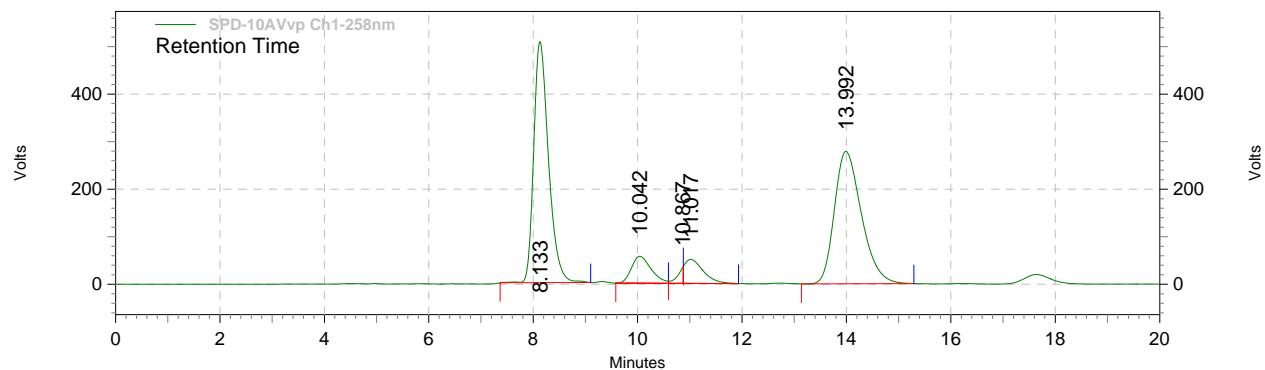

### SPD-10AVvp Ch1-258nm Results

| Retention Time | Area     | Area % | Height | Height % |
|----------------|----------|--------|--------|----------|
| 8.133          | 9996151  | 43.51  | 506832 | 54.70    |
| 10.042         | 1483825  | 6.46   | 56698  | 6.12     |
| 10.867         | 249143   | 1.08   | 34028  | 3.67     |
| 11.017         | 1237678  | 5.39   | 50479  | 5.45     |
| 13.992         | 10007617 | 43.56  | 278594 | 30.07    |
| Totals         | 22974414 | 100.00 | 926631 | 100.00   |

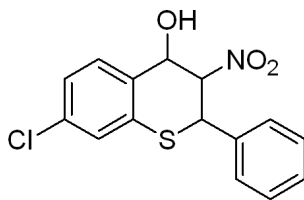

**10I, racemic**

## Area % Report

**Method Name:** C:\EZStart\Projects\Default\Methods\AS.met  
**Data:** C:\EZStart\Projects\Default\Data\IX-DR-20-A  
**User:** System  
**Acquired:** 5/1/2007 4:48:12 PM  
**Printed:** 5/16/2007 2:27:14 PM

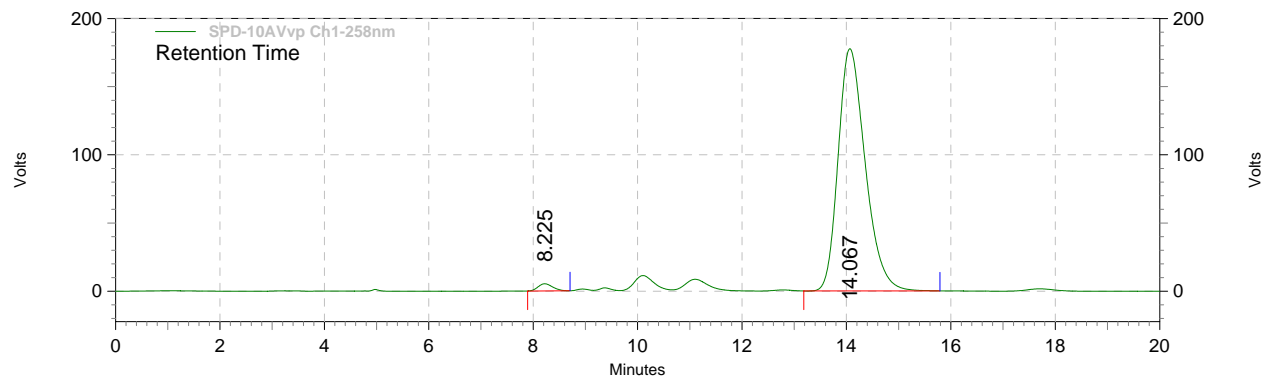

**SPD-10AVvp**  
**Ch1-258nm**  
**Results**

| Retention Time | Area           | Area %        | Height        | Height %      |
|----------------|----------------|---------------|---------------|---------------|
| 8.225          | 102818         | 1.58          | 5295          | 2.89          |
| 14.067         | 6410581        | 98.42         | 177649        | 97.11         |
| <b>Totals</b>  | <b>6513399</b> | <b>100.00</b> | <b>182944</b> | <b>100.00</b> |

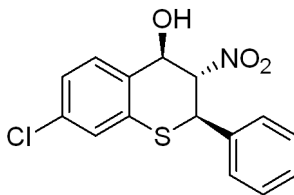

**10**, 97% ee
